# Supplementary material for: Activation of enamine by photoexcited organocatalyst assisted singlet oxygen: synthesis of oxazoles and quinoxalines
Source: Royal Society of Chemistry journal article supplement (doi:10.1039/d4ob00609g), 2024-01-01

## Activation of Enamine by Photoexcited Organo Catalyst Assisted Singlet Oxygen: Synthesis of Oxazoles and Quinoxalines

Selvaraj Elavarasan,<sup>a</sup> Jeyaraj Preeti,<sup>a</sup> M. Kesavan,<sup>b</sup> Ravi B Patel<sup>c</sup> Baburaj Baskar<sup>a</sup>

<sup>a</sup>Laboratory of Sustainable Synthesis, Department of Chemistry, SRM Institute of Science and Technology, Kattankulatur, 603 203, Chengalpet (Dt), Tamilnadu, India. Tel: +919444741149; E-mail: baskarb@srmist.edu.in

<sup>b</sup>Interdisciplinary Institute of Indian System of Medicine (IIISM), SRM Institute of Science and Technology, Kattankulatur, 603 203, Chengalpet (Dt), Tamilnadu, India.

<sup>c</sup>Graduate School of Pharmacy, Gujarat Technological University, Gandhinagar Campus, Gandhinagar – 382028, Gujarat

### Table of contents

|                                                                                   |      |
|-----------------------------------------------------------------------------------|------|
| 1. Photocatalytic set up and structures of organocatalysts .....                  | 2    |
| 2. LC-MS analysis of TEMPO formation .....                                        | 3    |
| 3. Mass spectrum of intermediate 6ac .....                                        | 4    |
| 4. <sup>1</sup> H and <sup>13</sup> C NMR spectra of catalysts and products ..... | 5-36 |

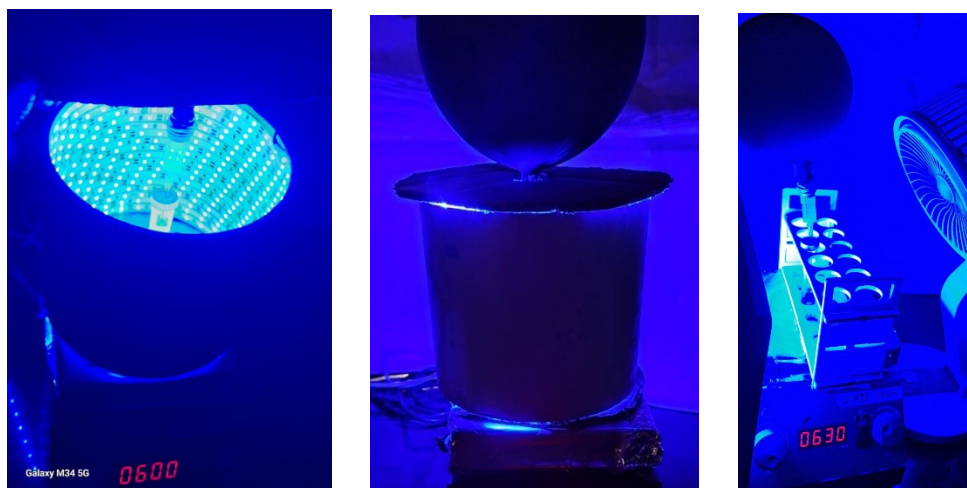

Figure S1. The photocatalytic setup: (a) and (b) reaction under light bath; (c) reaction with colling fan.

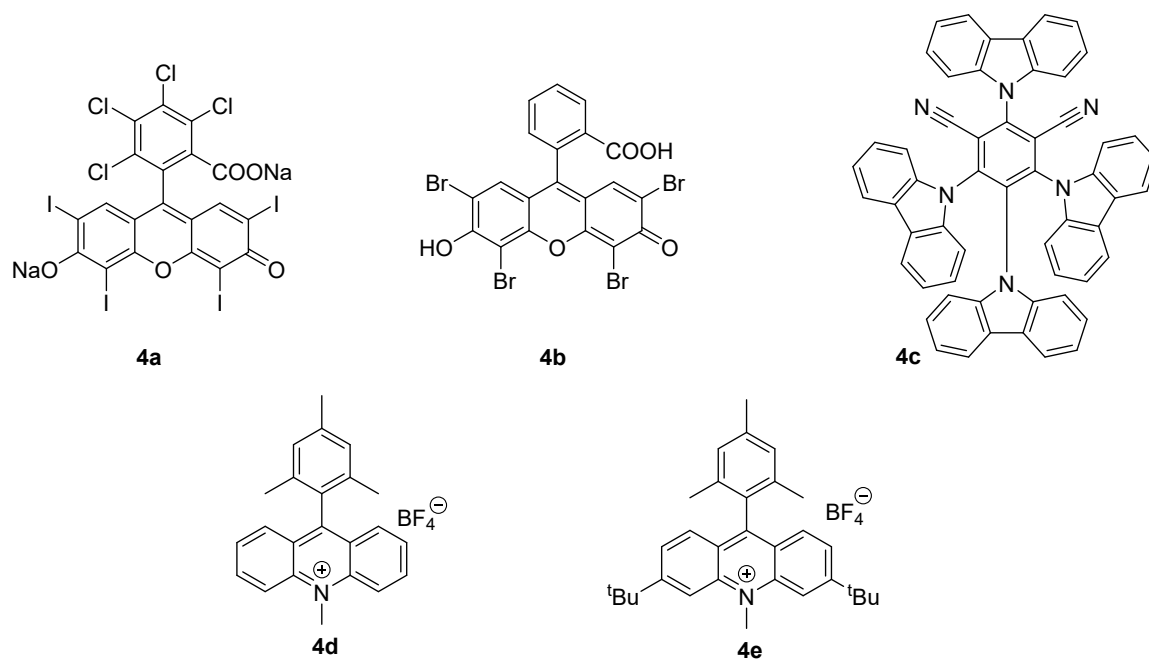

Figure S2. Chemical structure of photocatalysts used in the optimization (4a-4e):

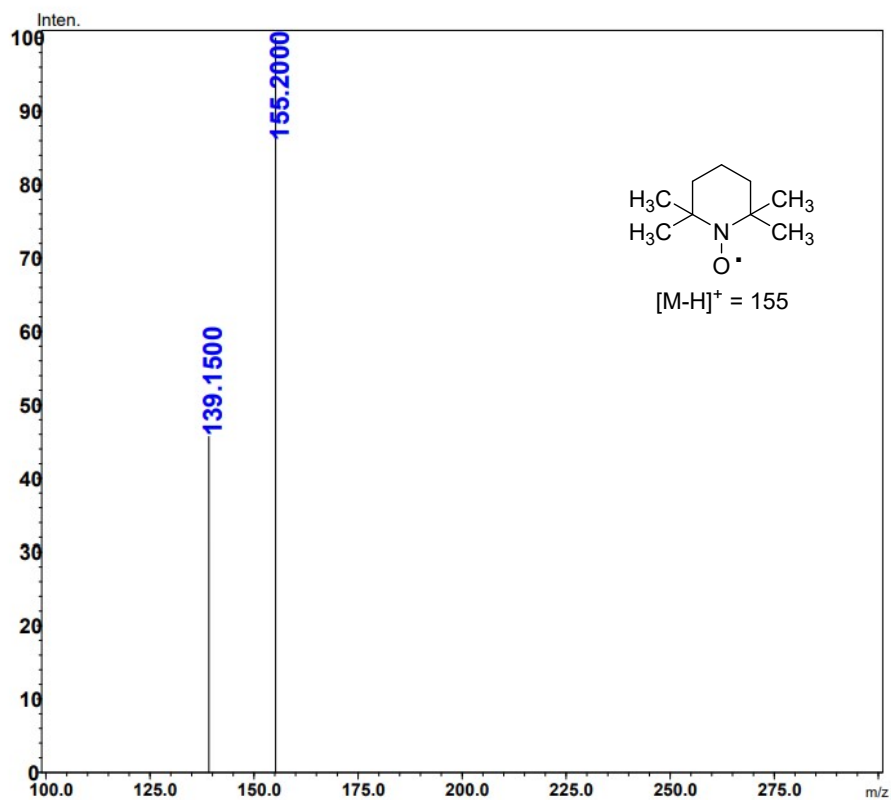

Figure S3 LCMS analysis of TEMPO formation from TEMP.

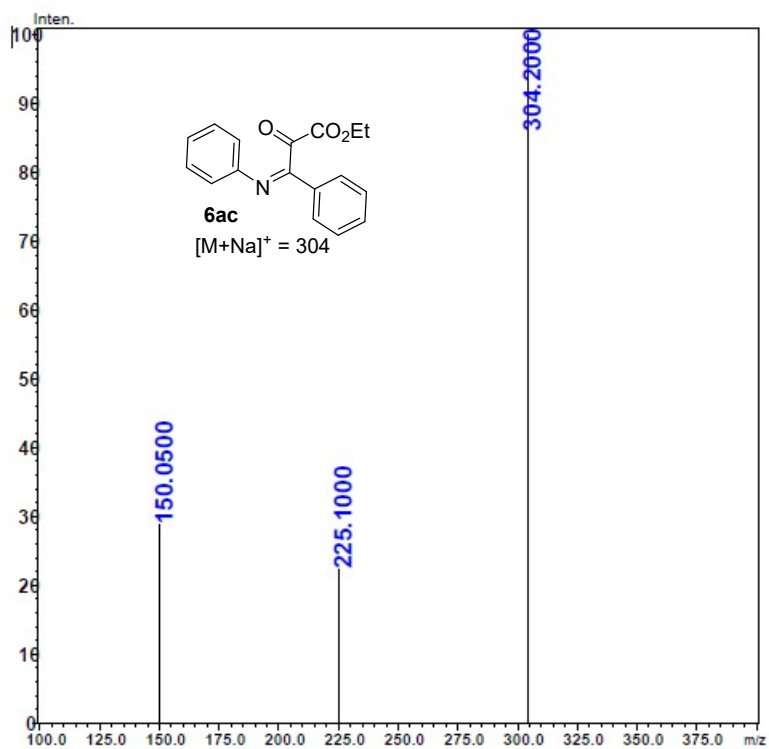

Figure S4. Mass spectrum of intermediate, **6ac**

# <sup>1</sup>H NMR and <sup>13</sup>C NMR Spectra:

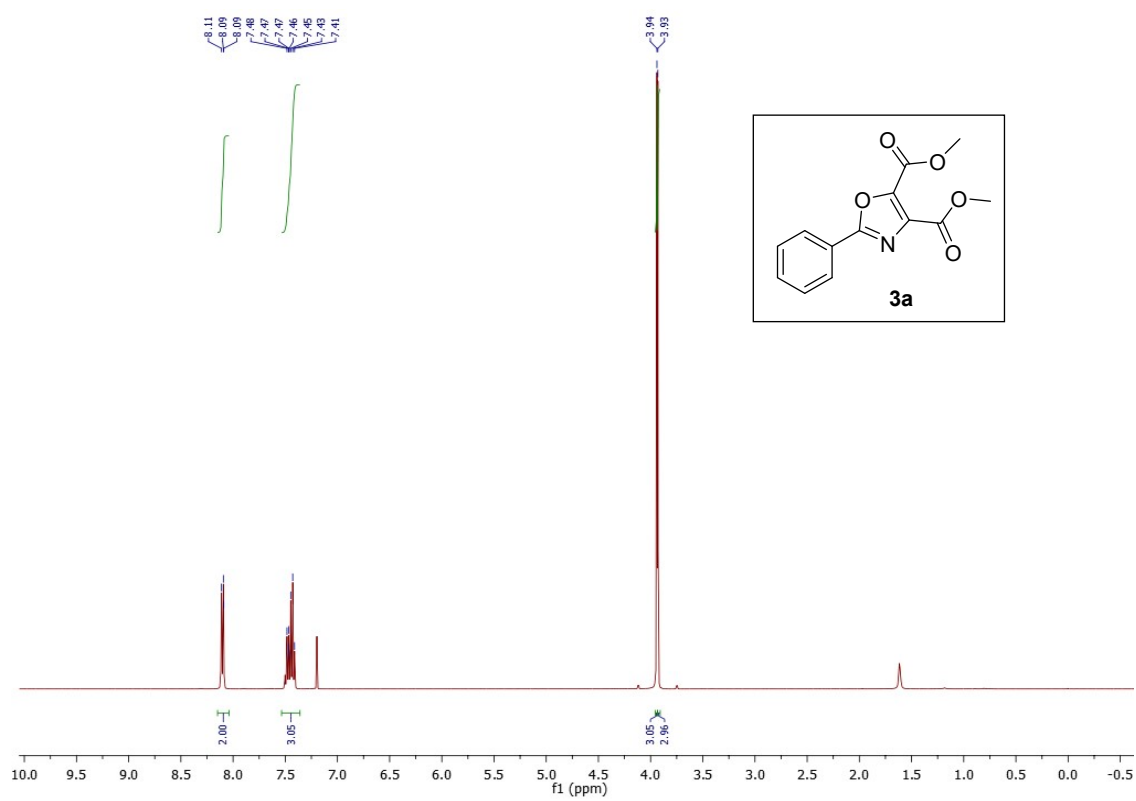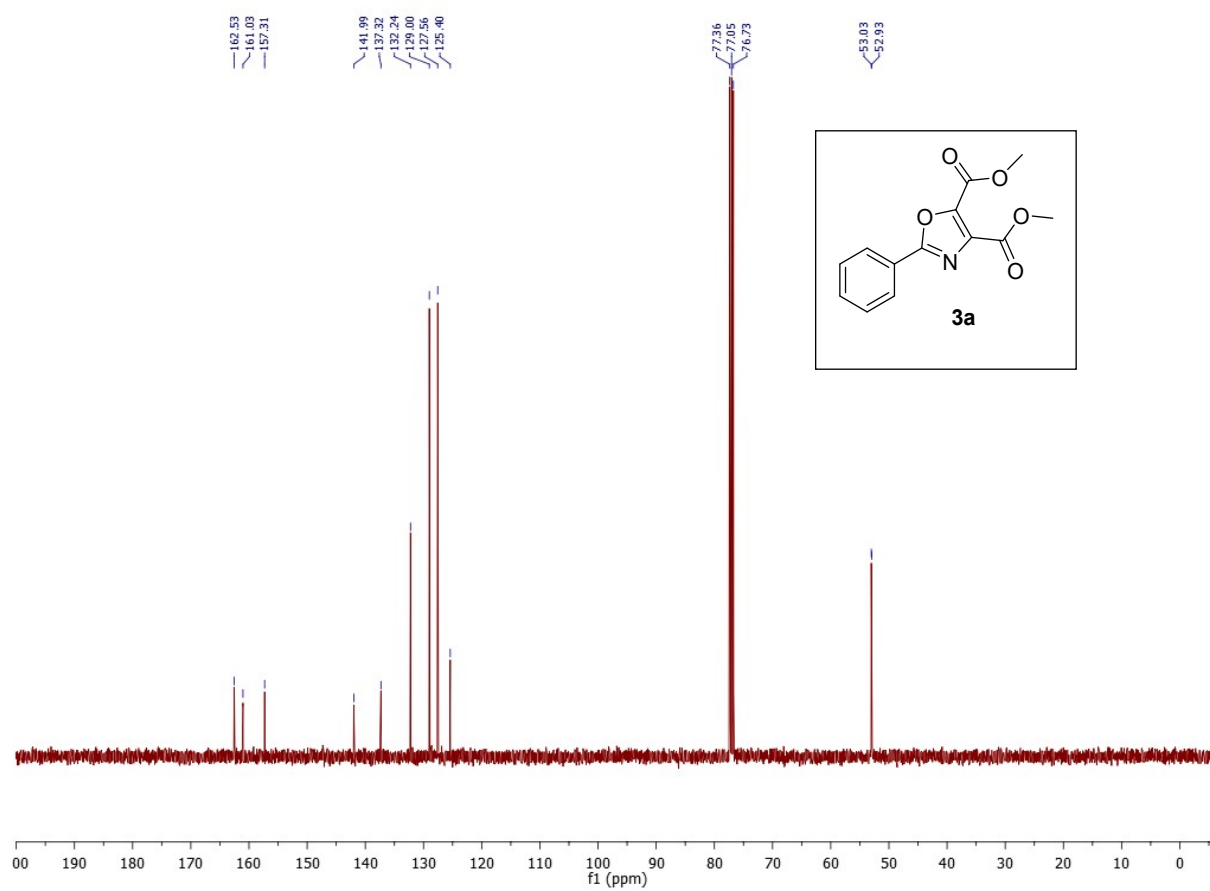

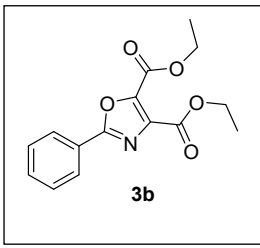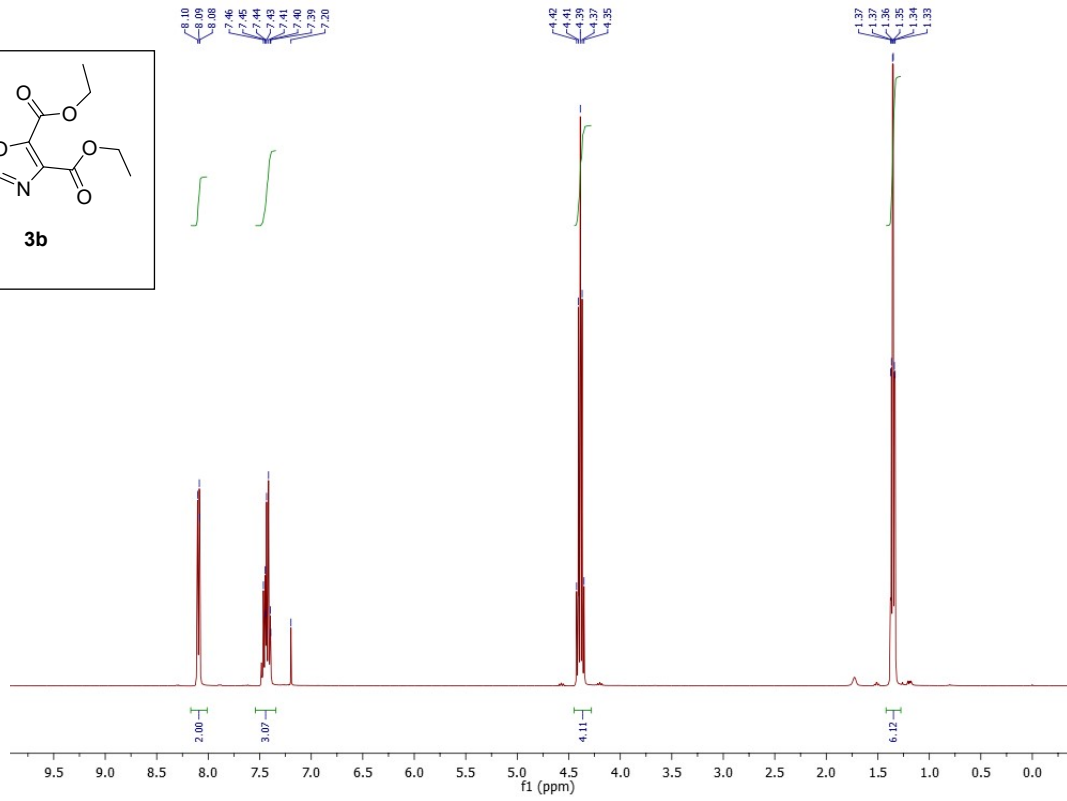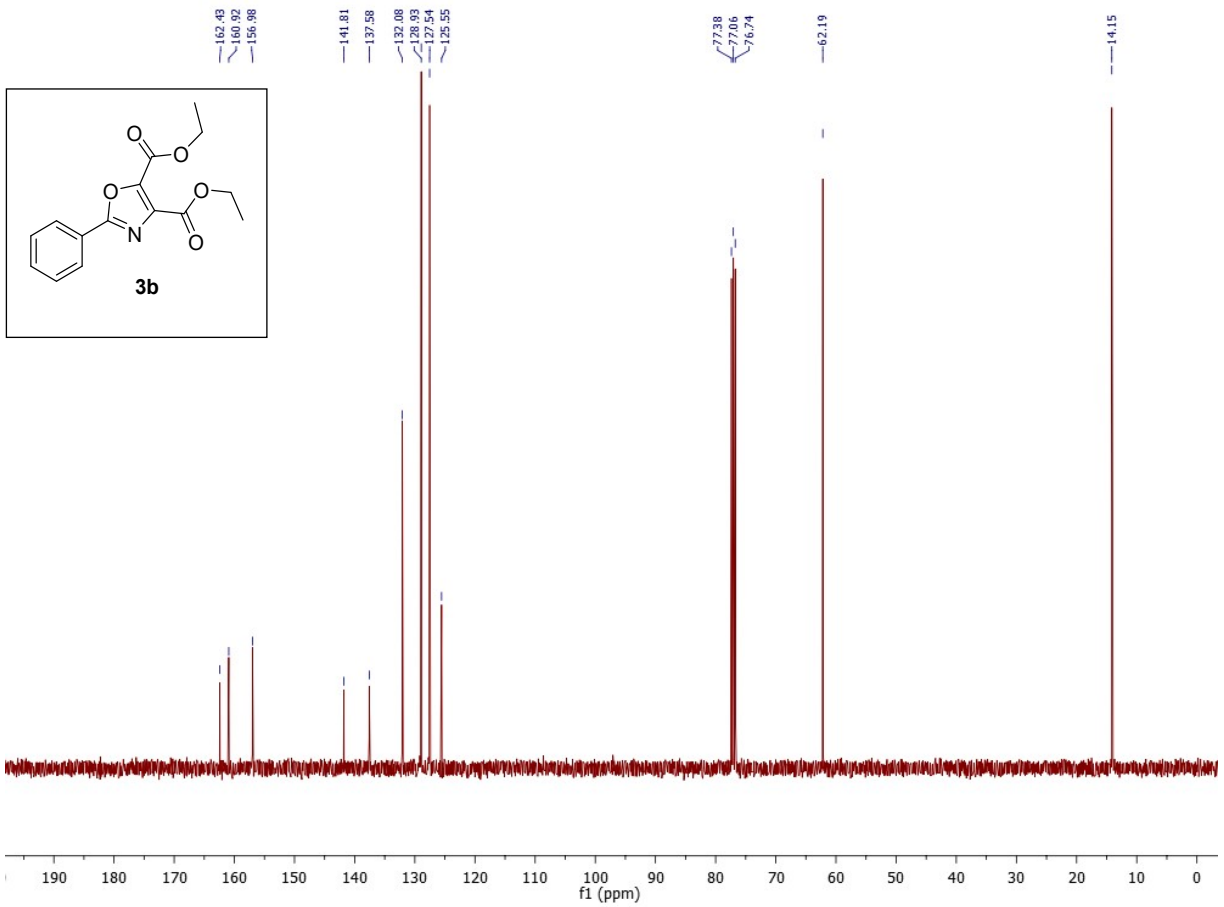

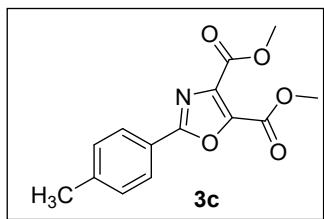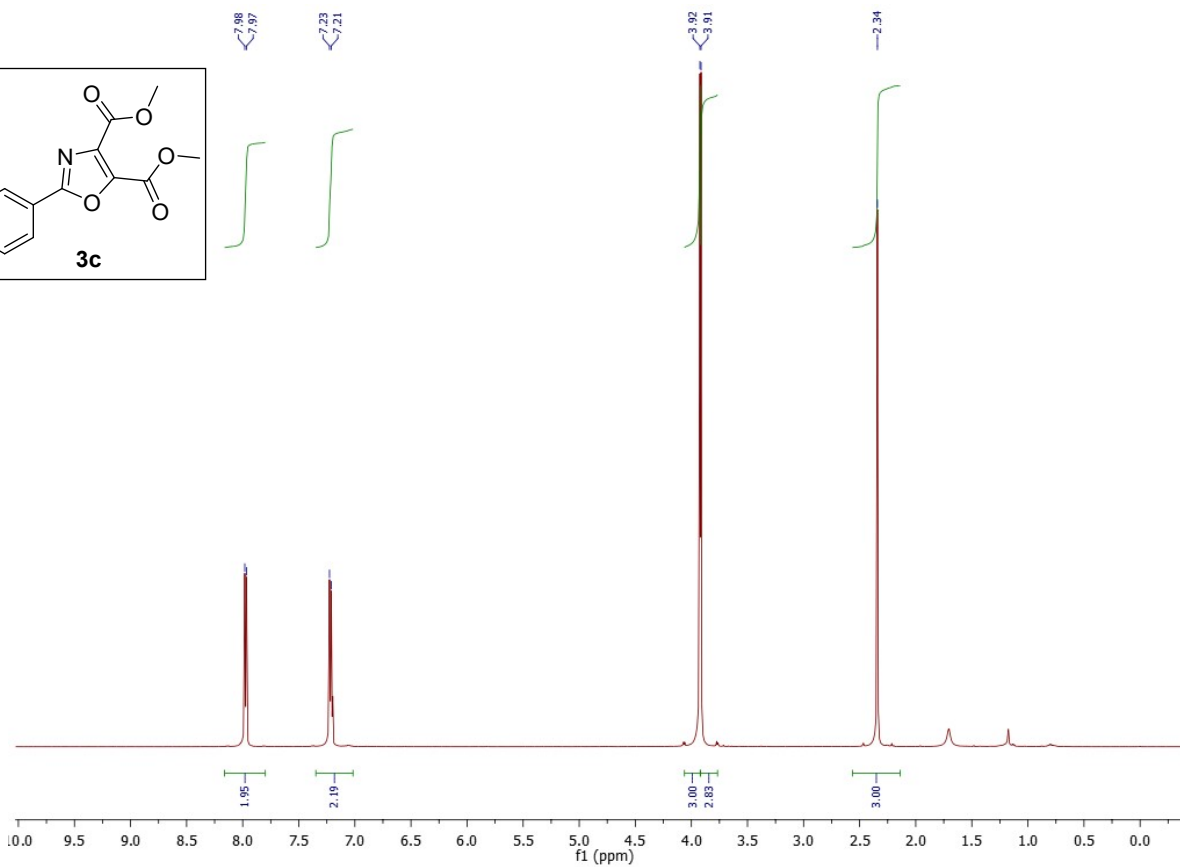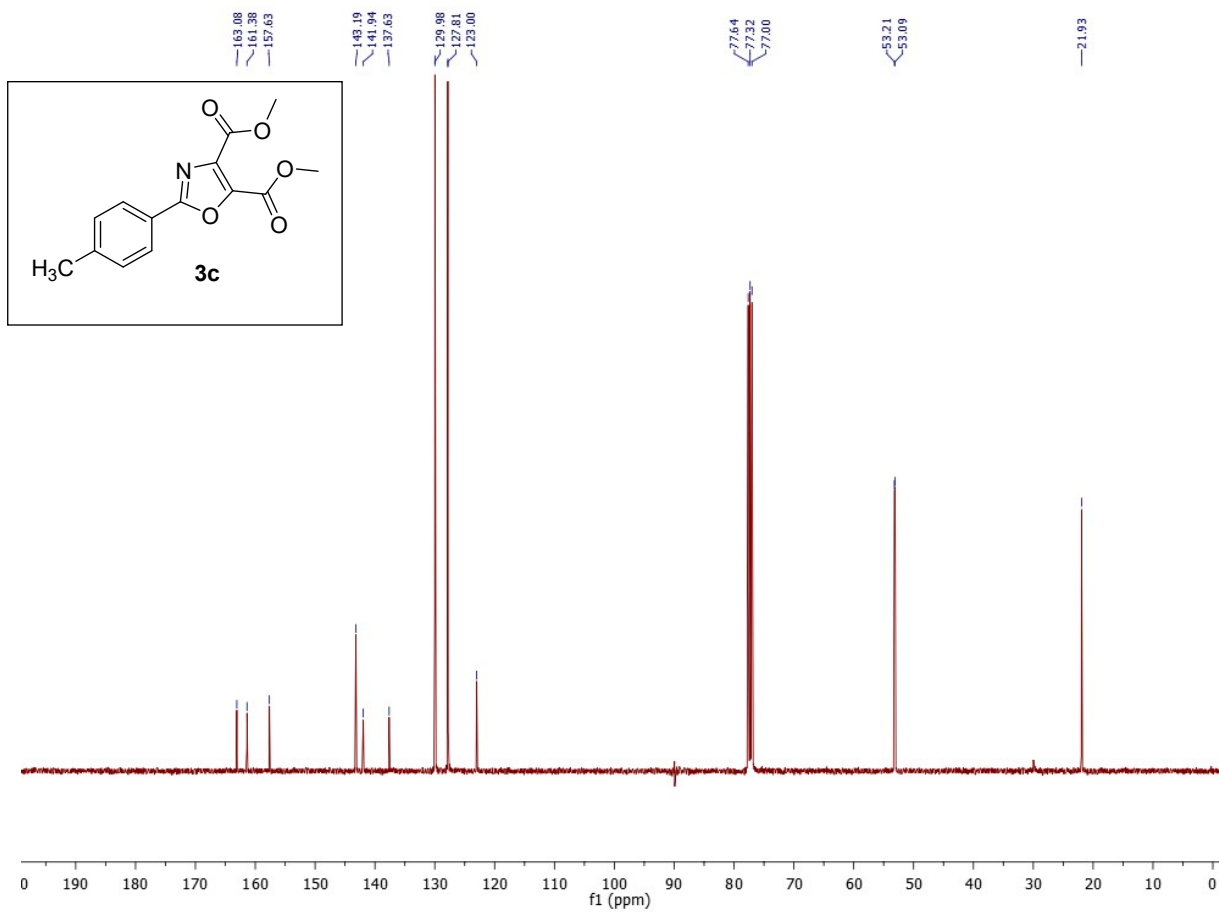

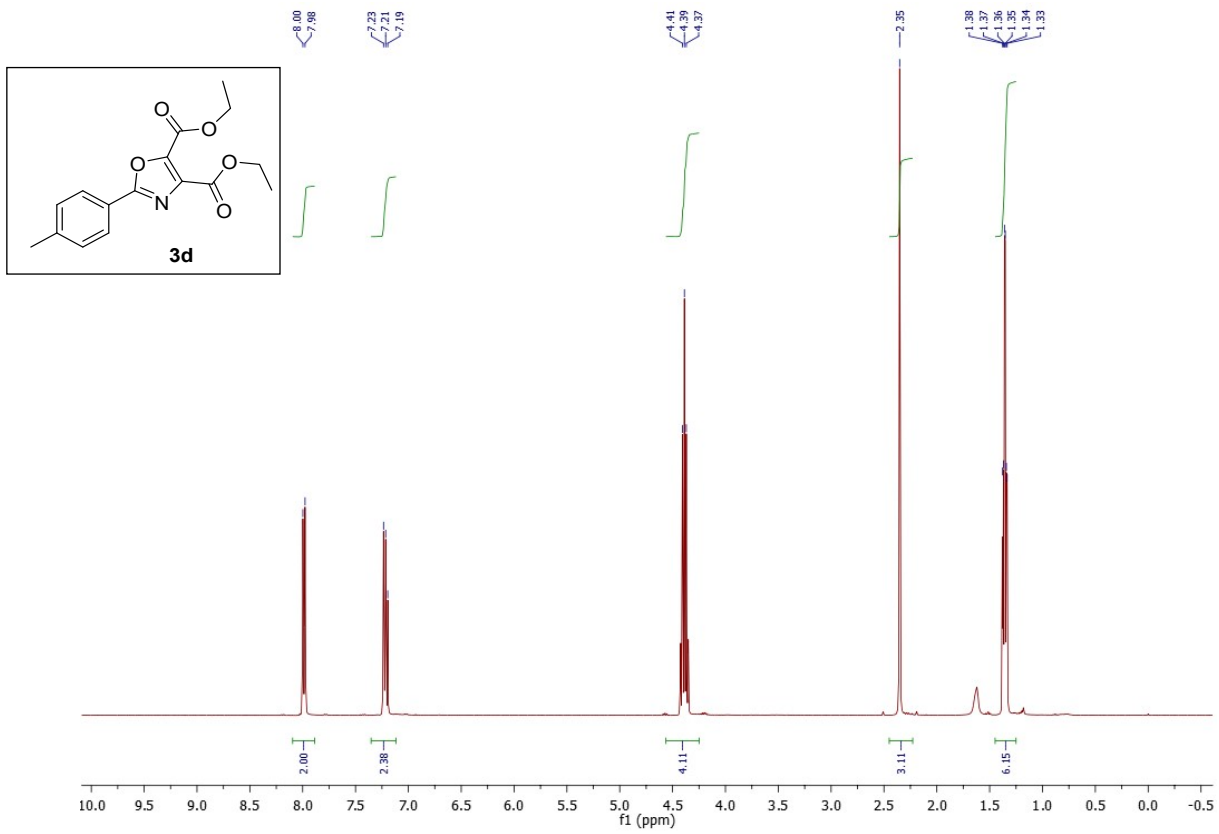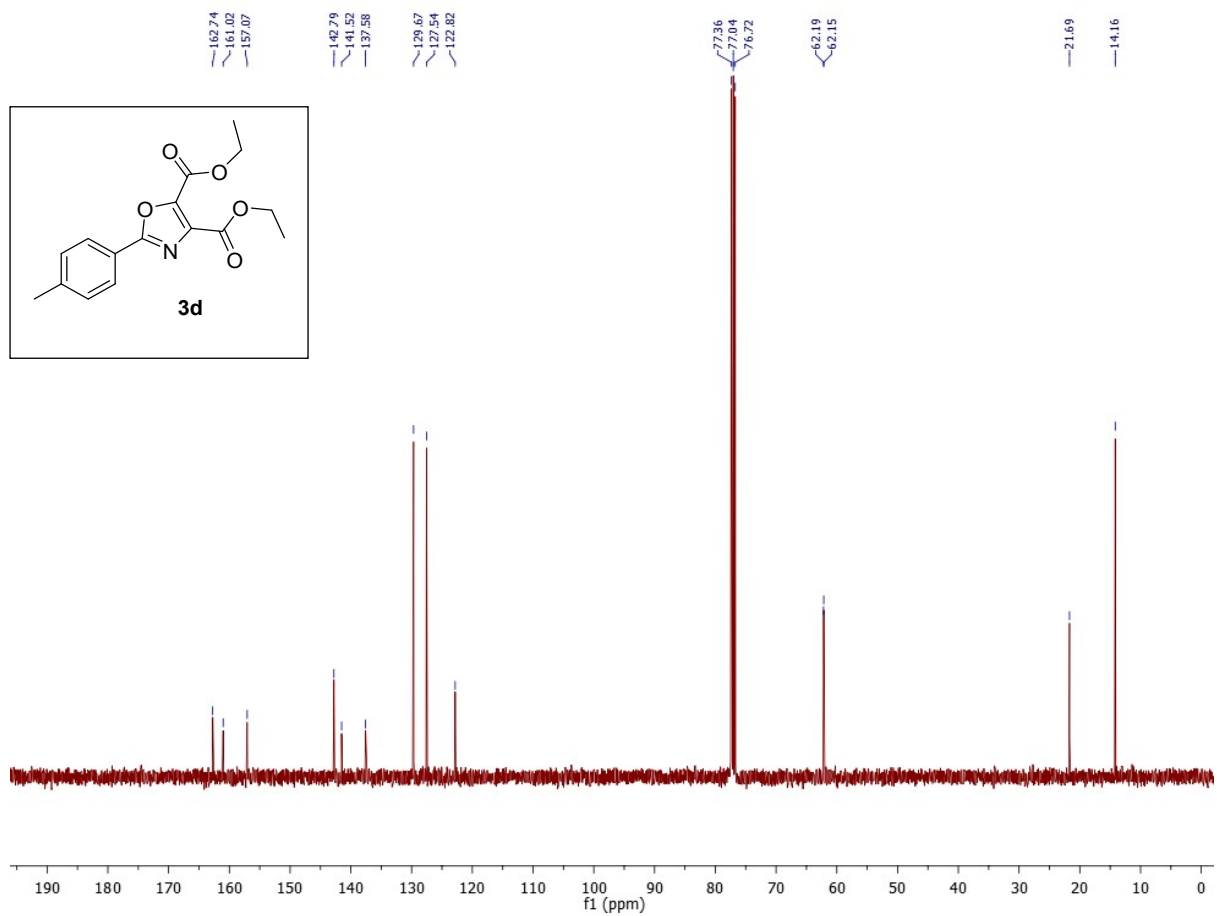

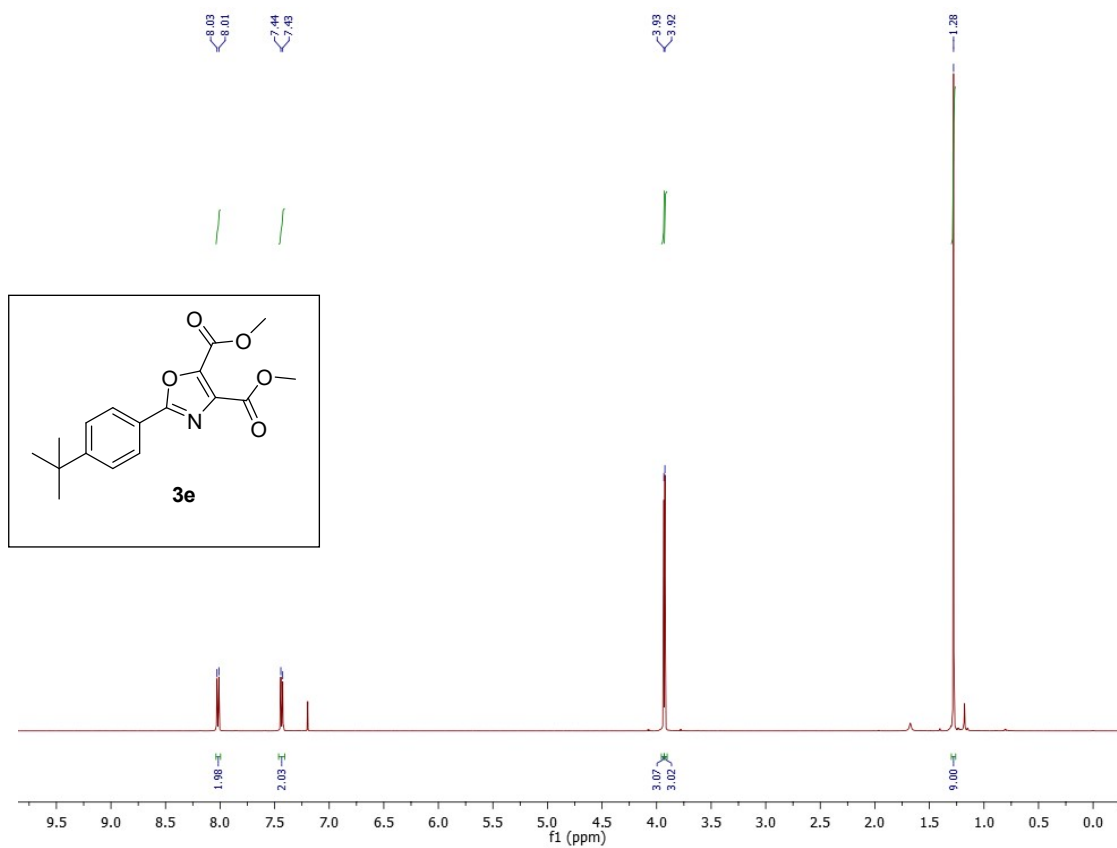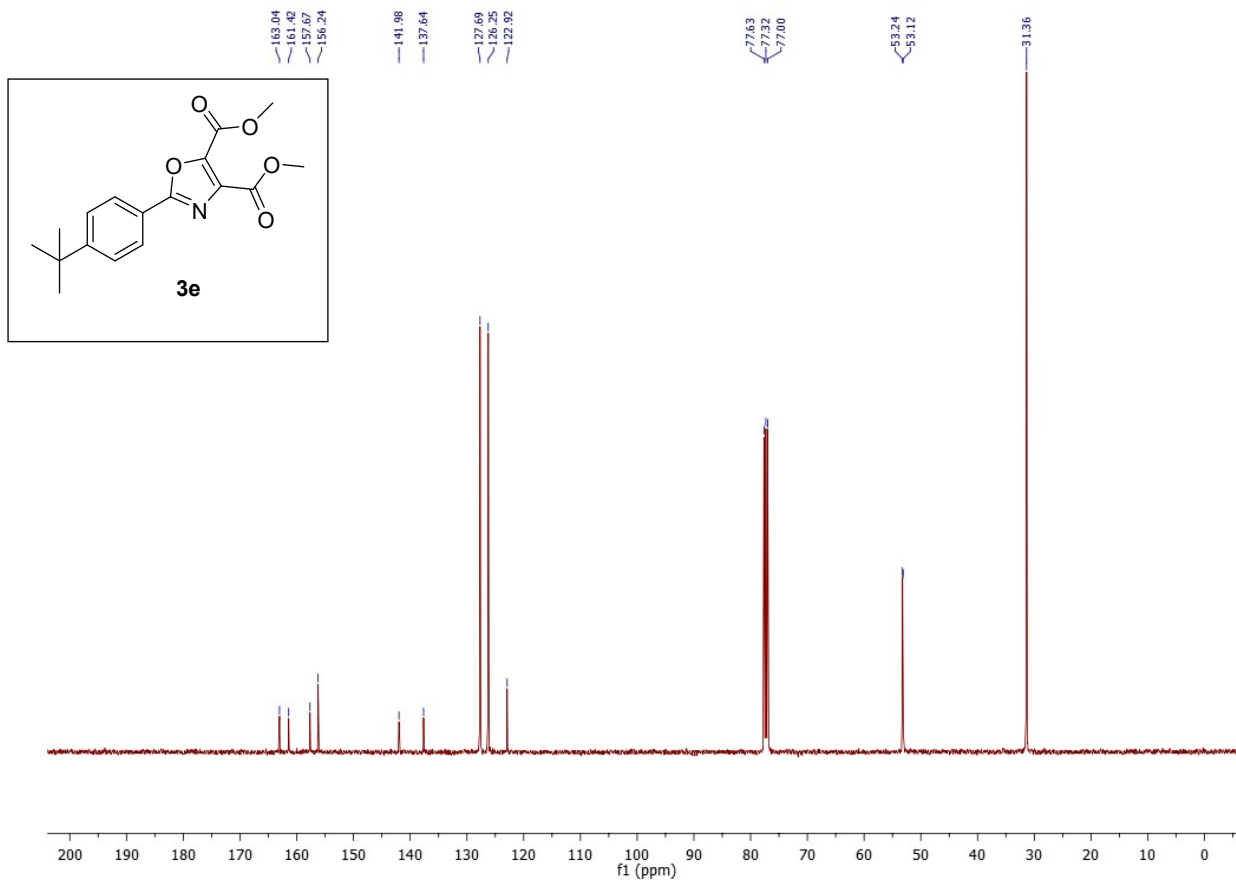



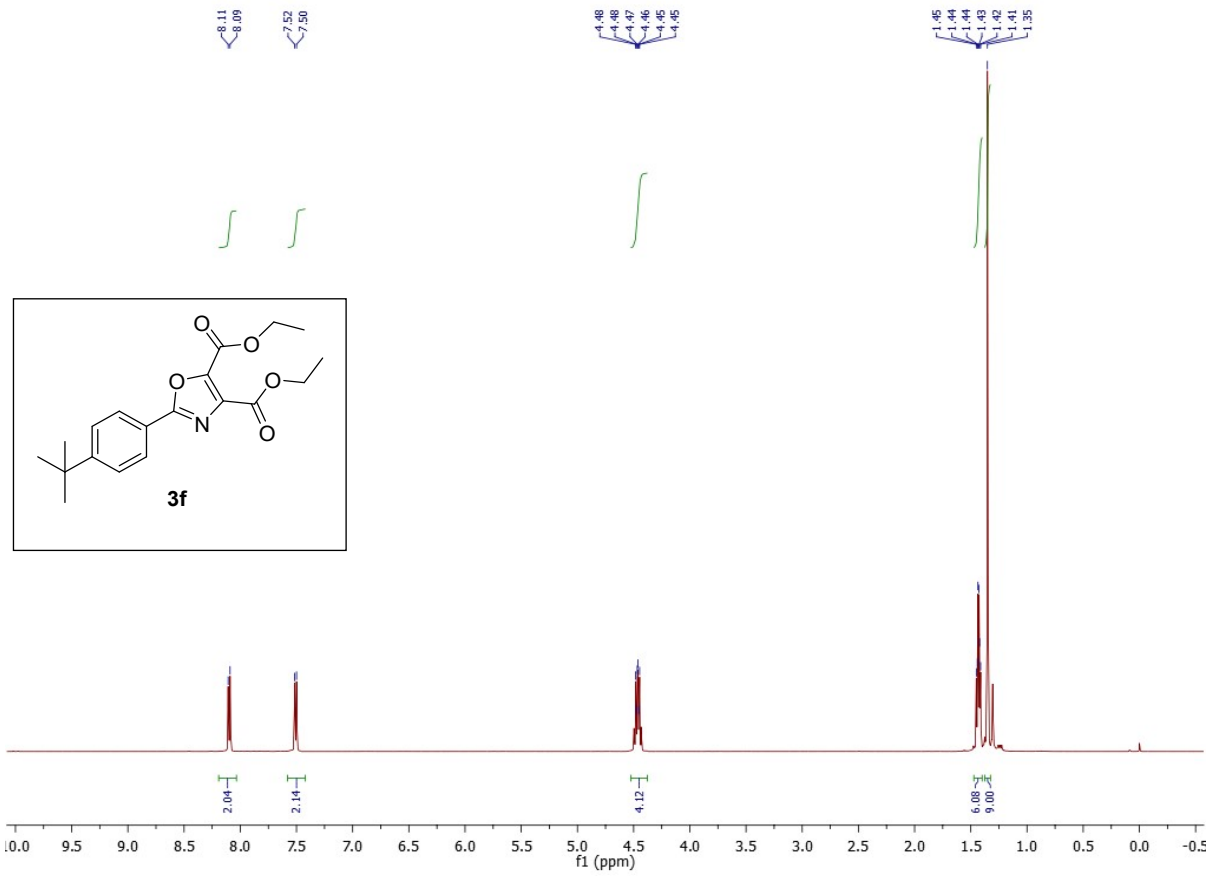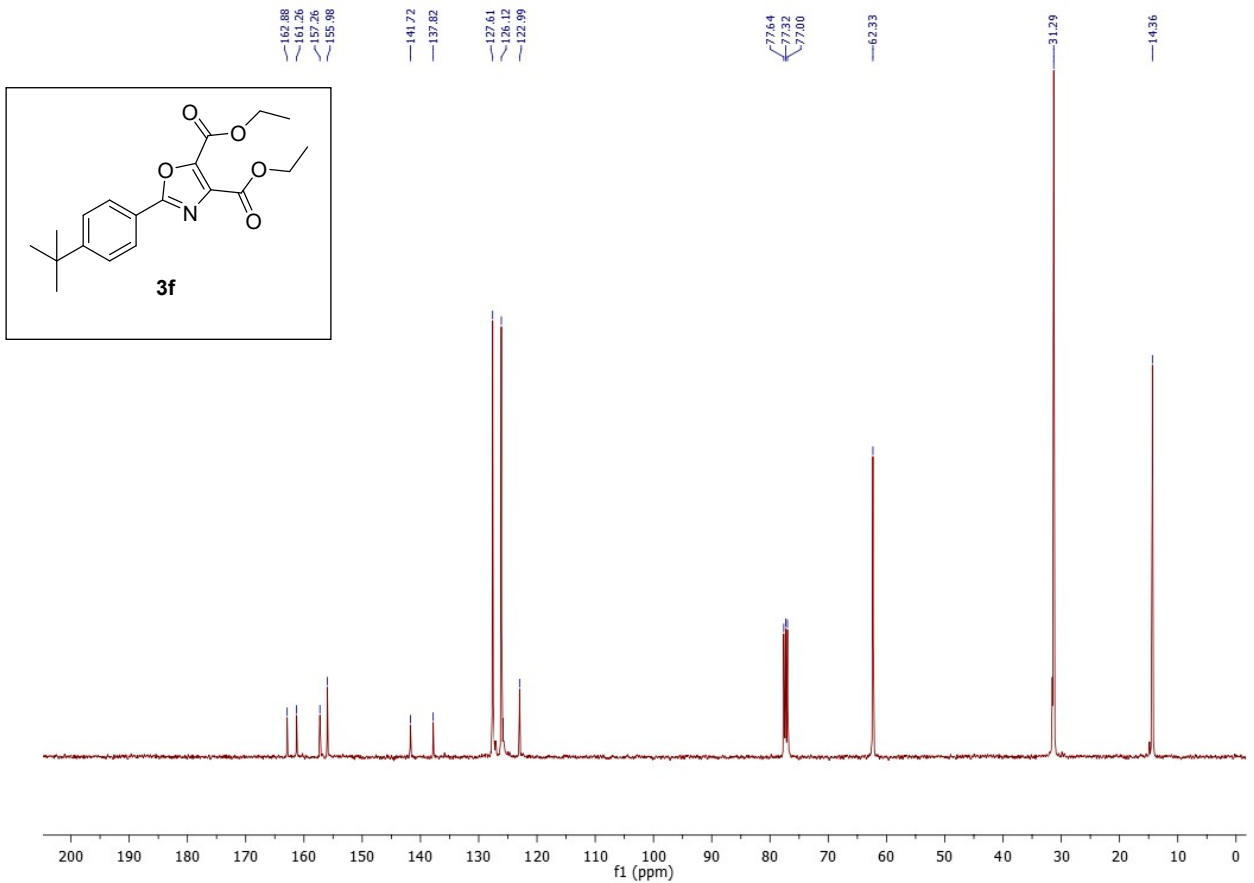

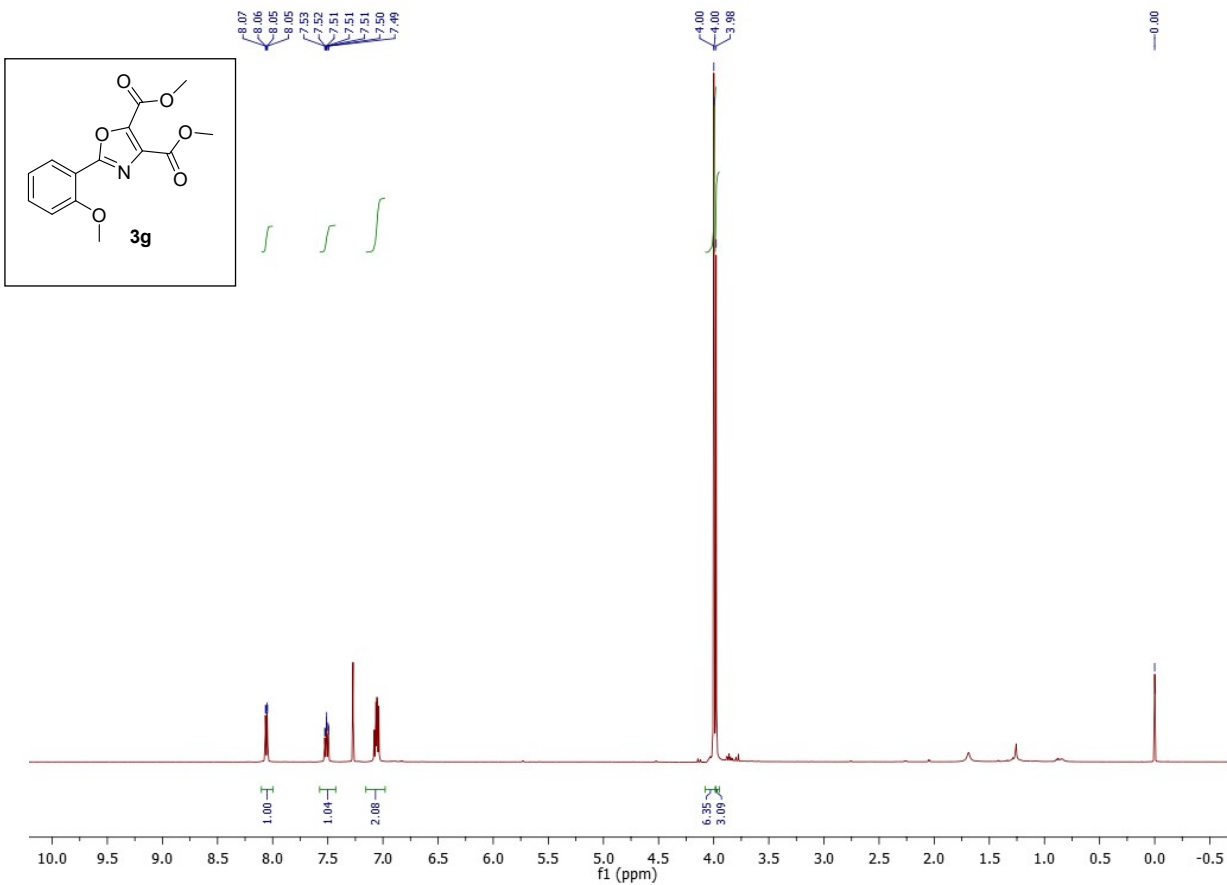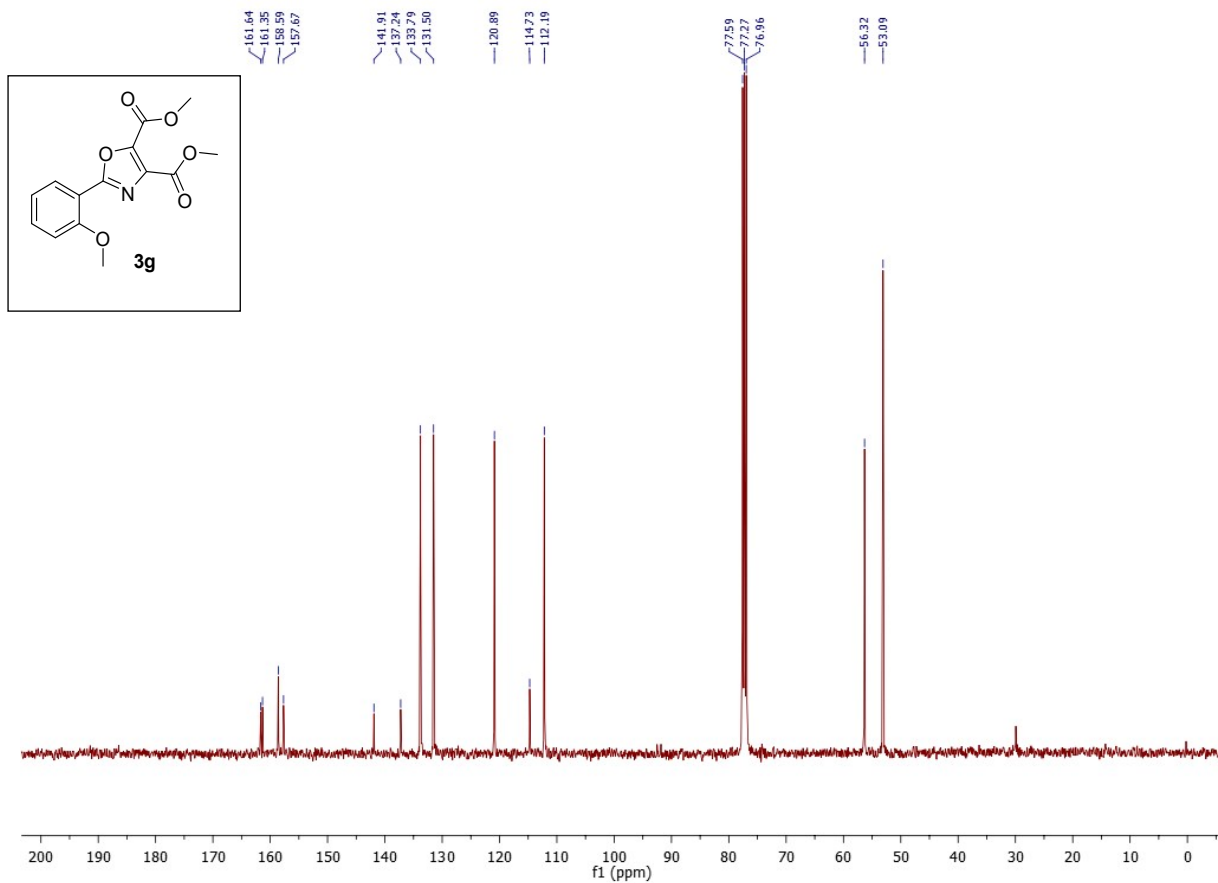

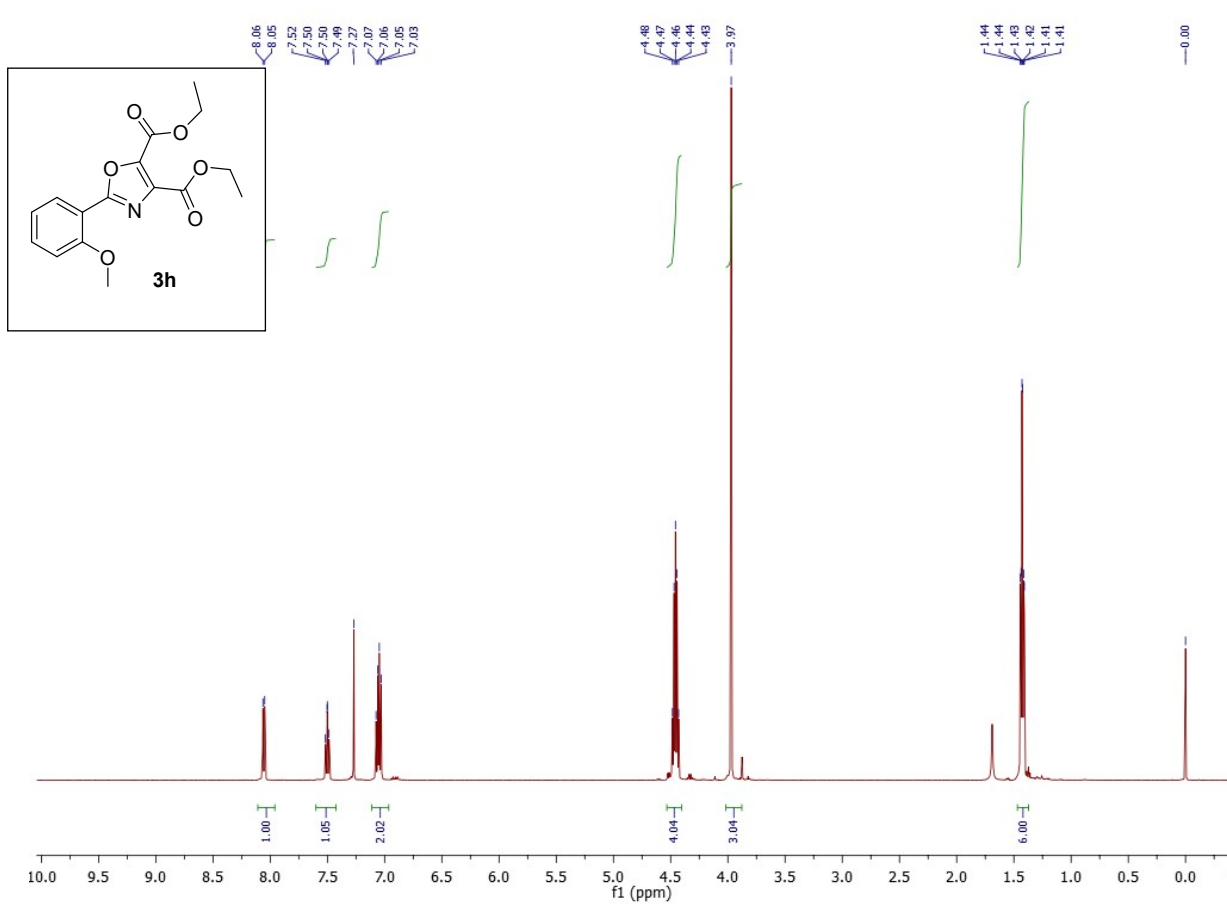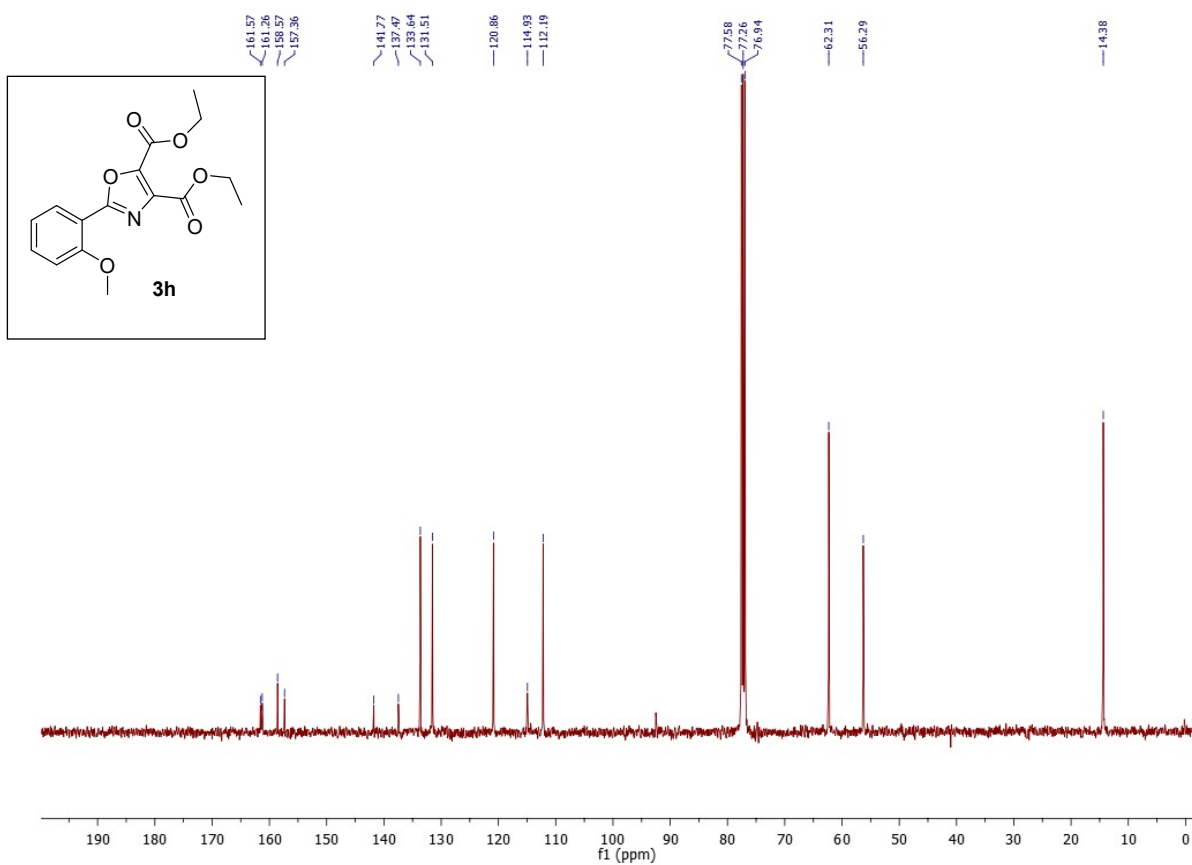

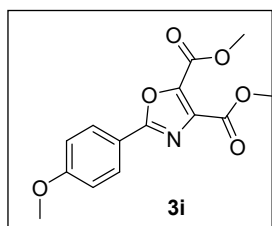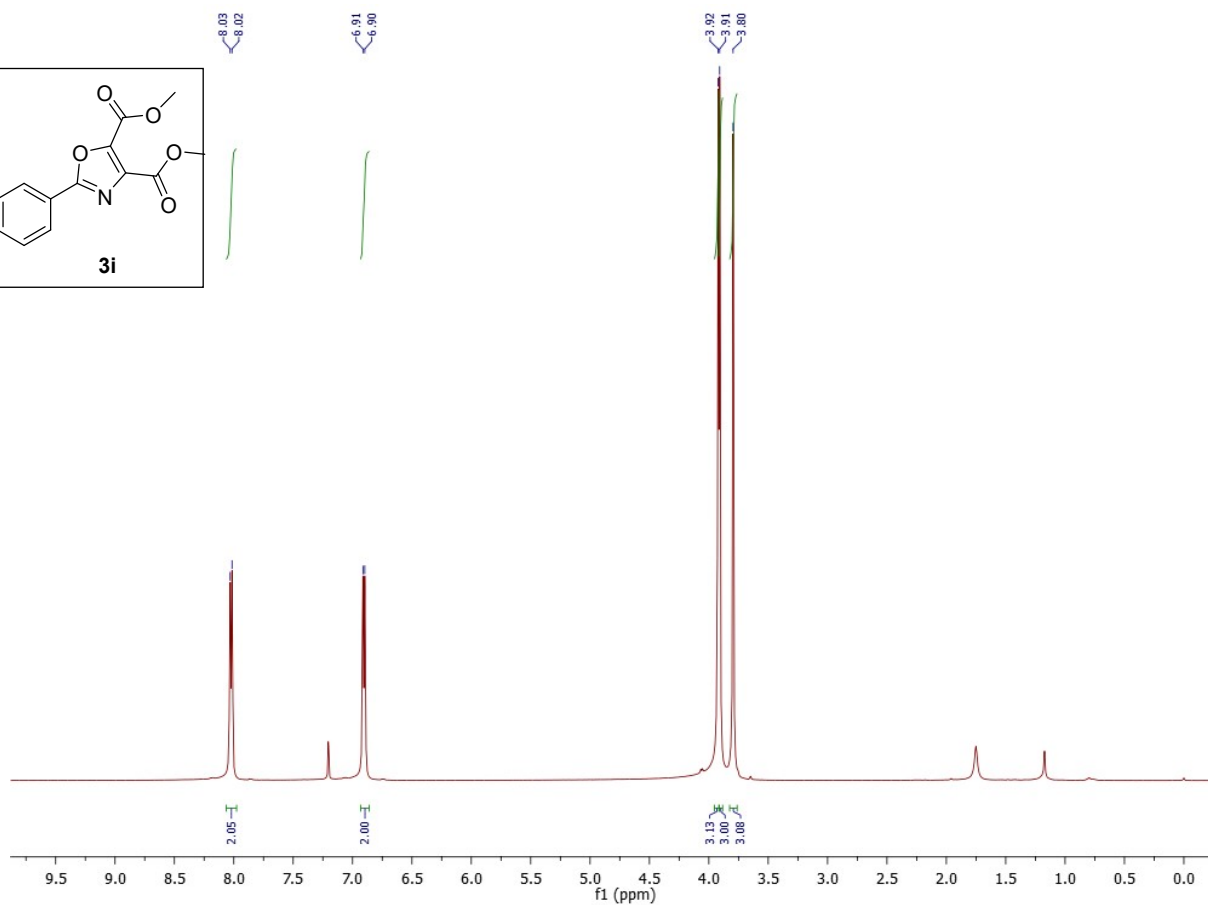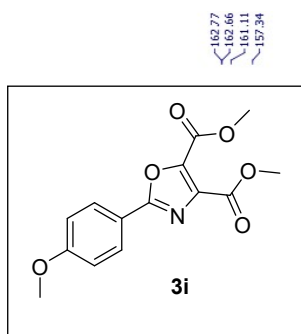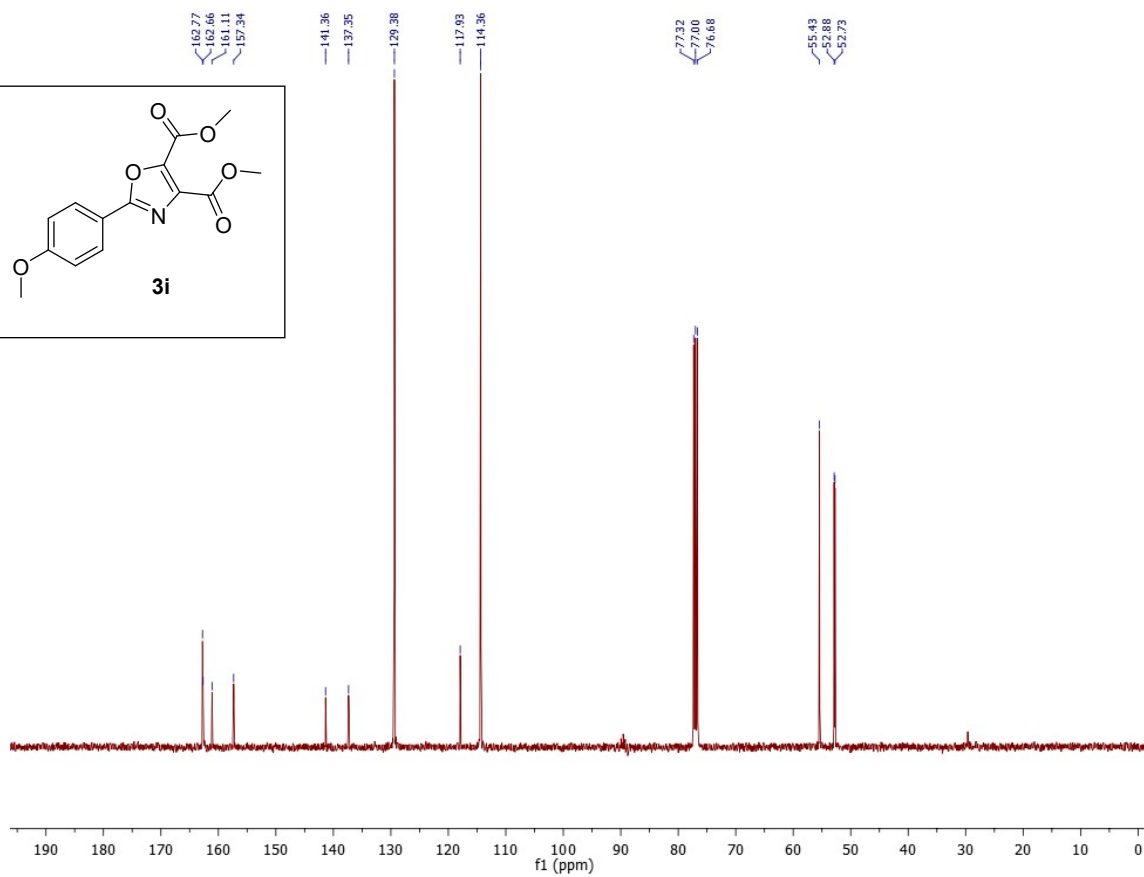

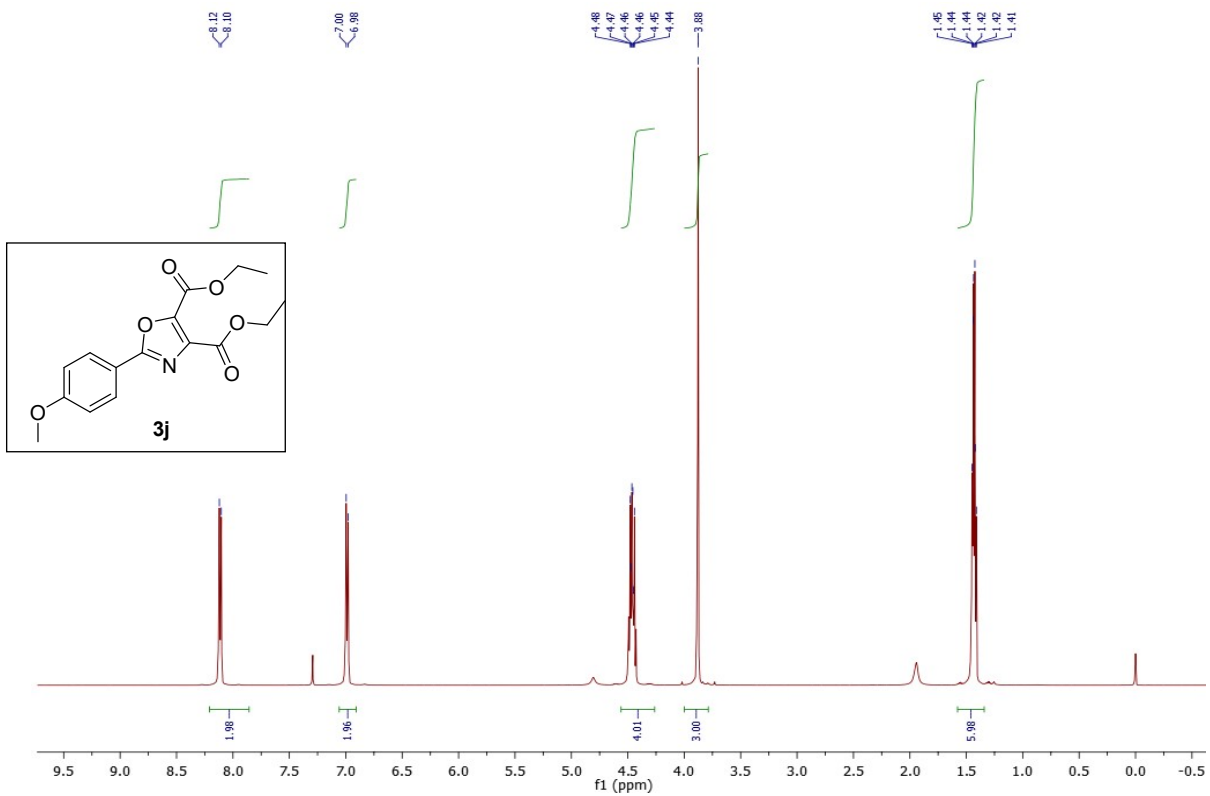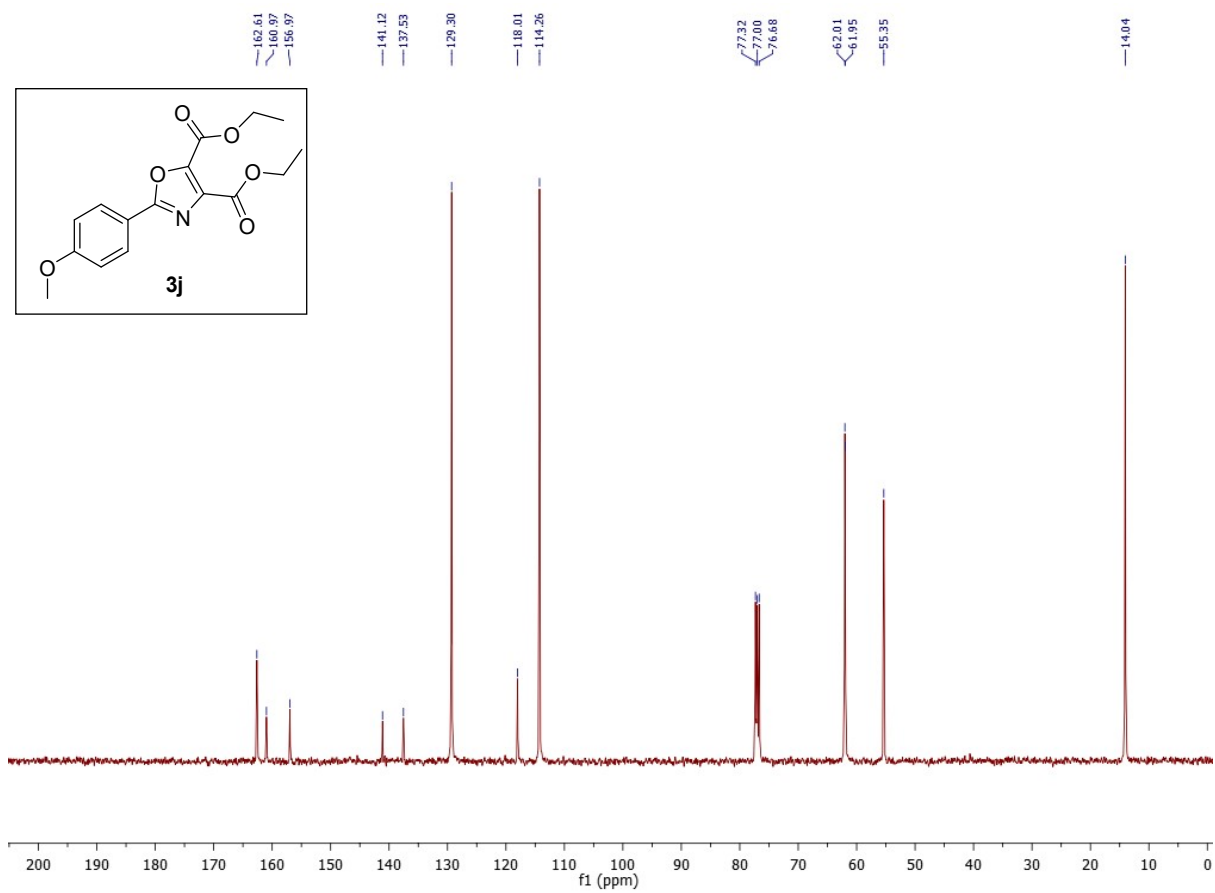

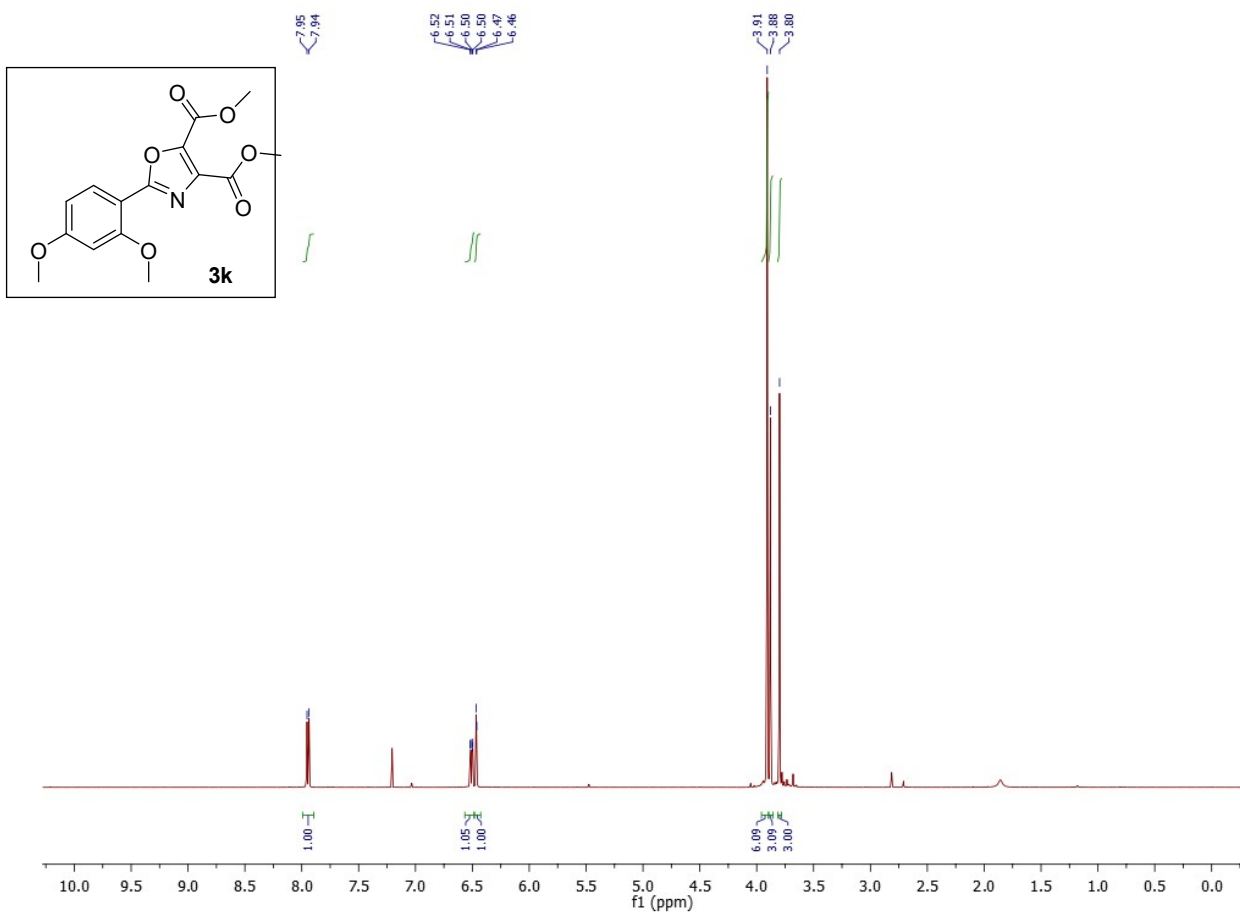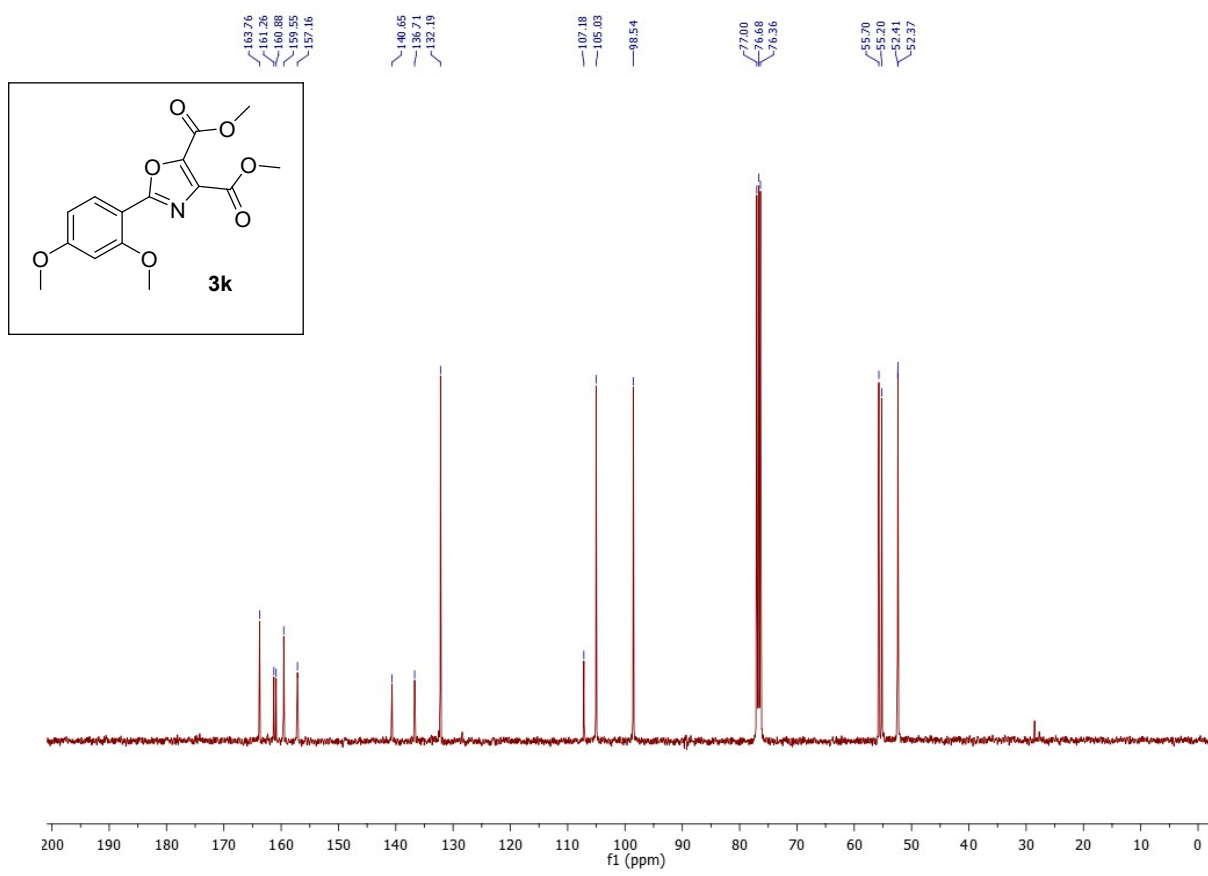

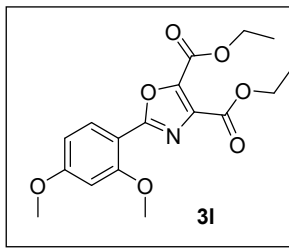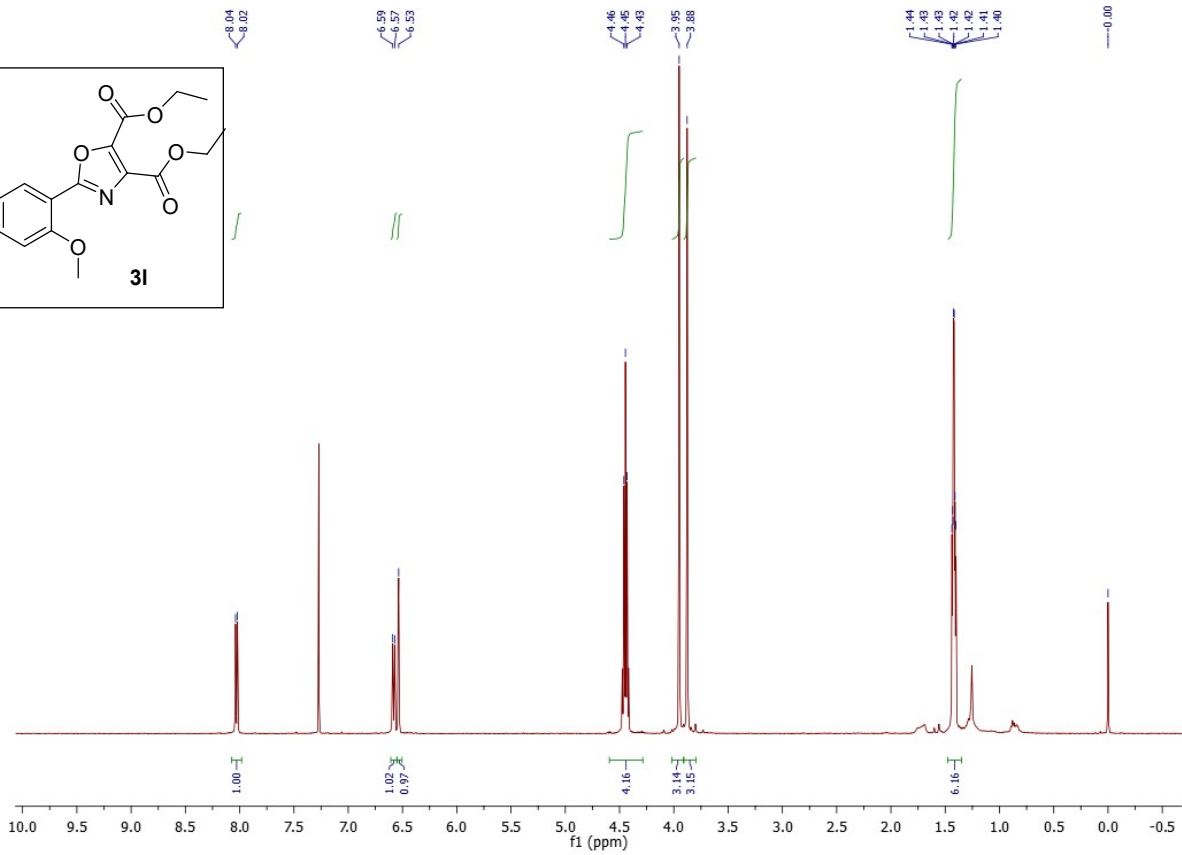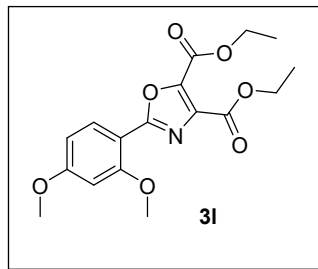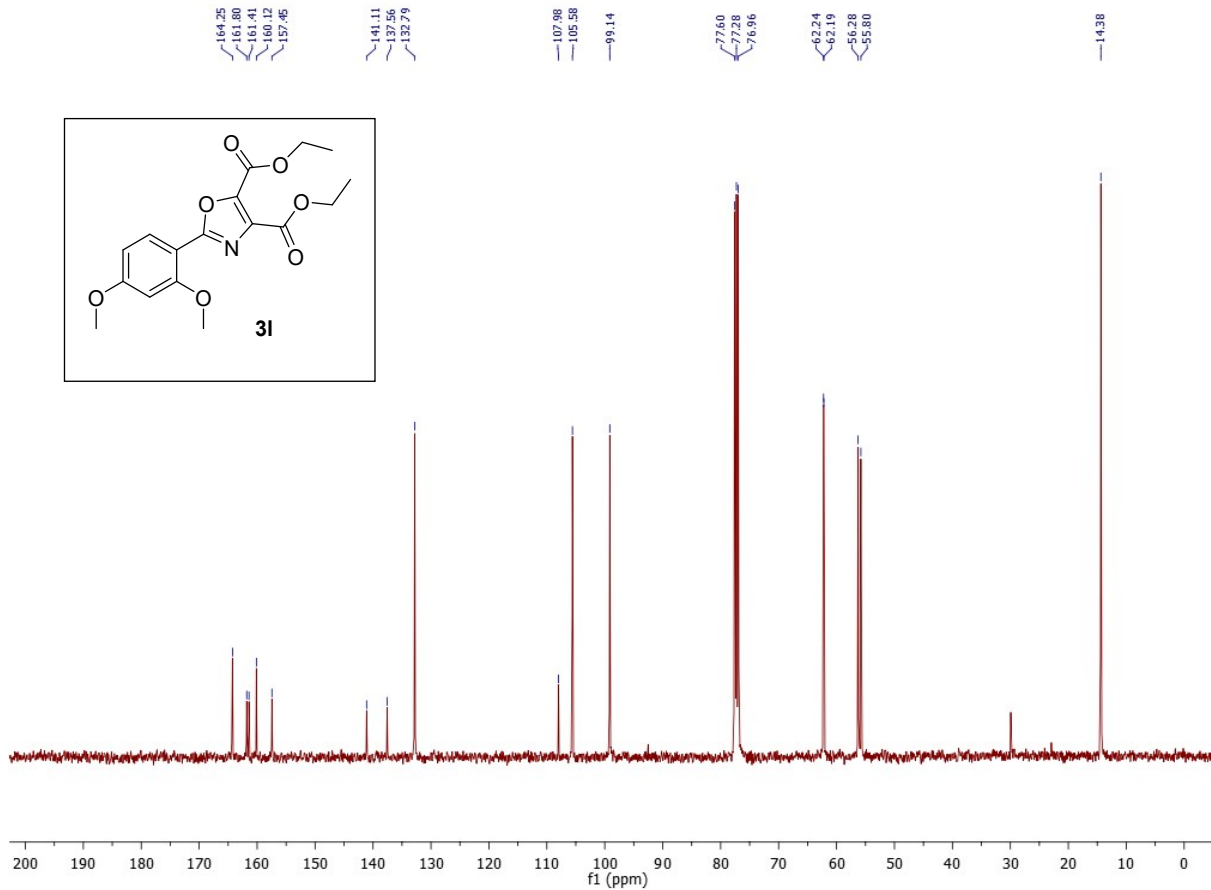

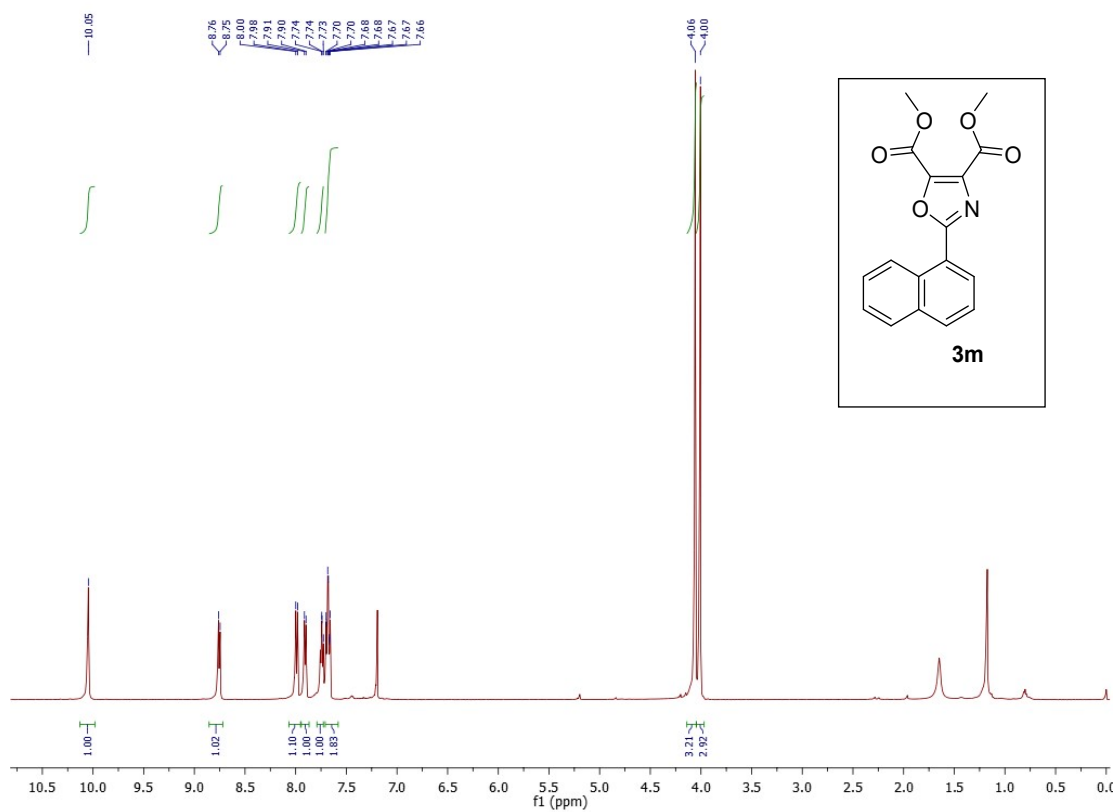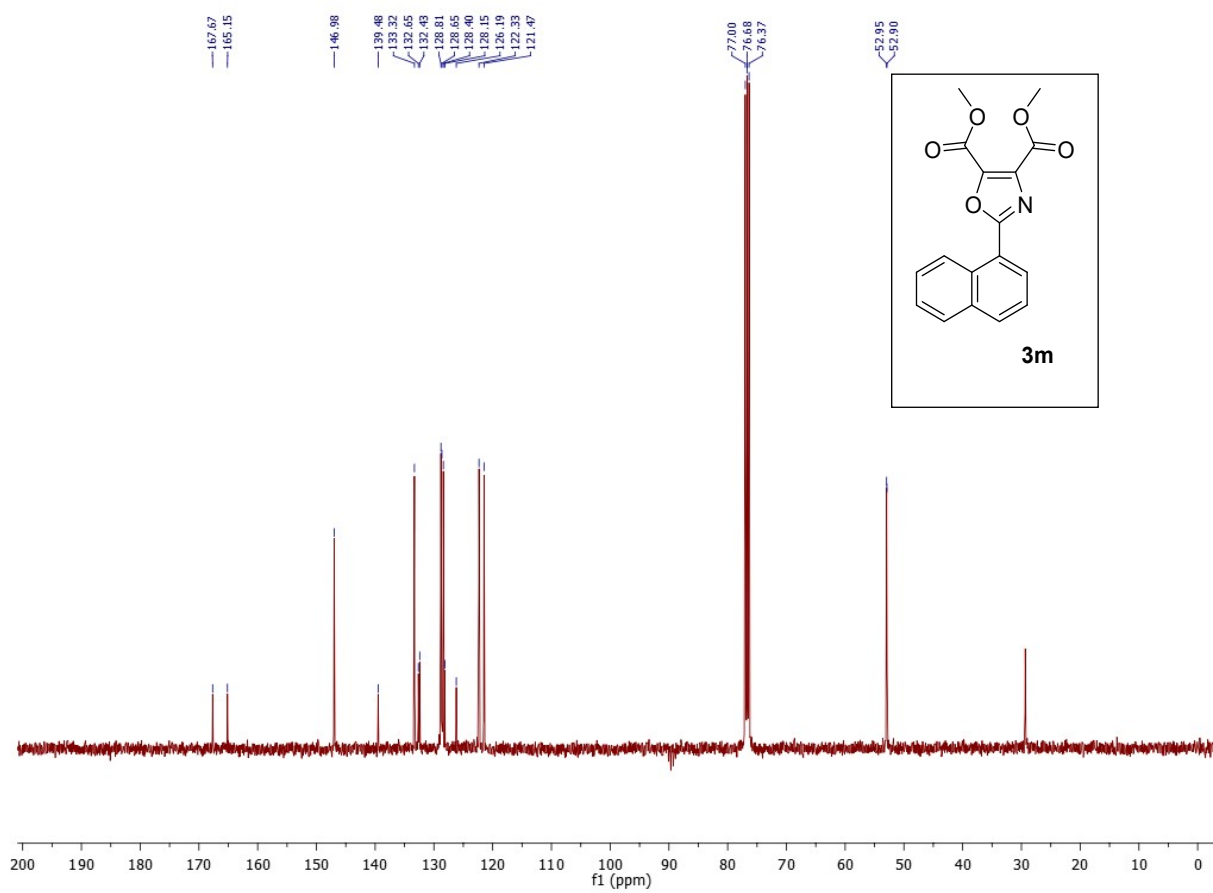



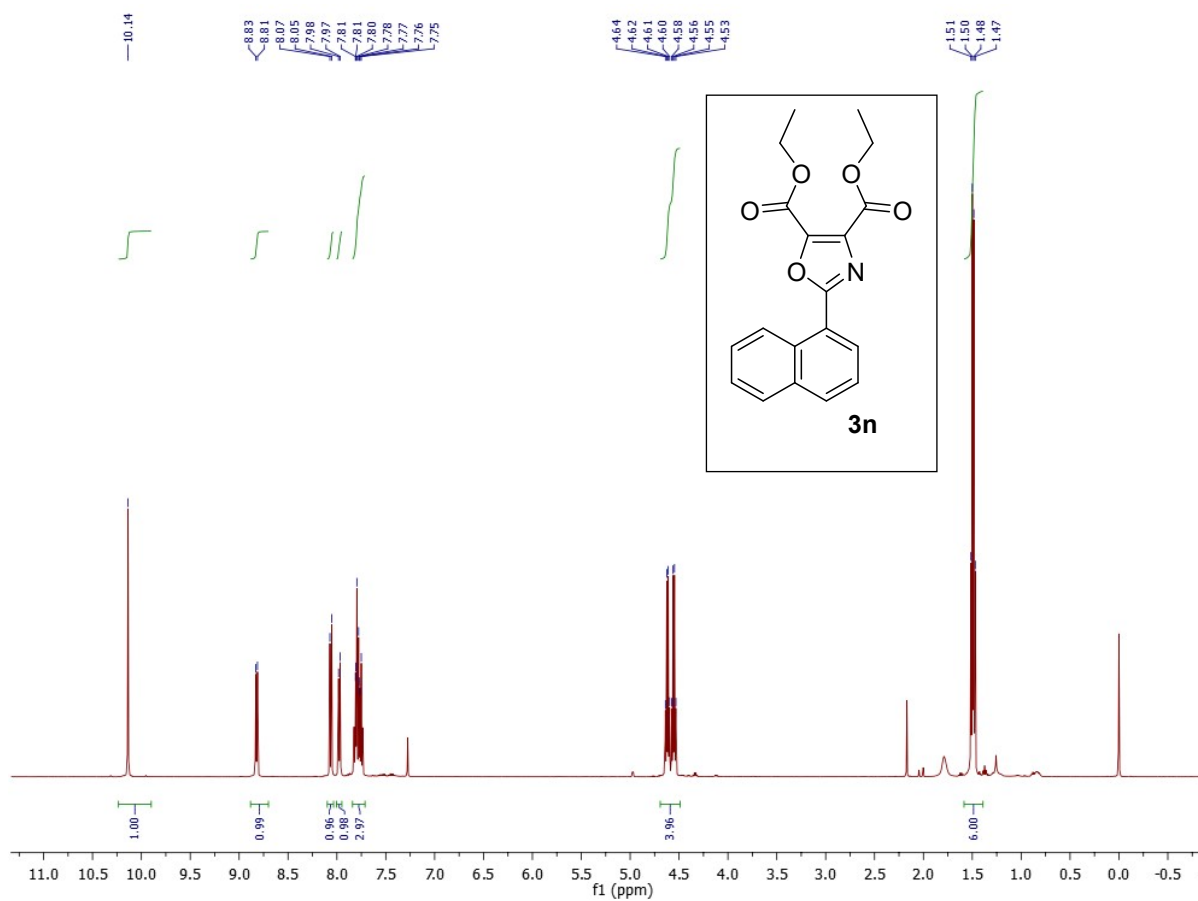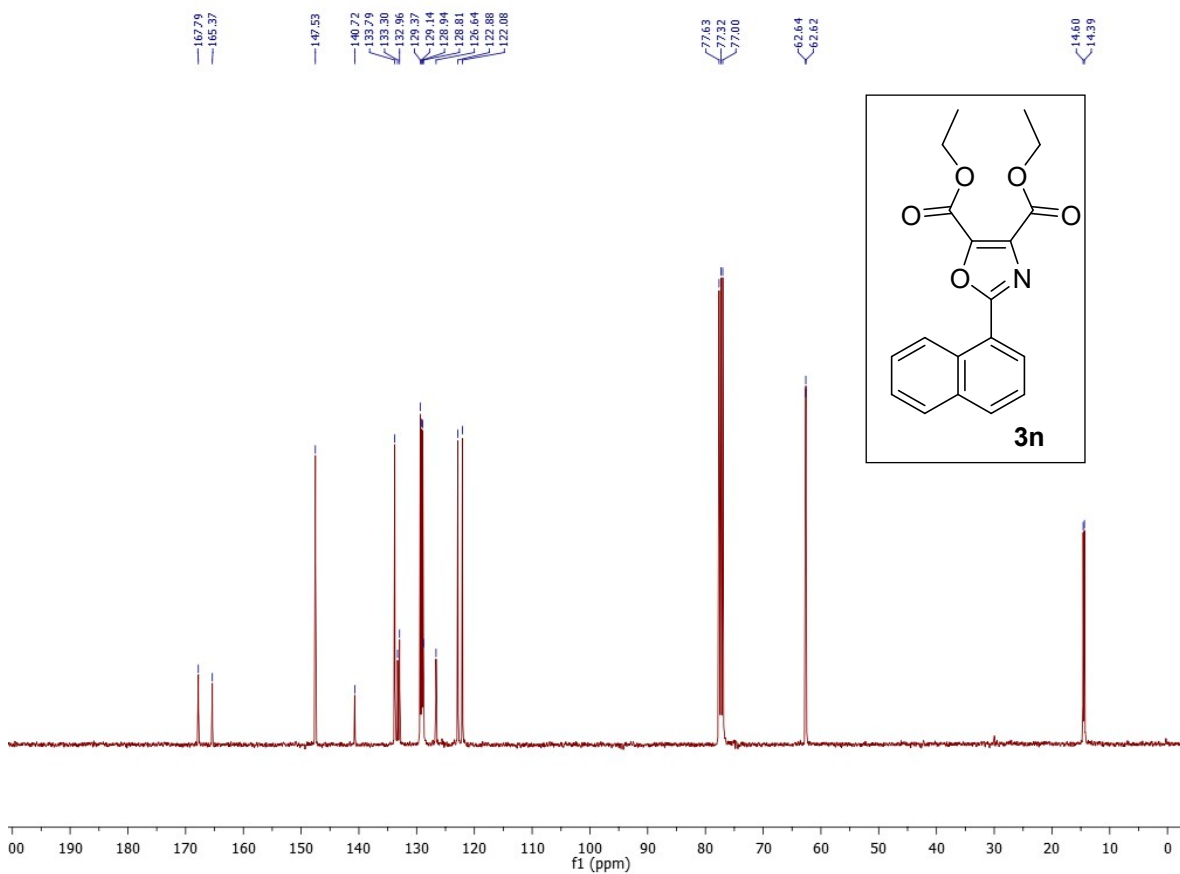

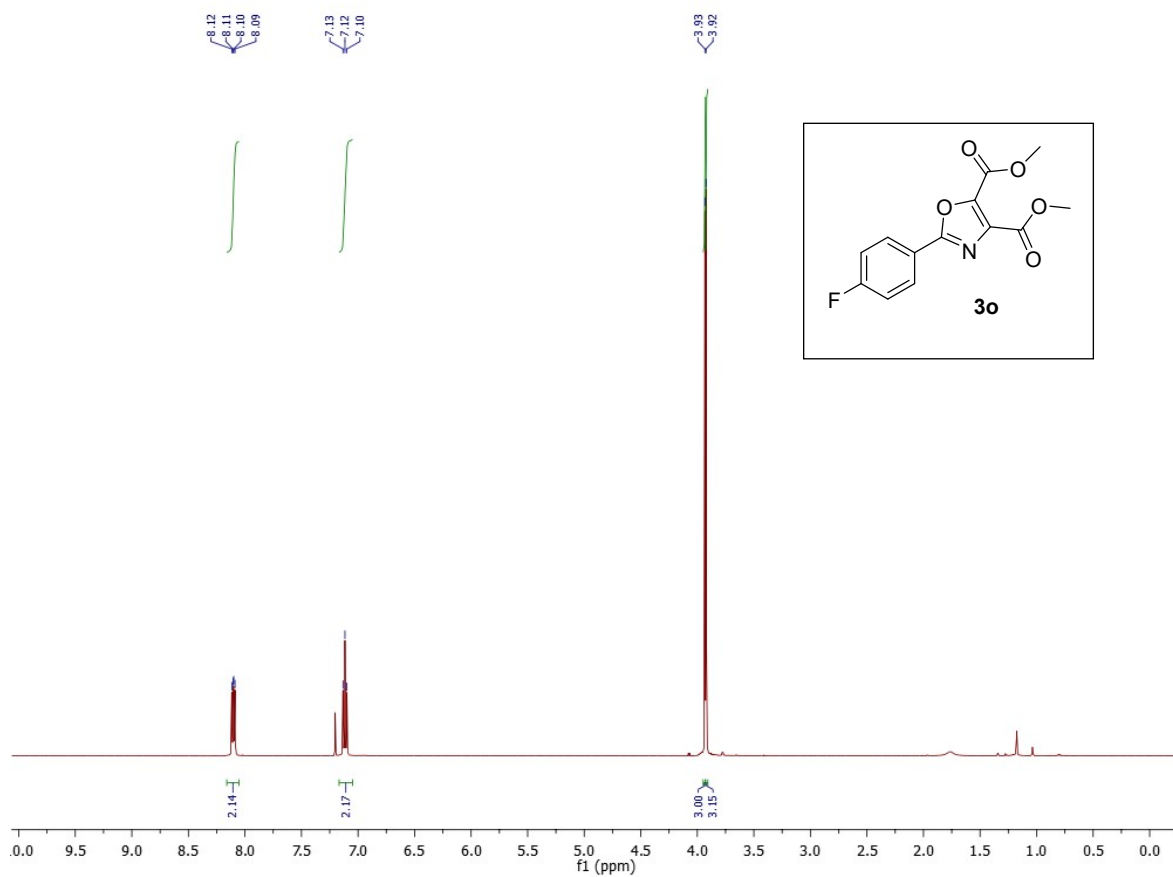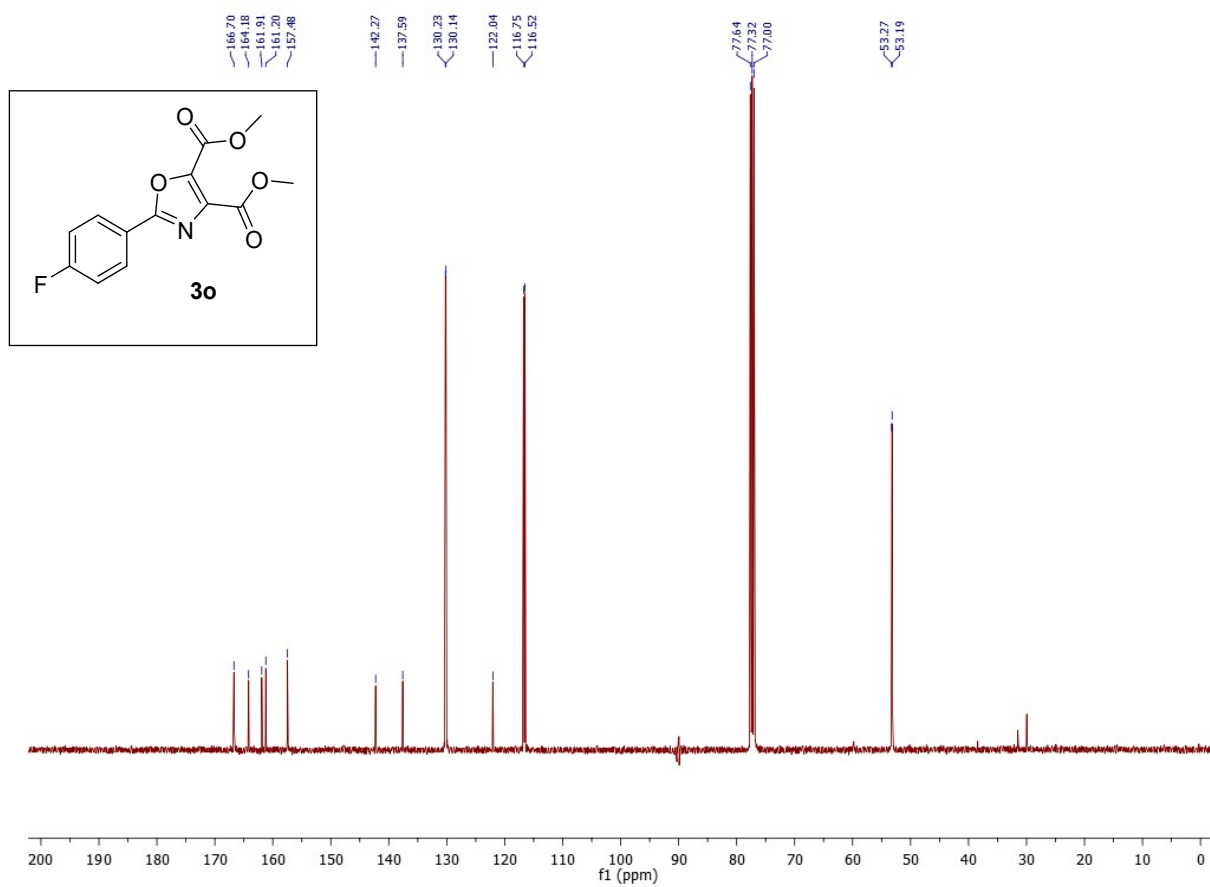

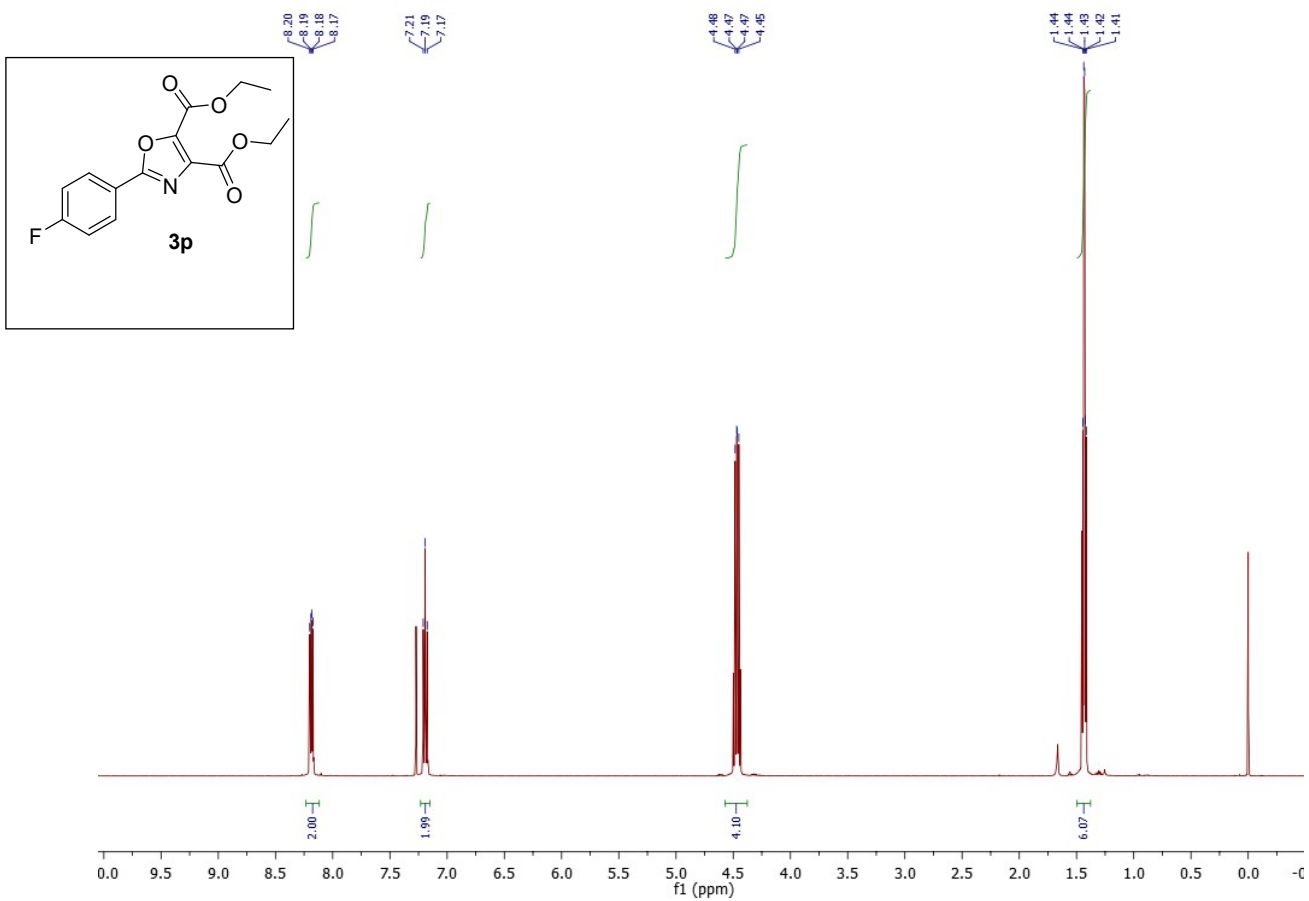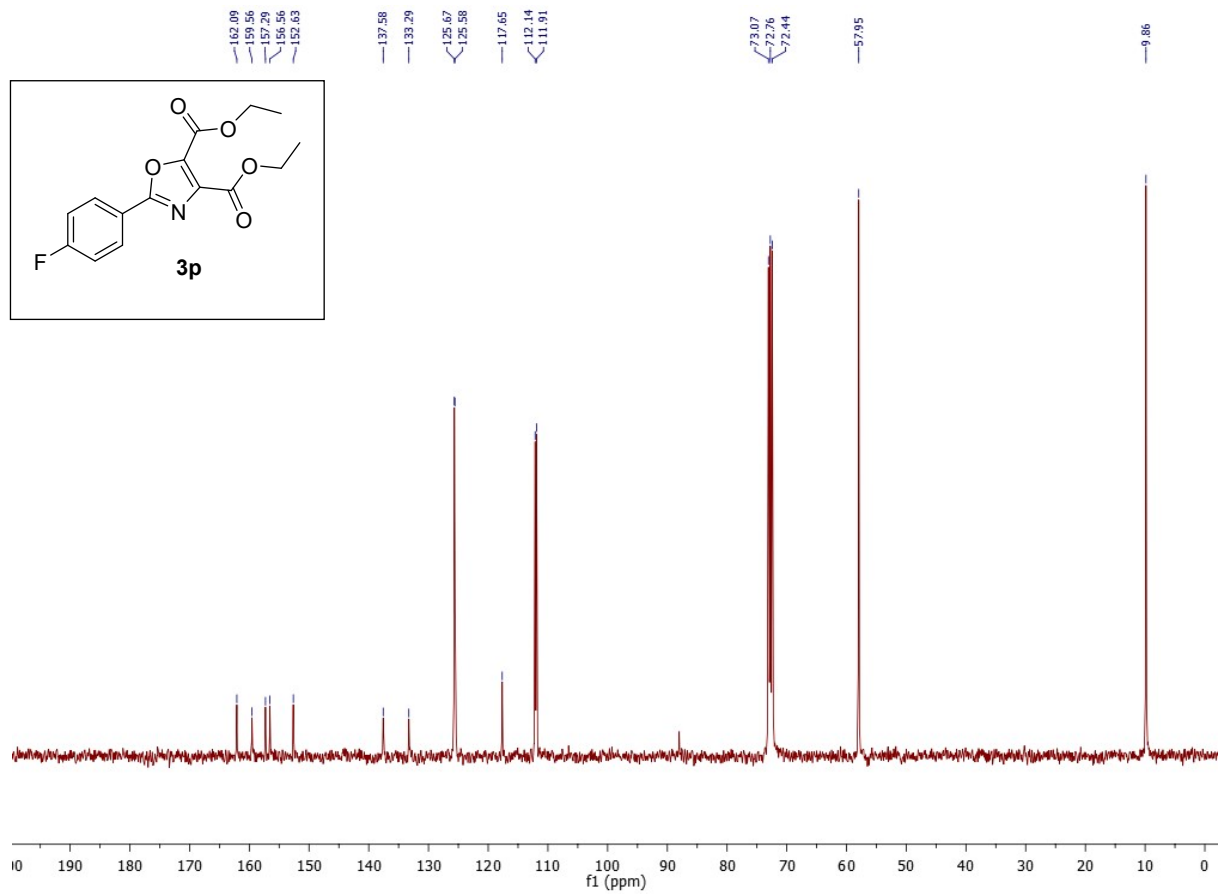

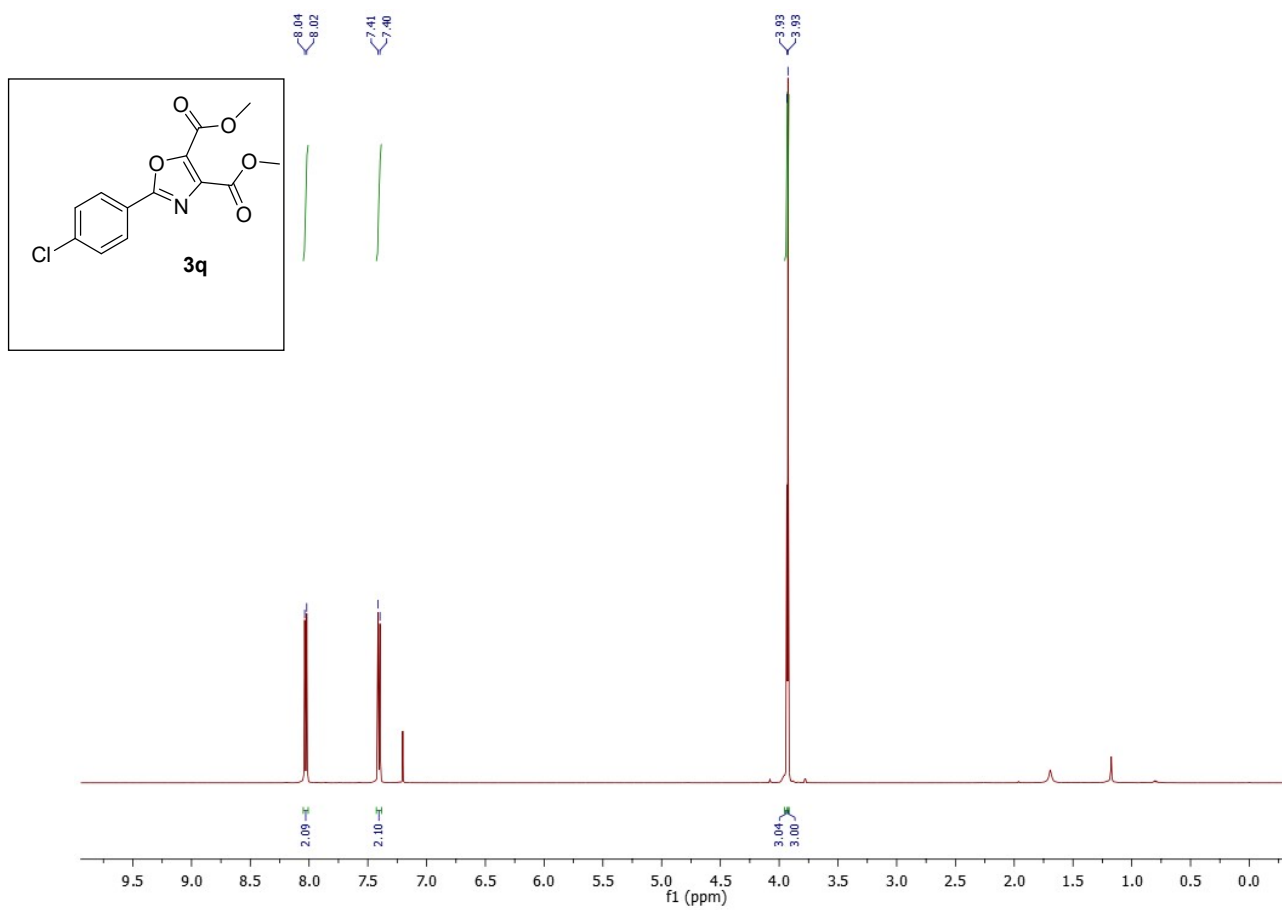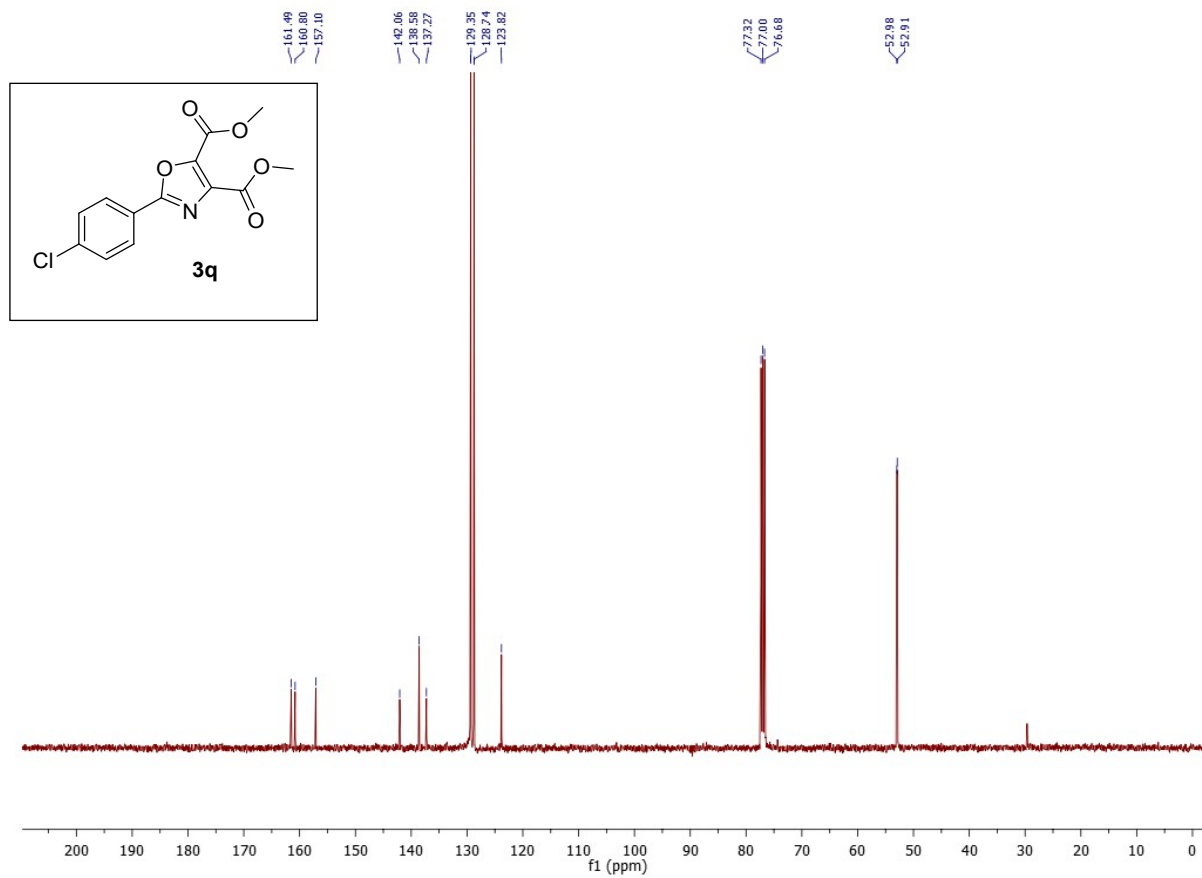

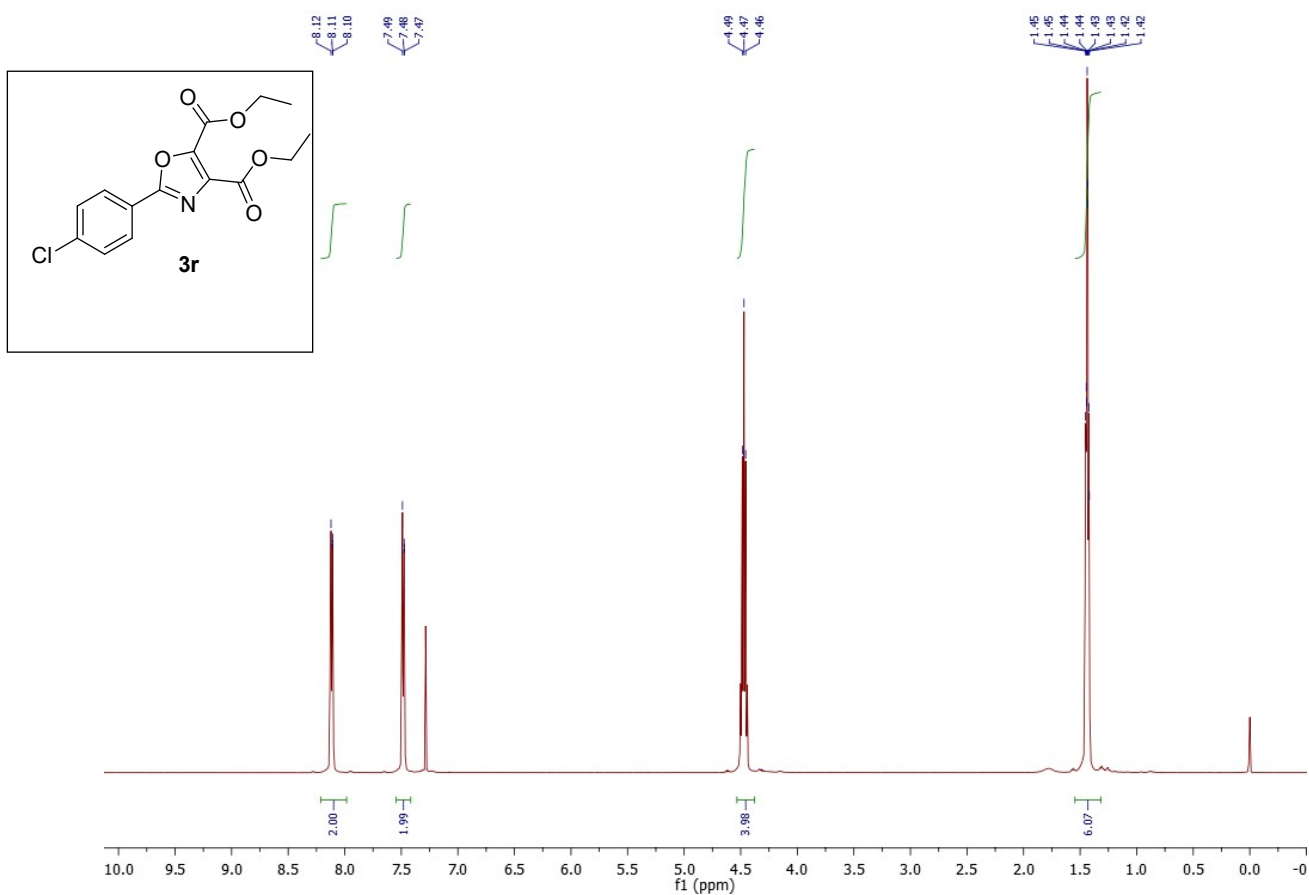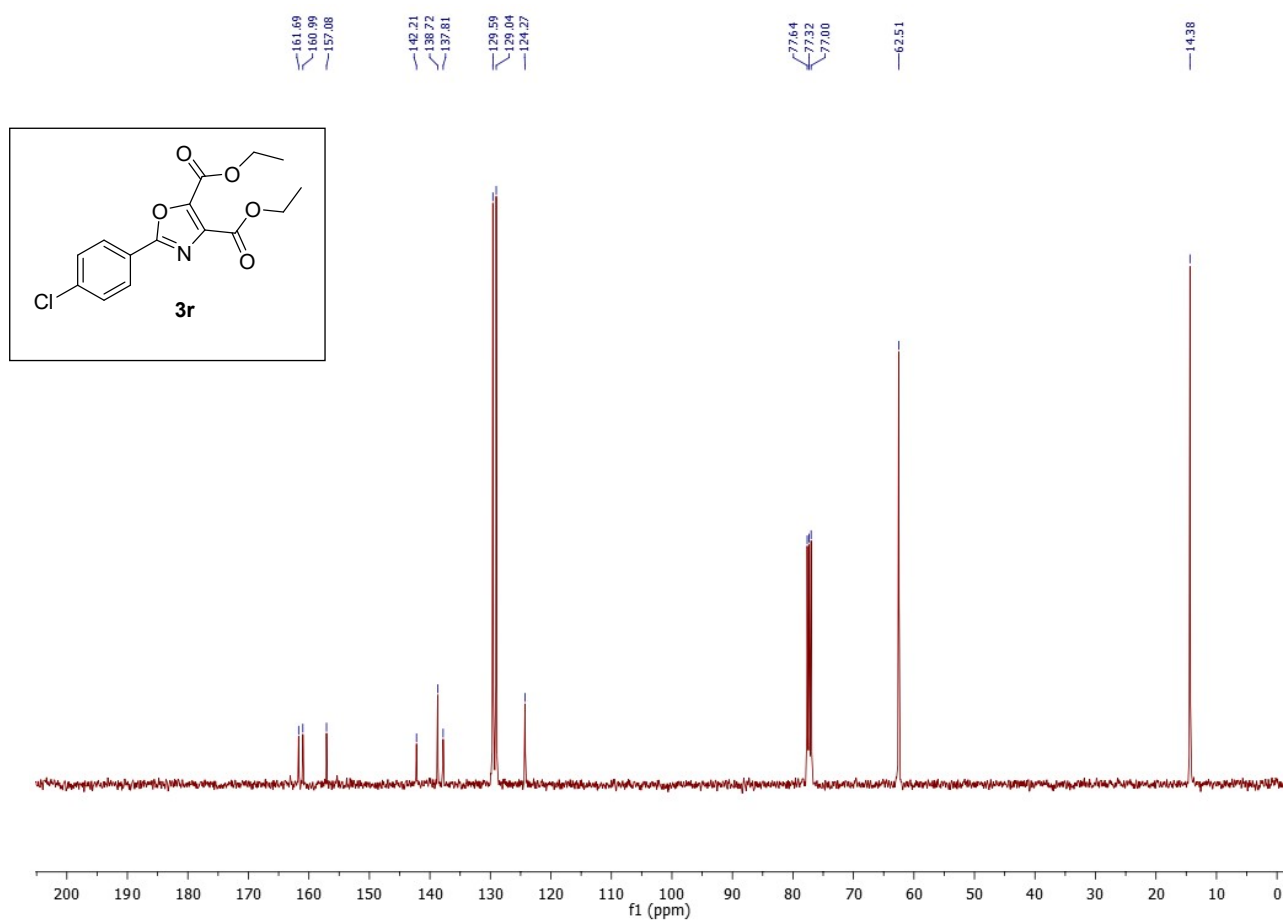

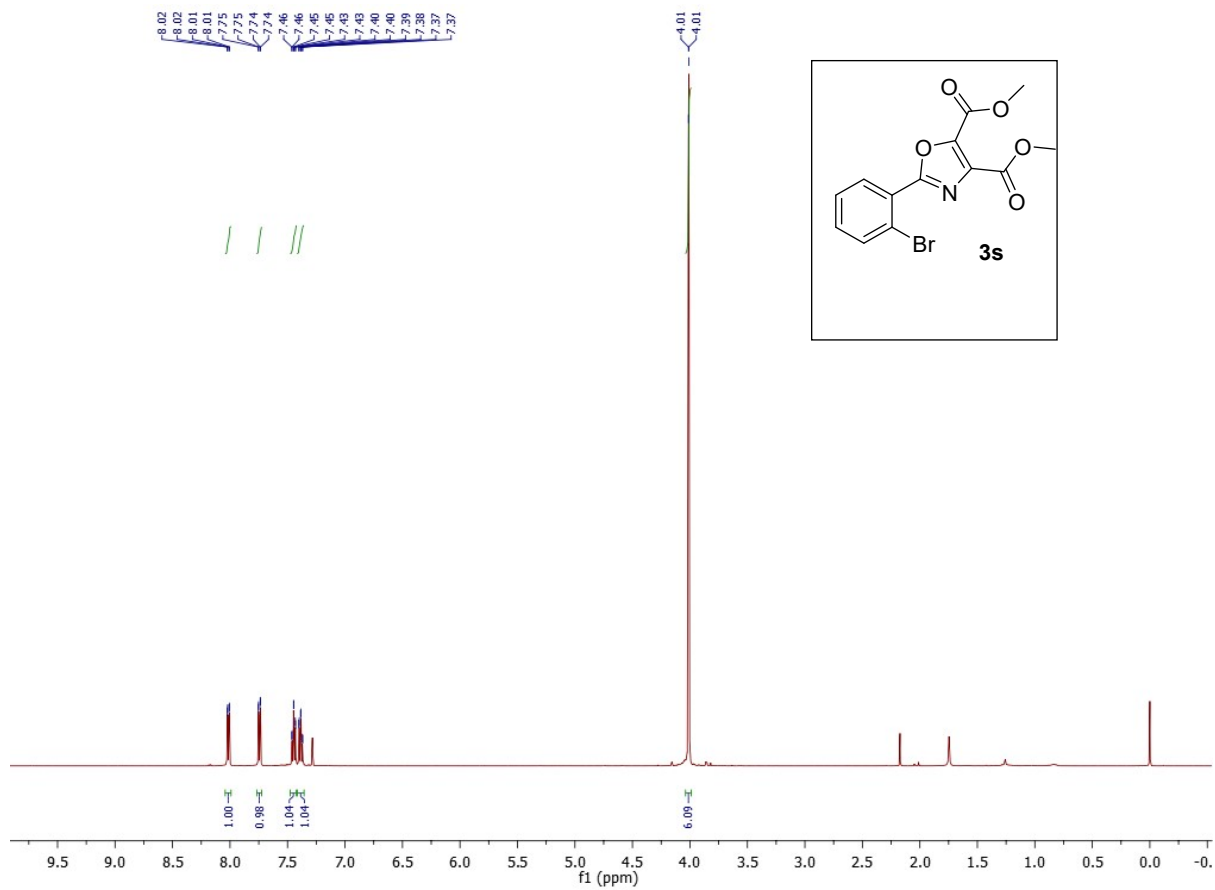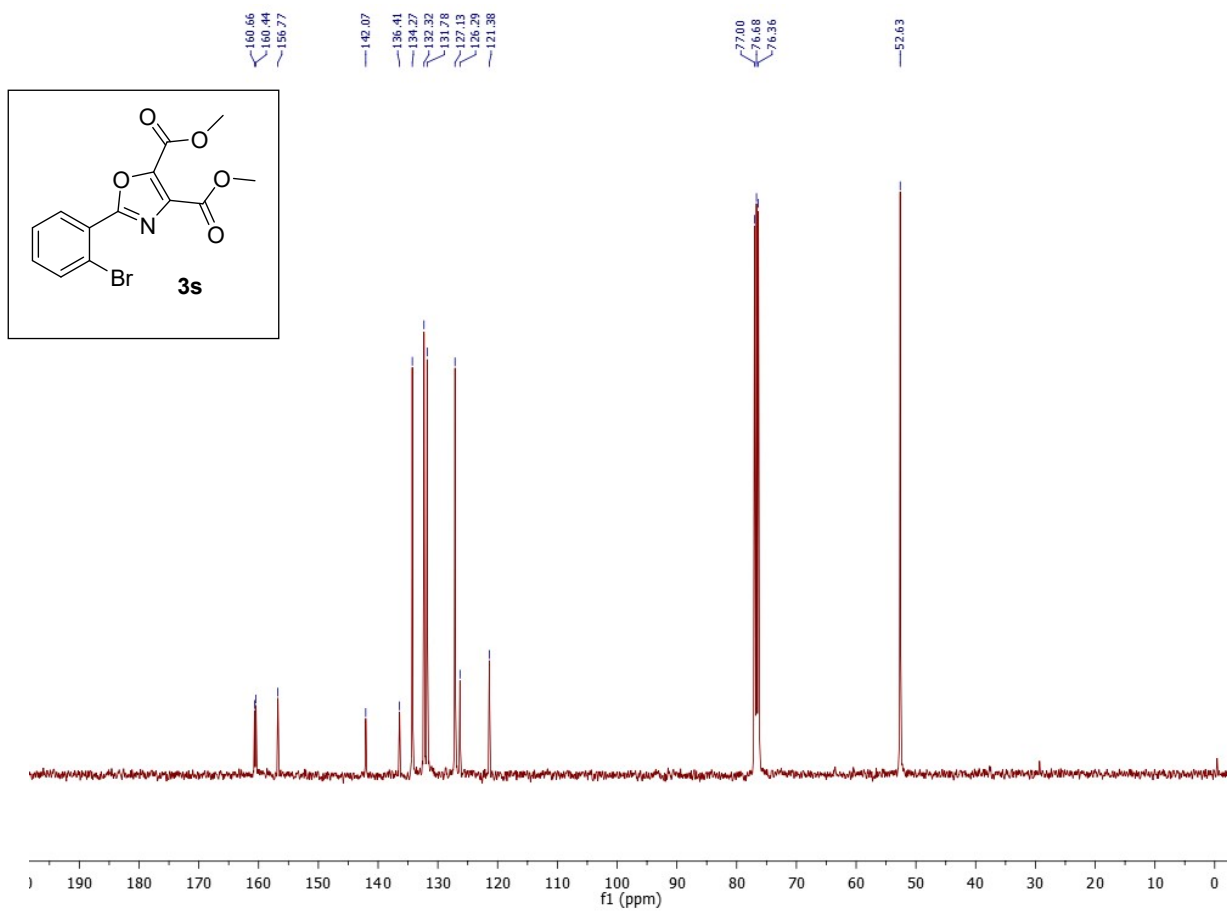

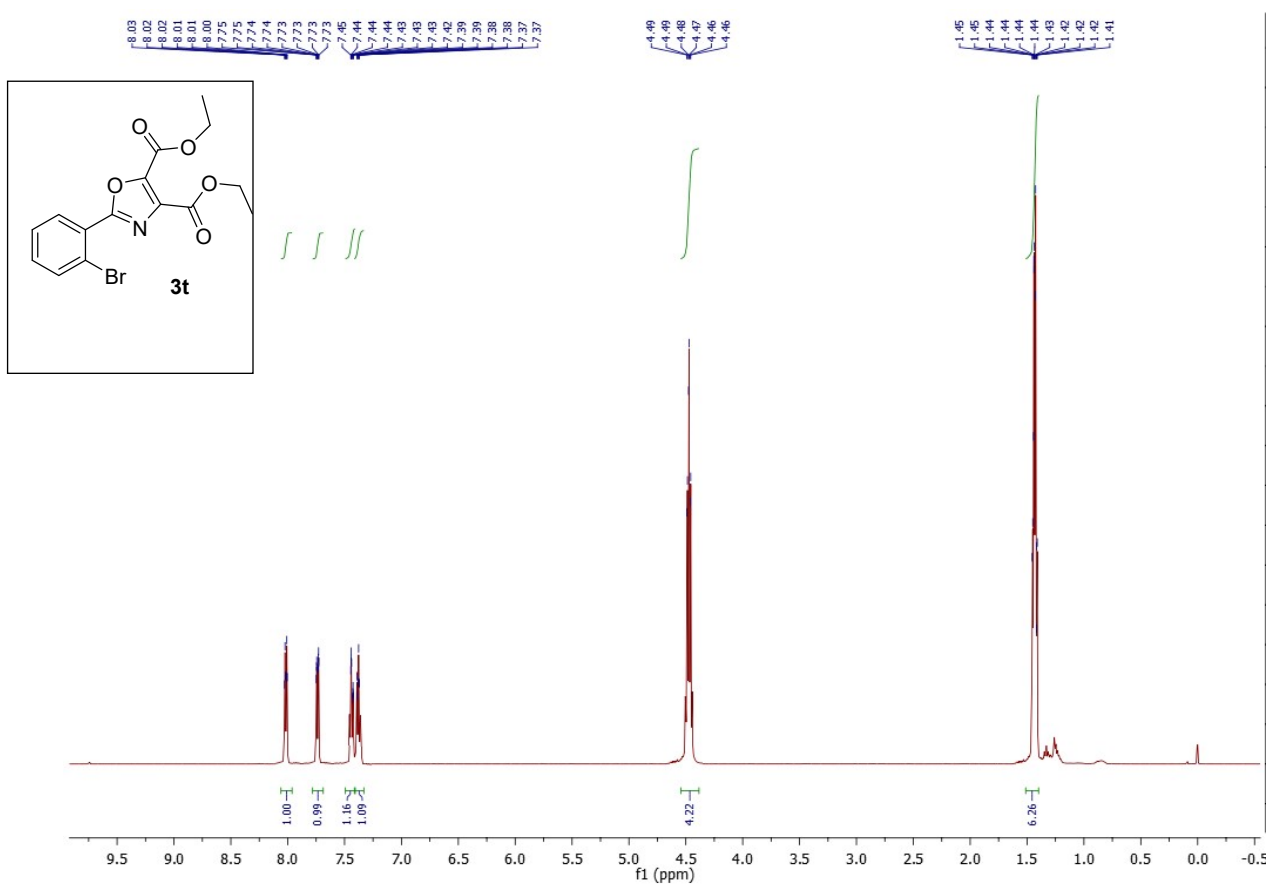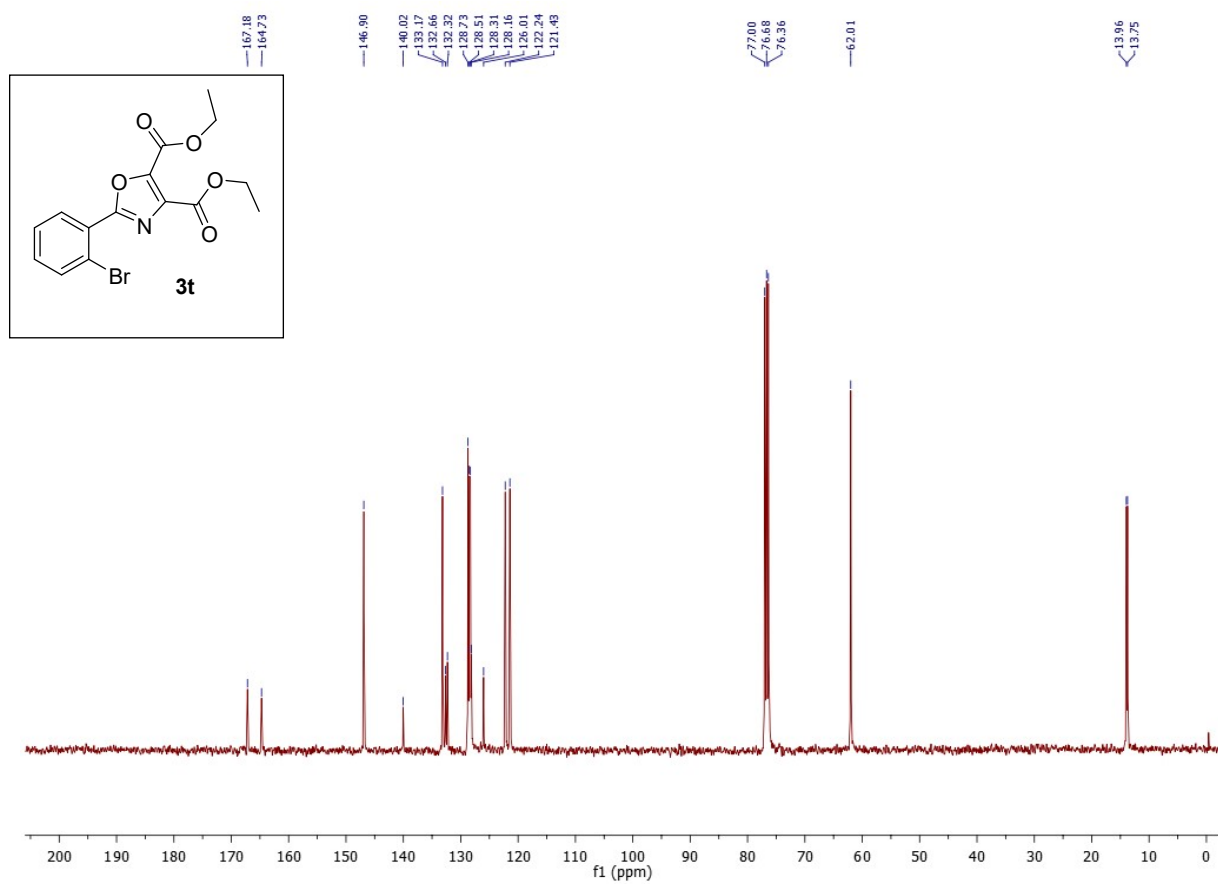

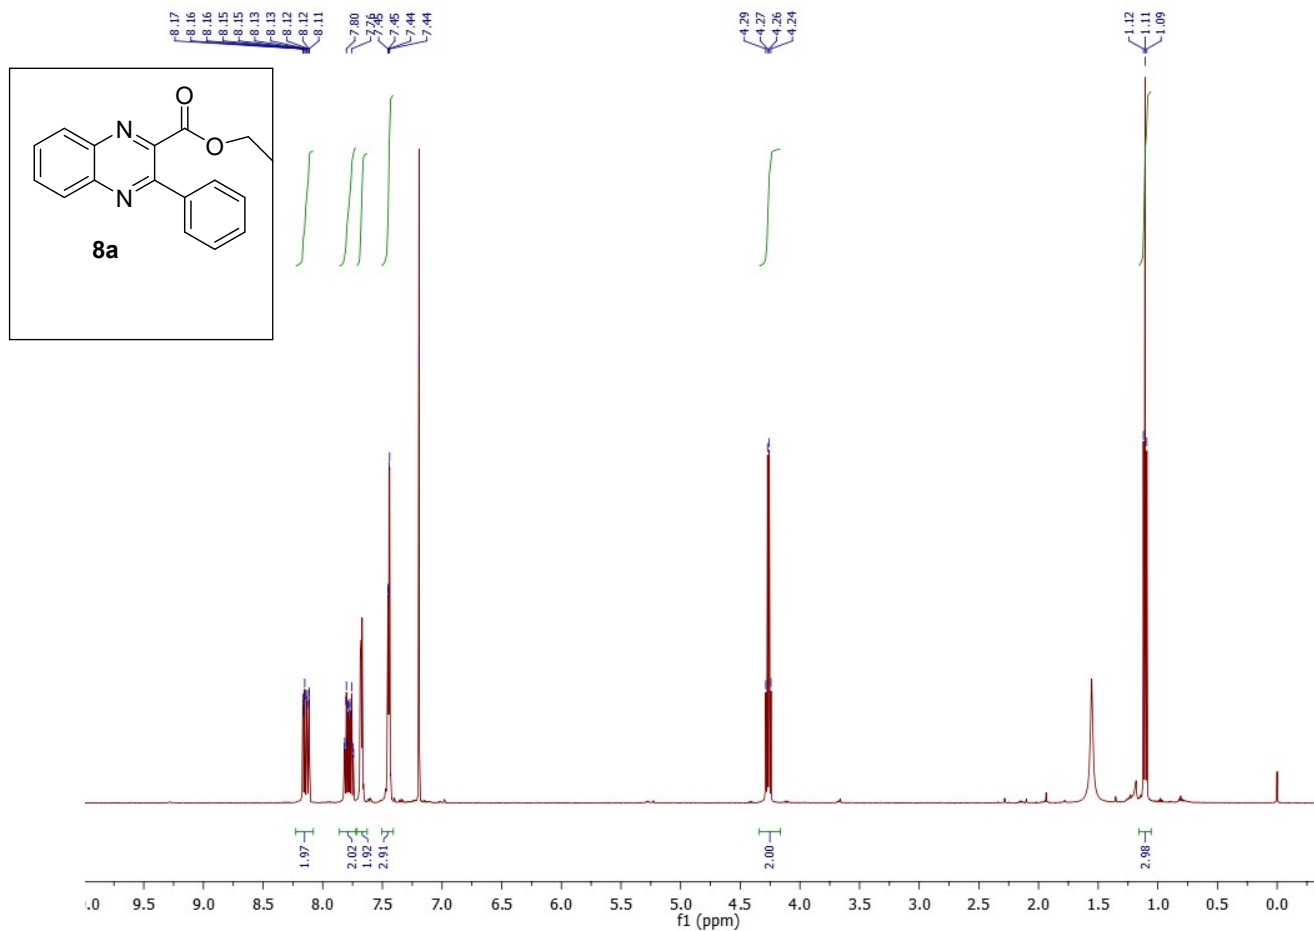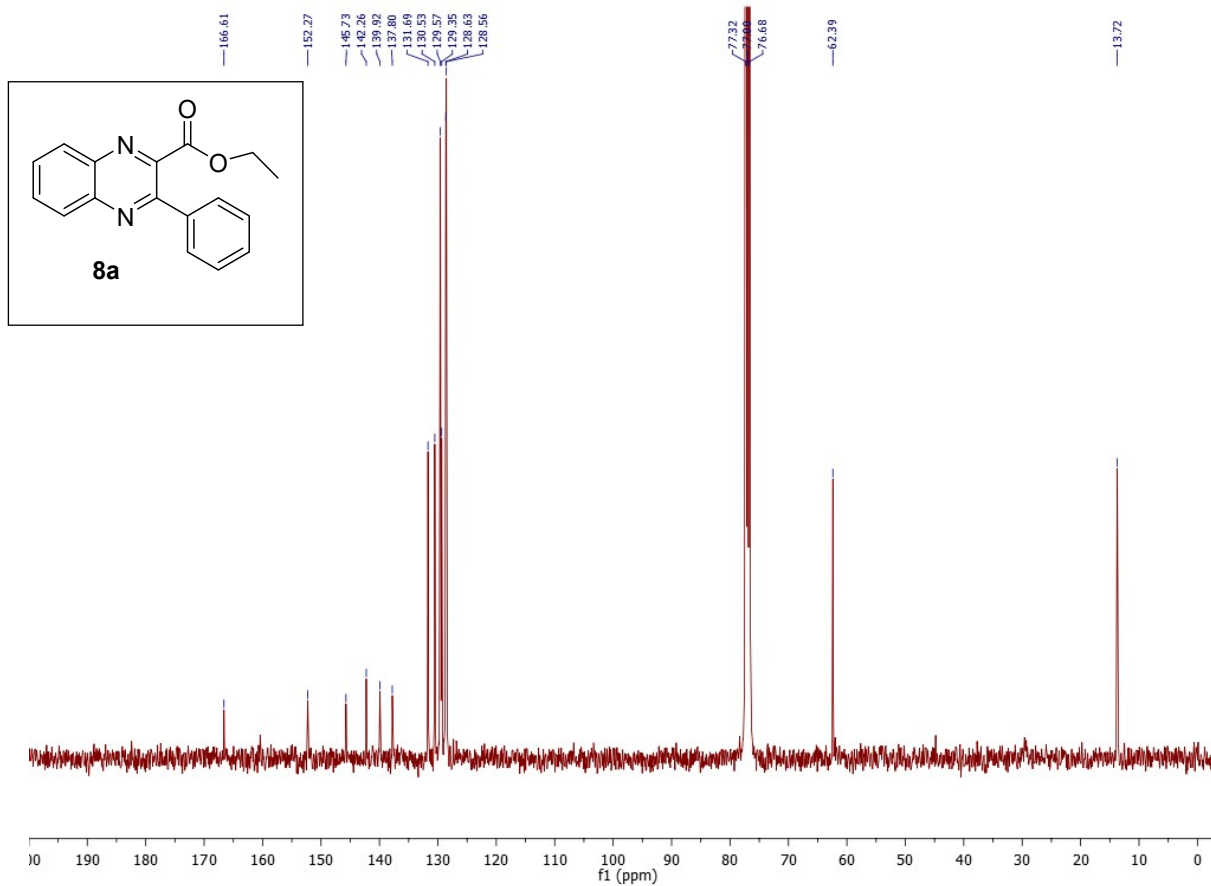



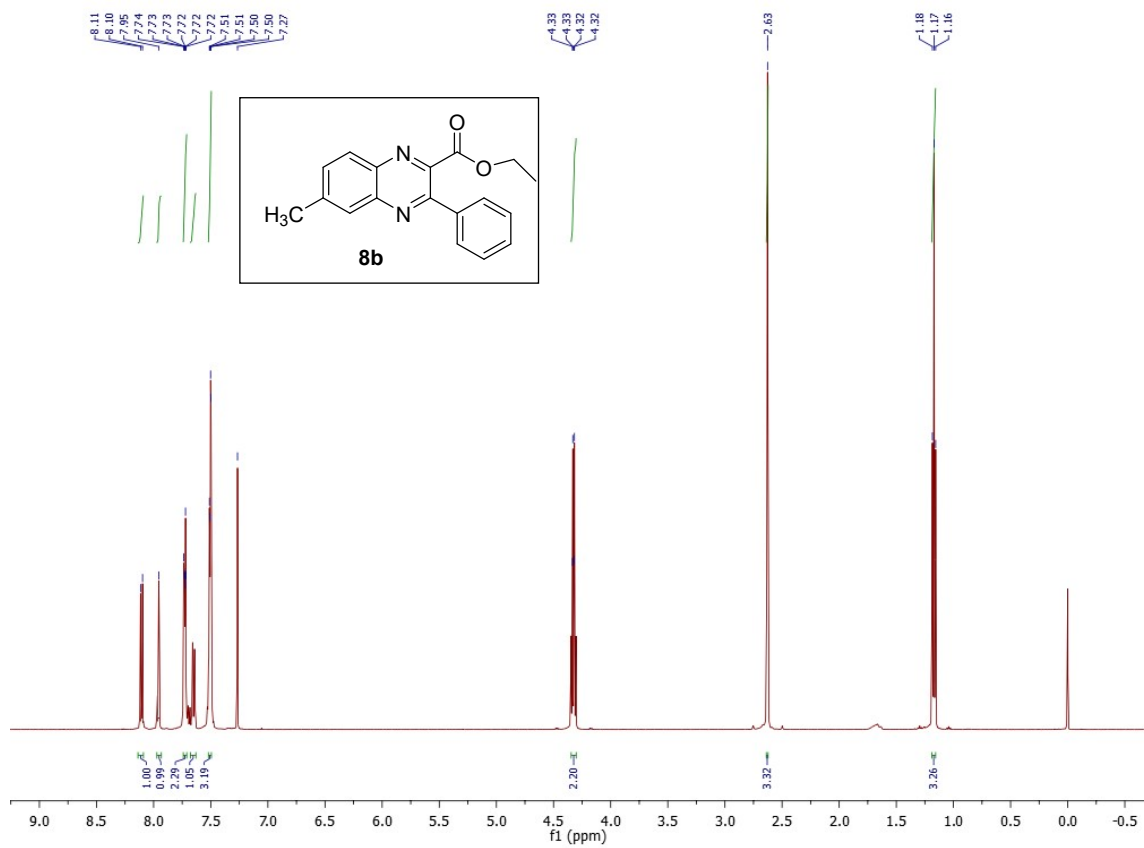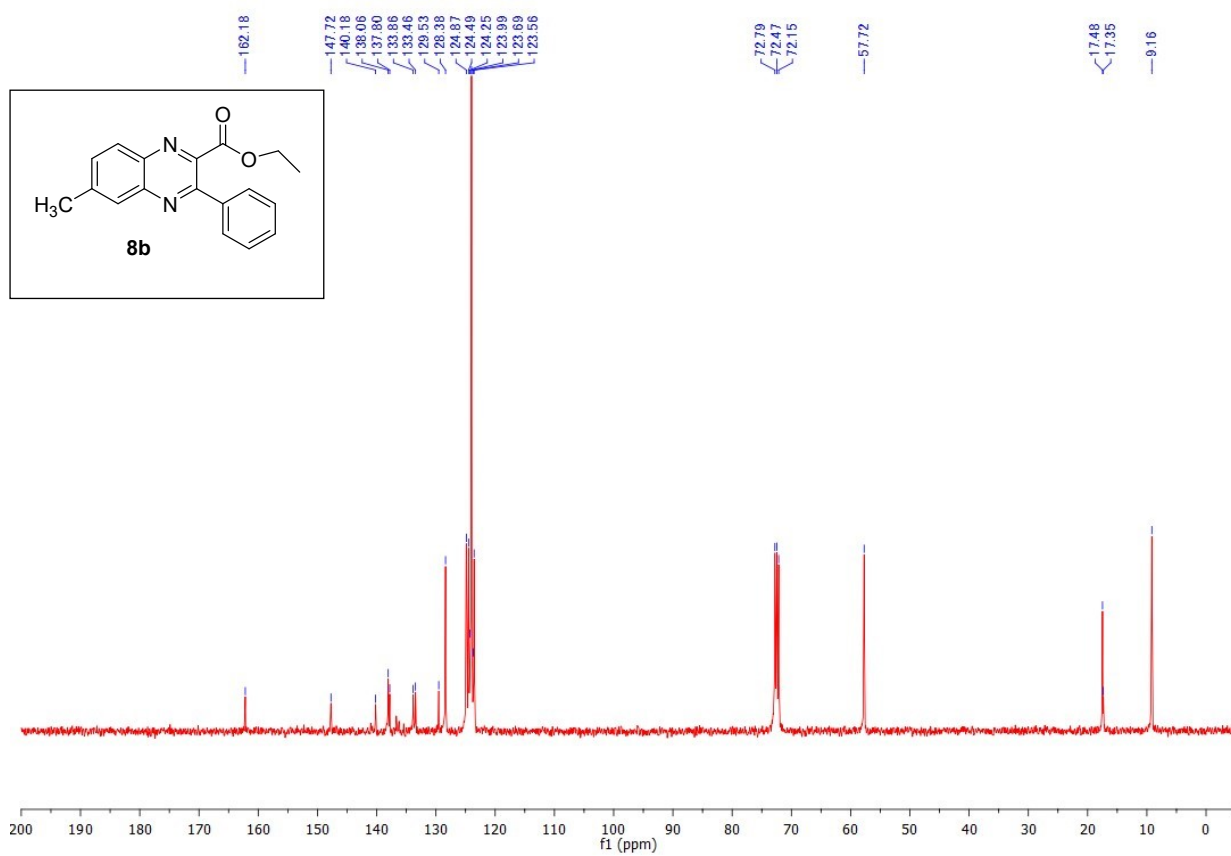

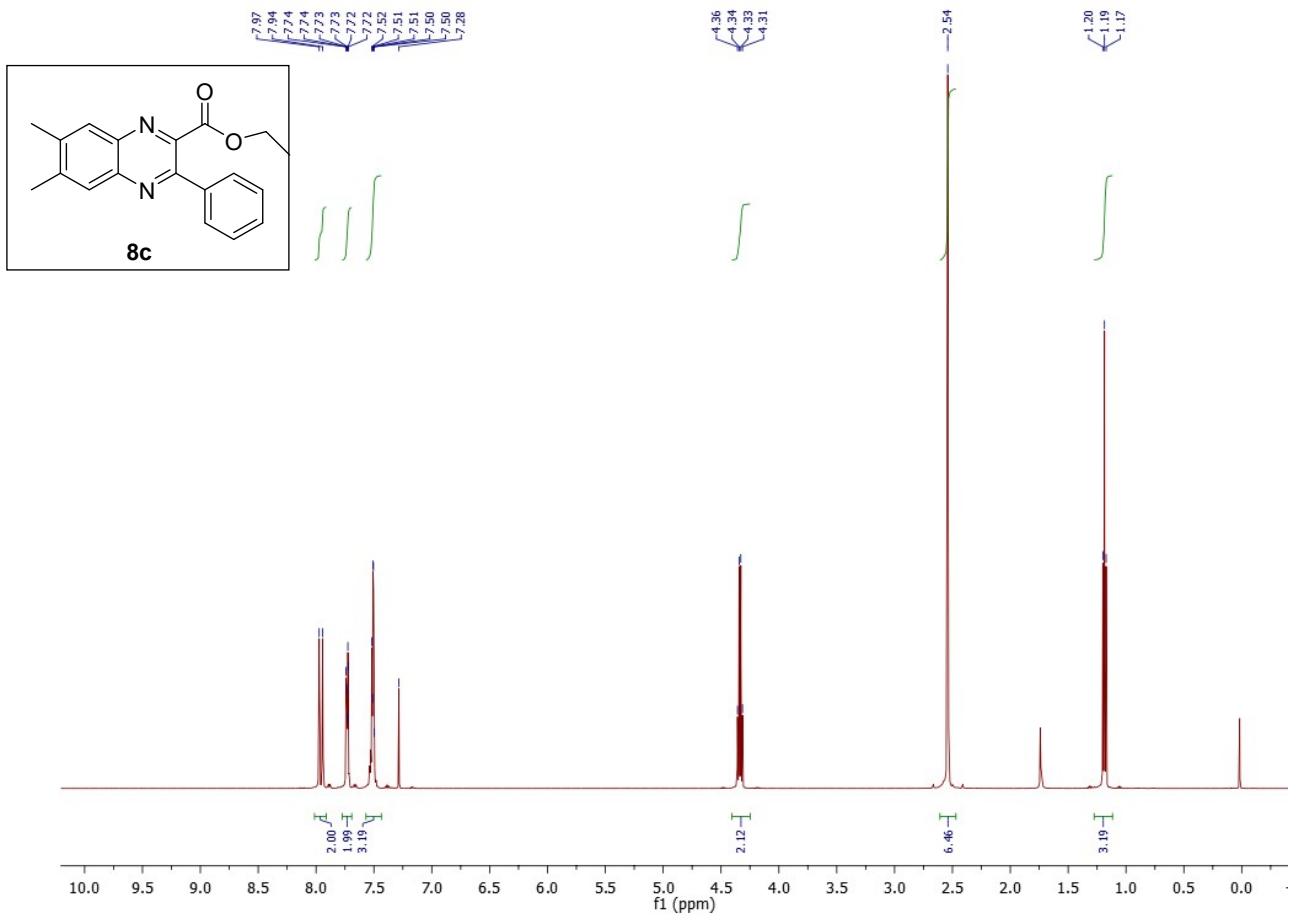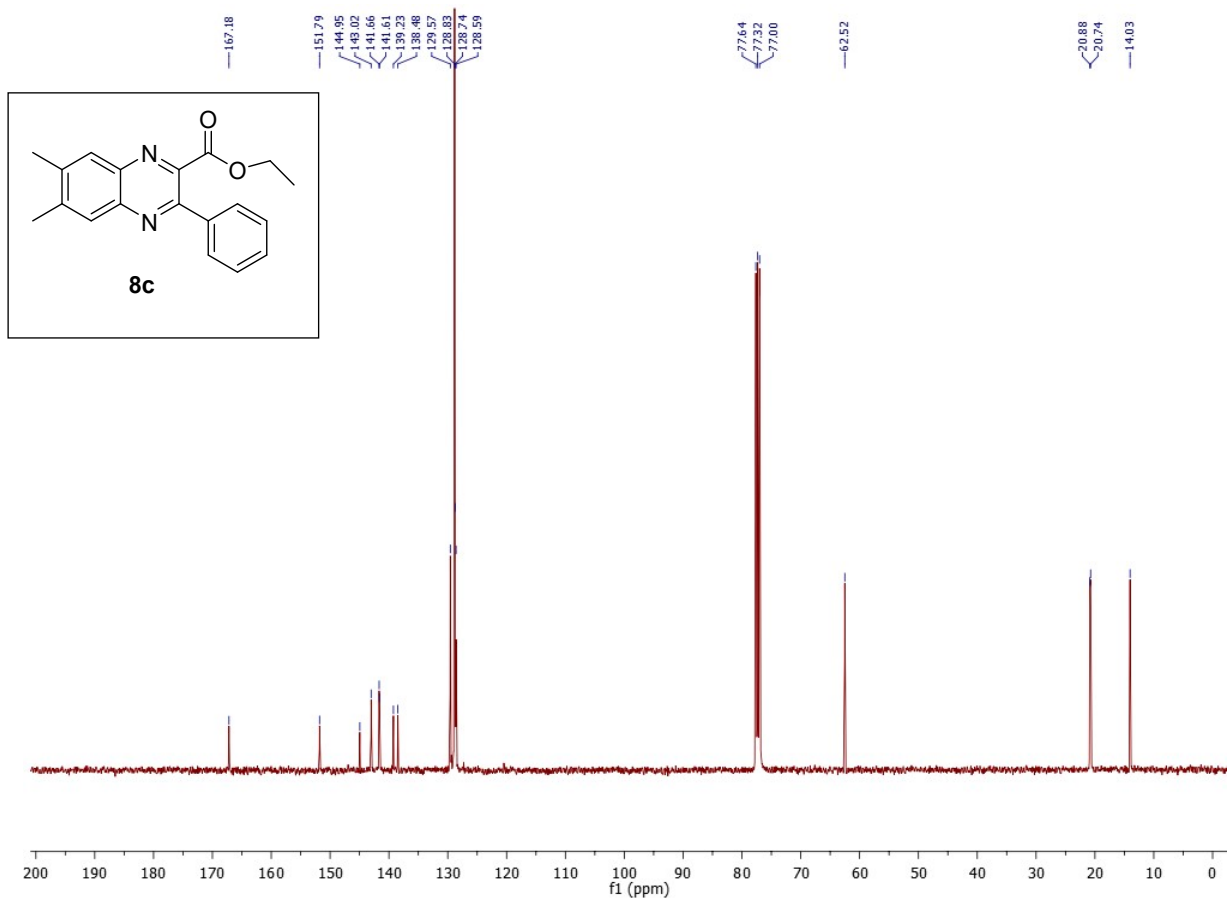

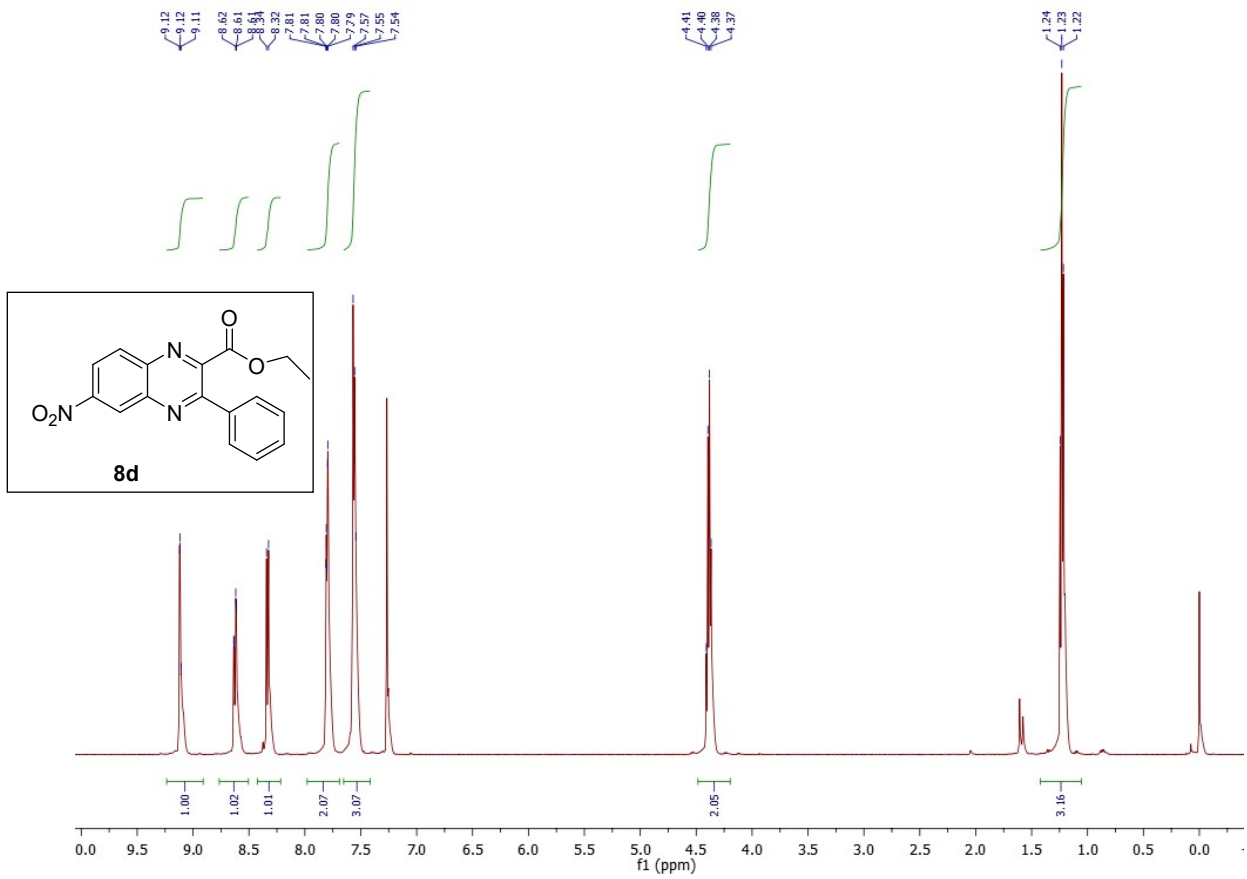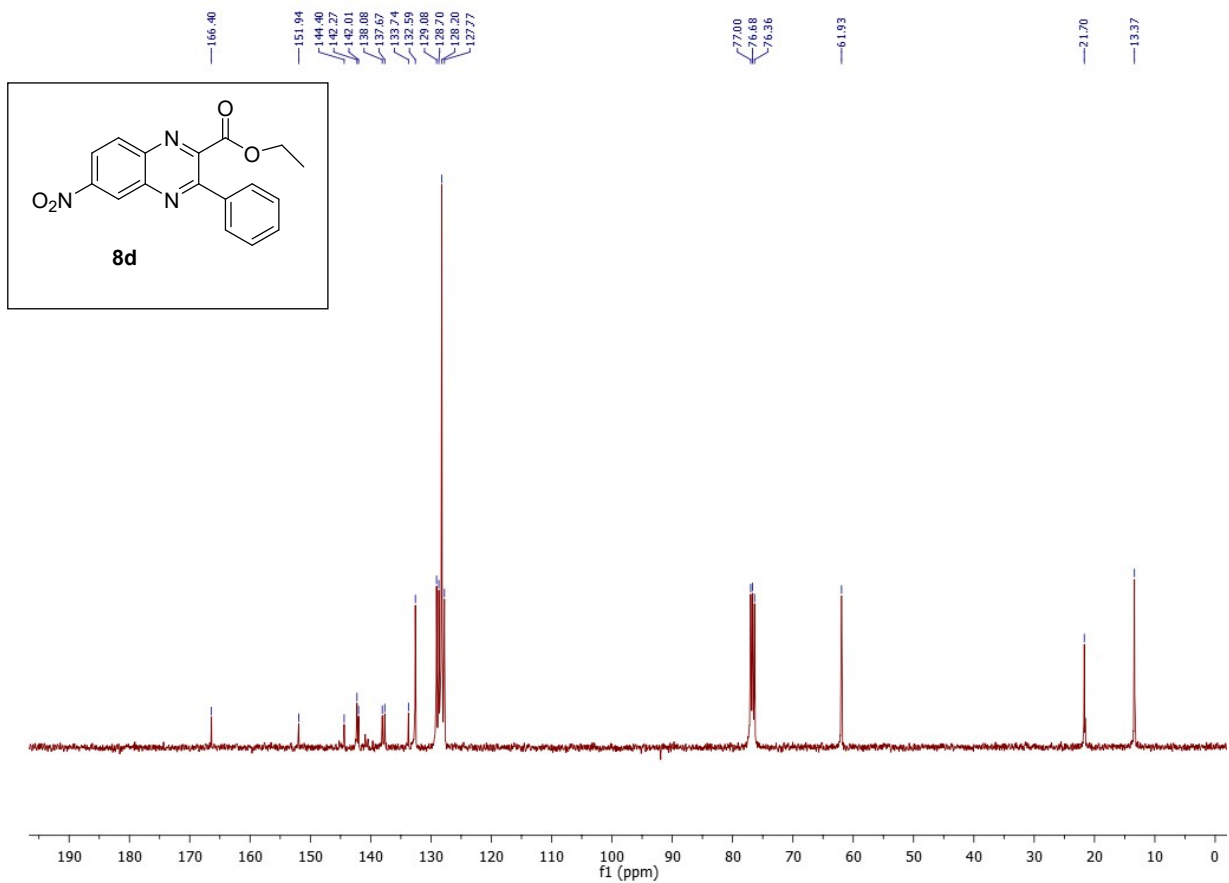

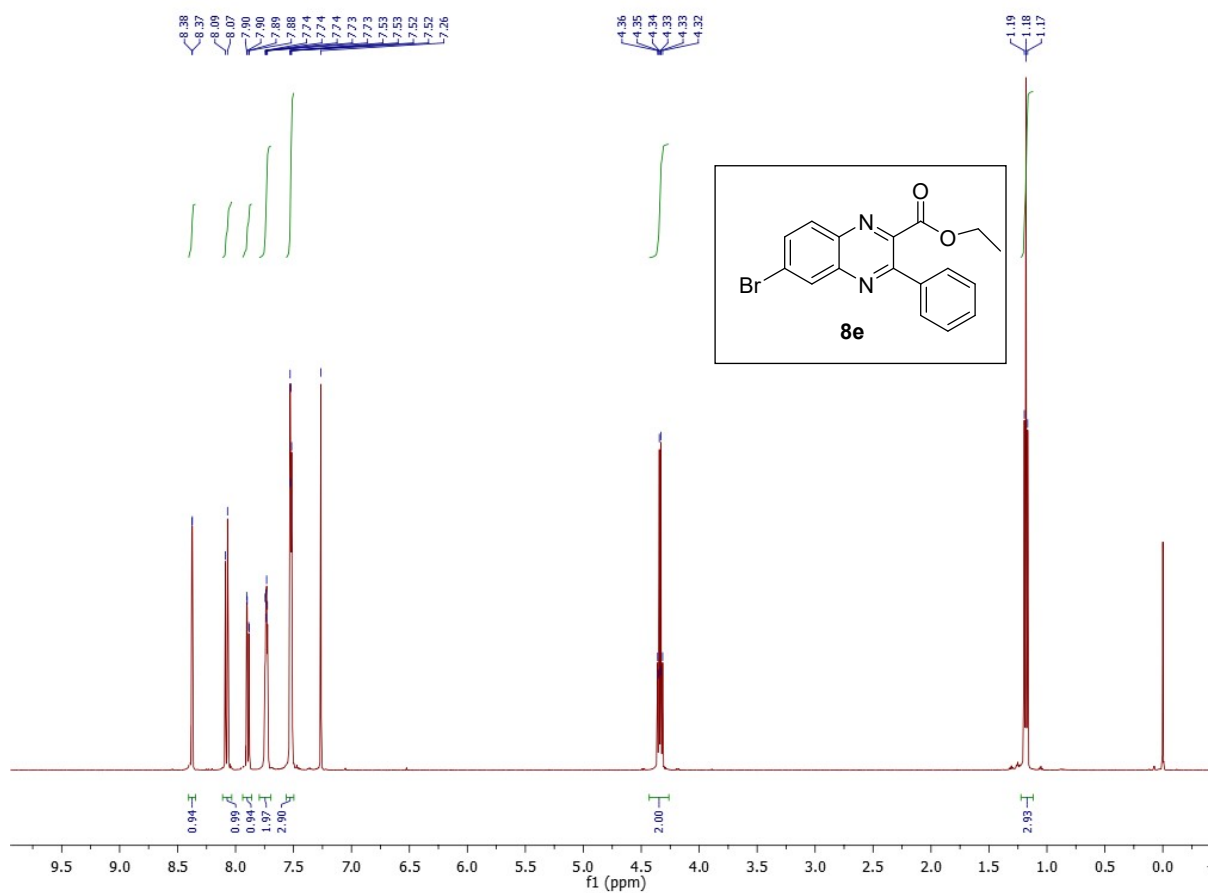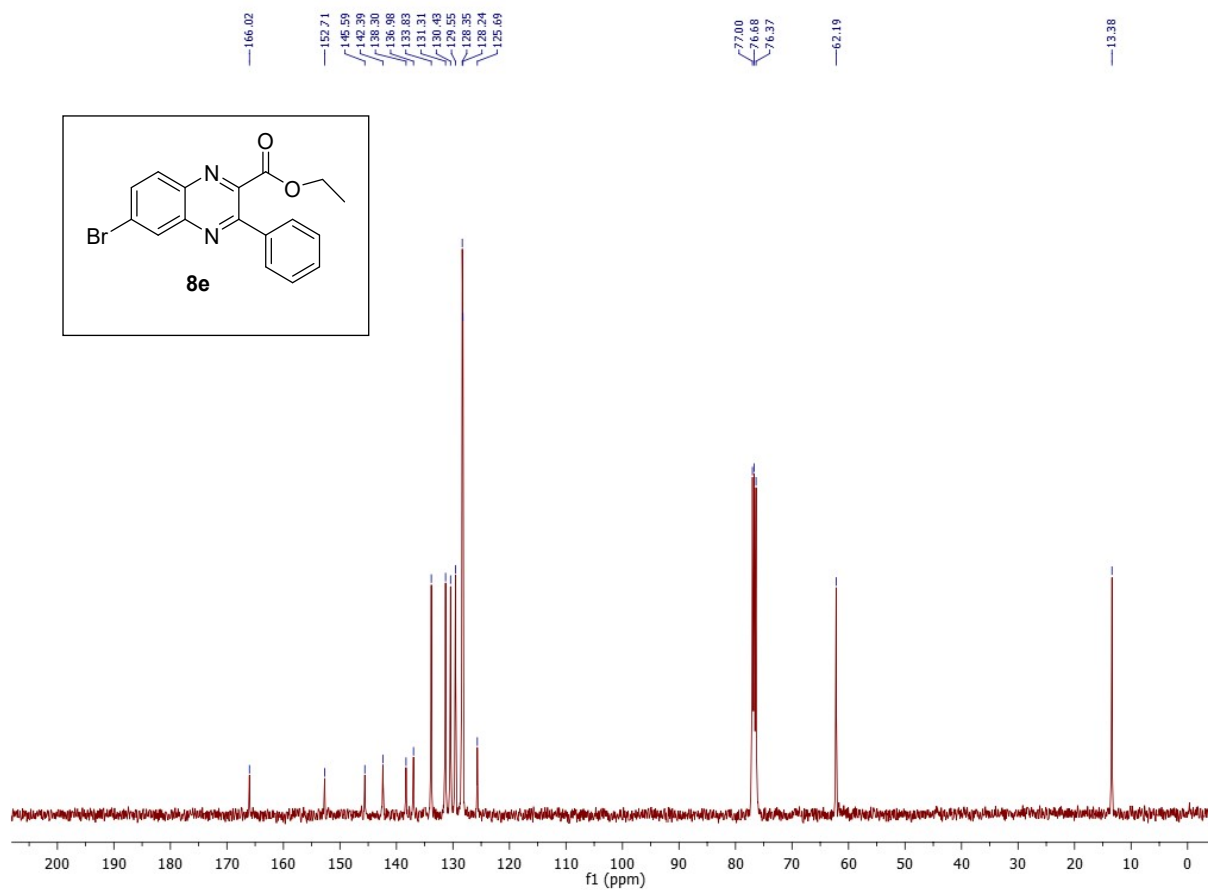

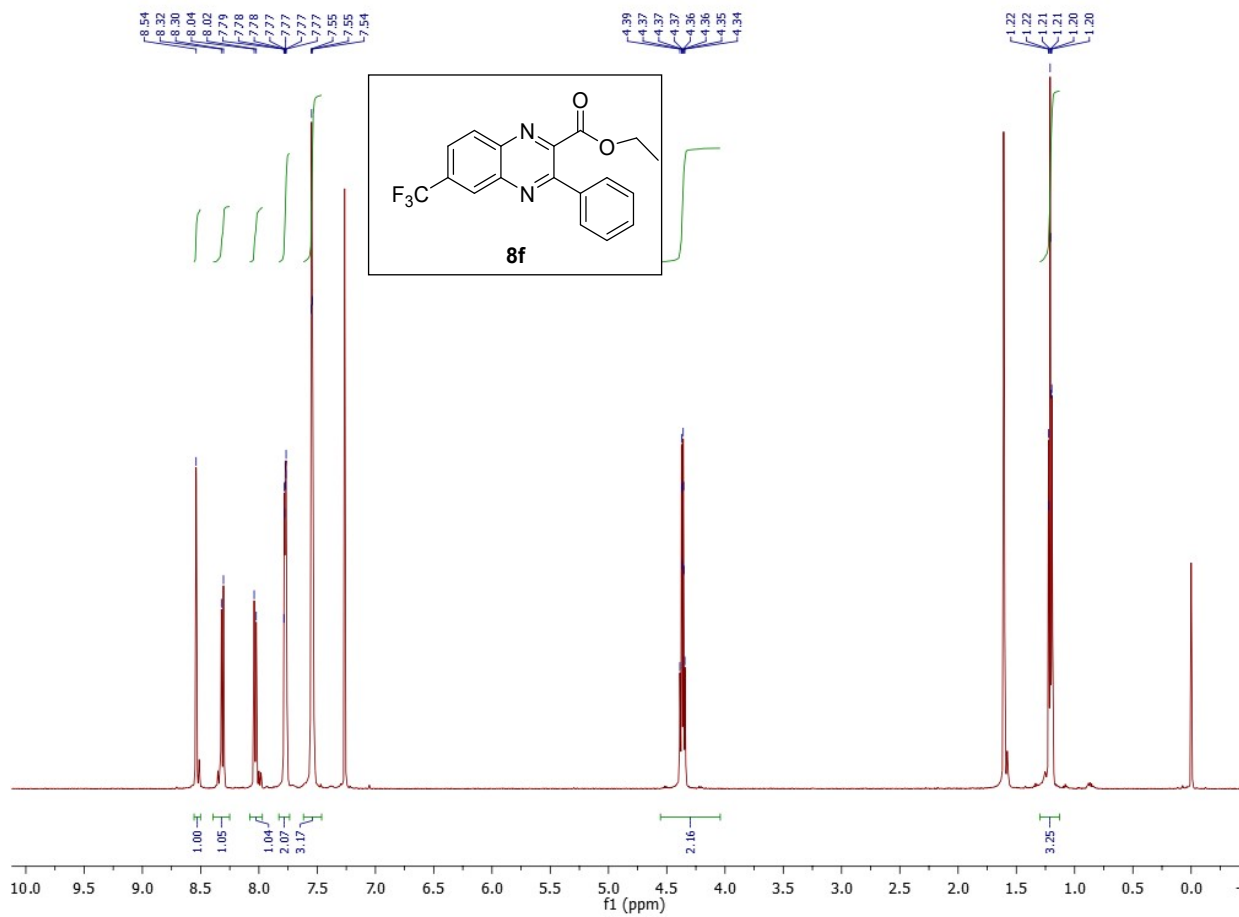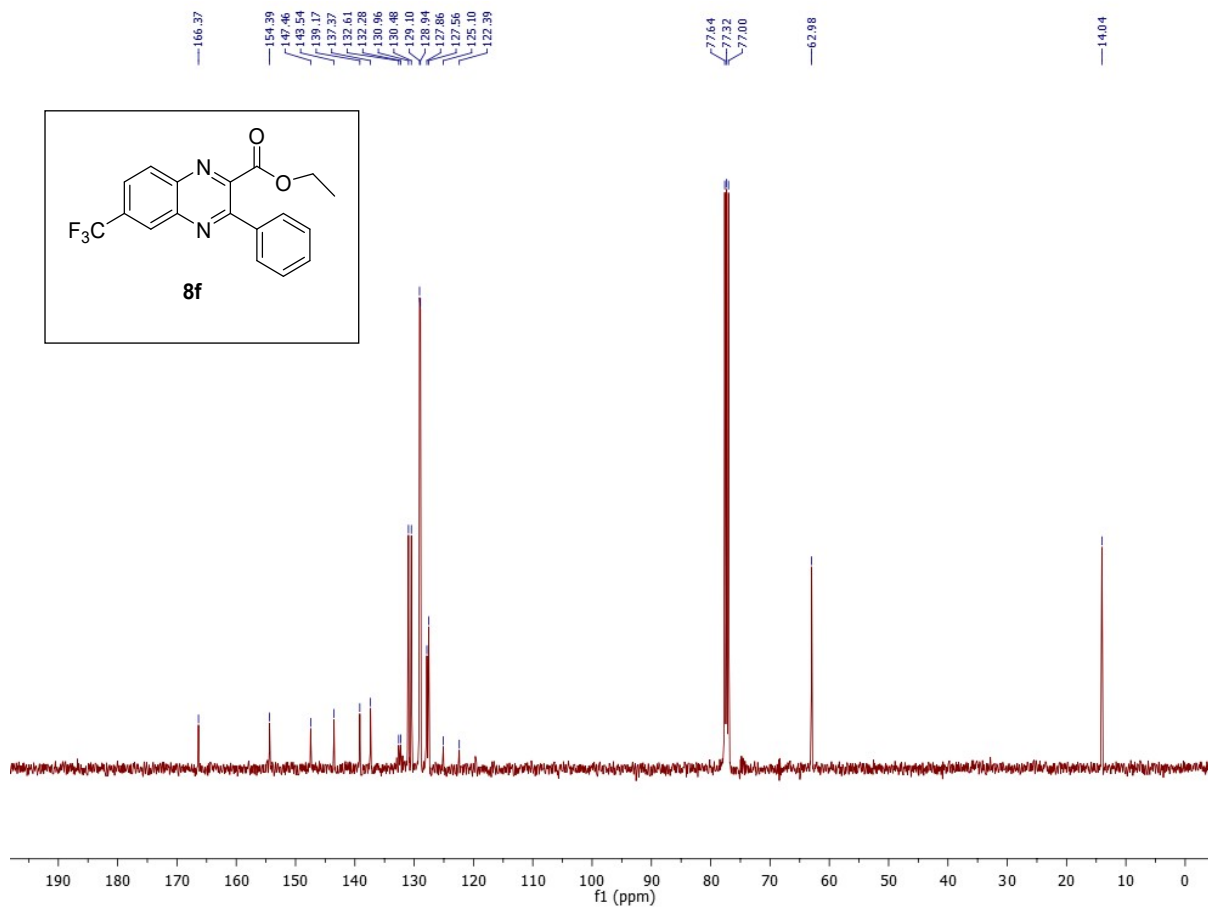

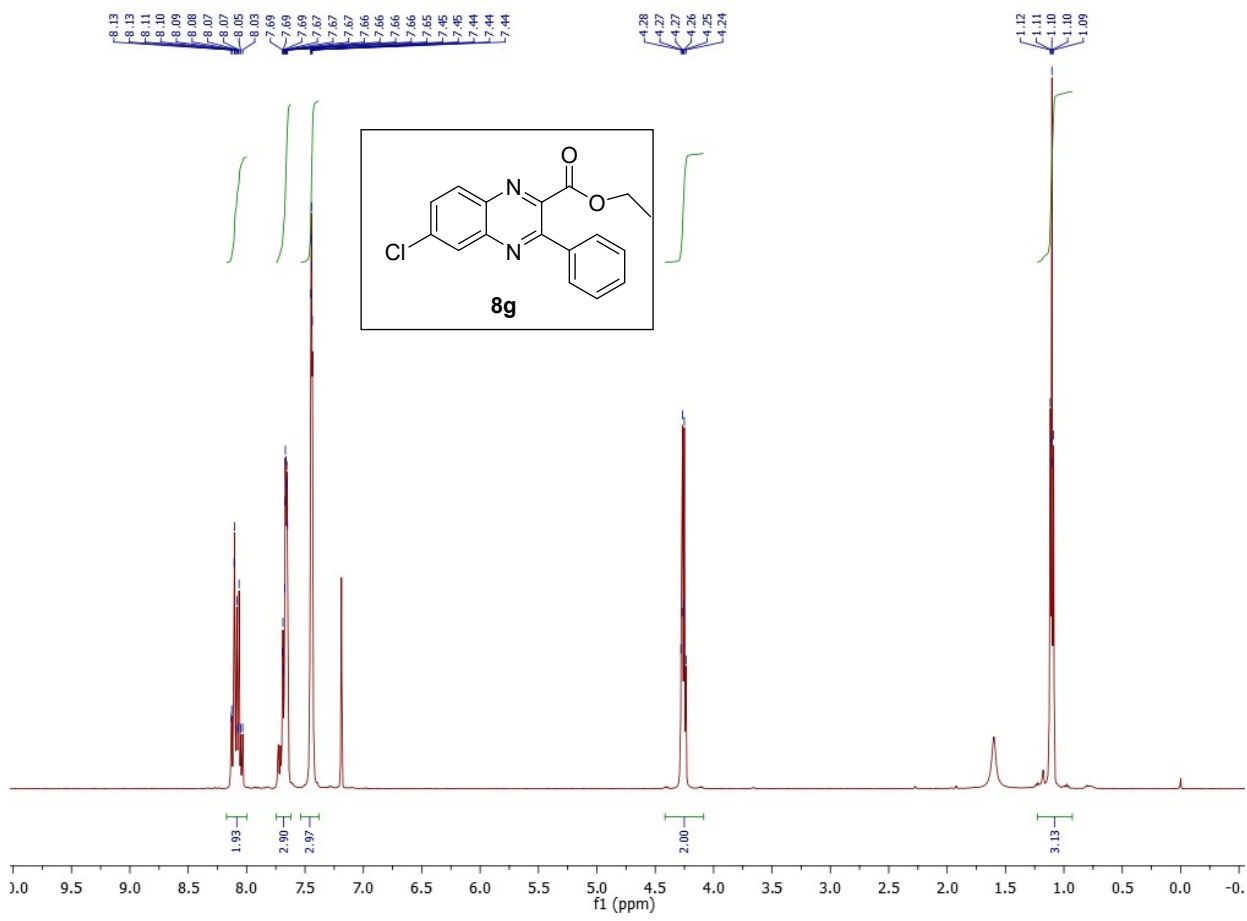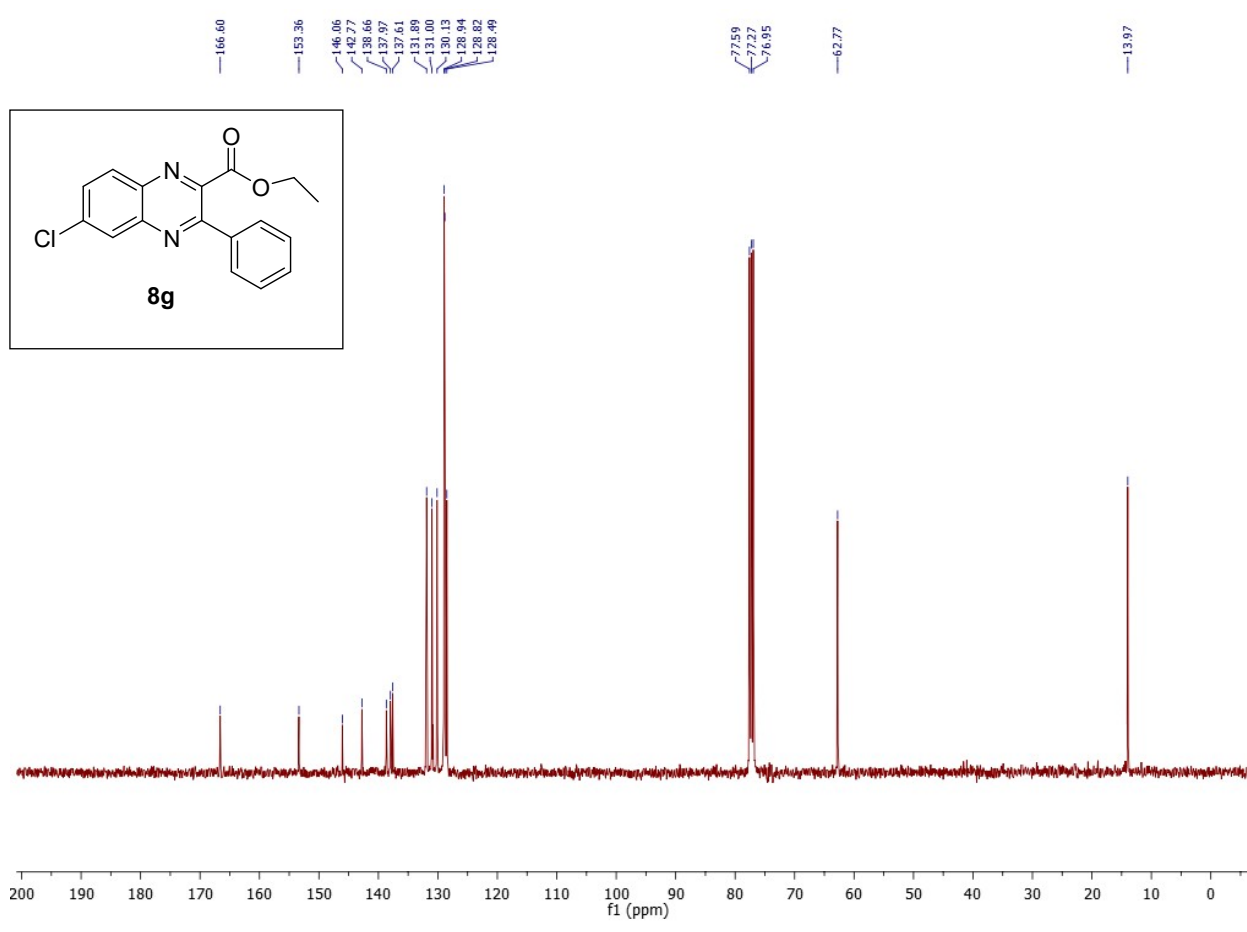

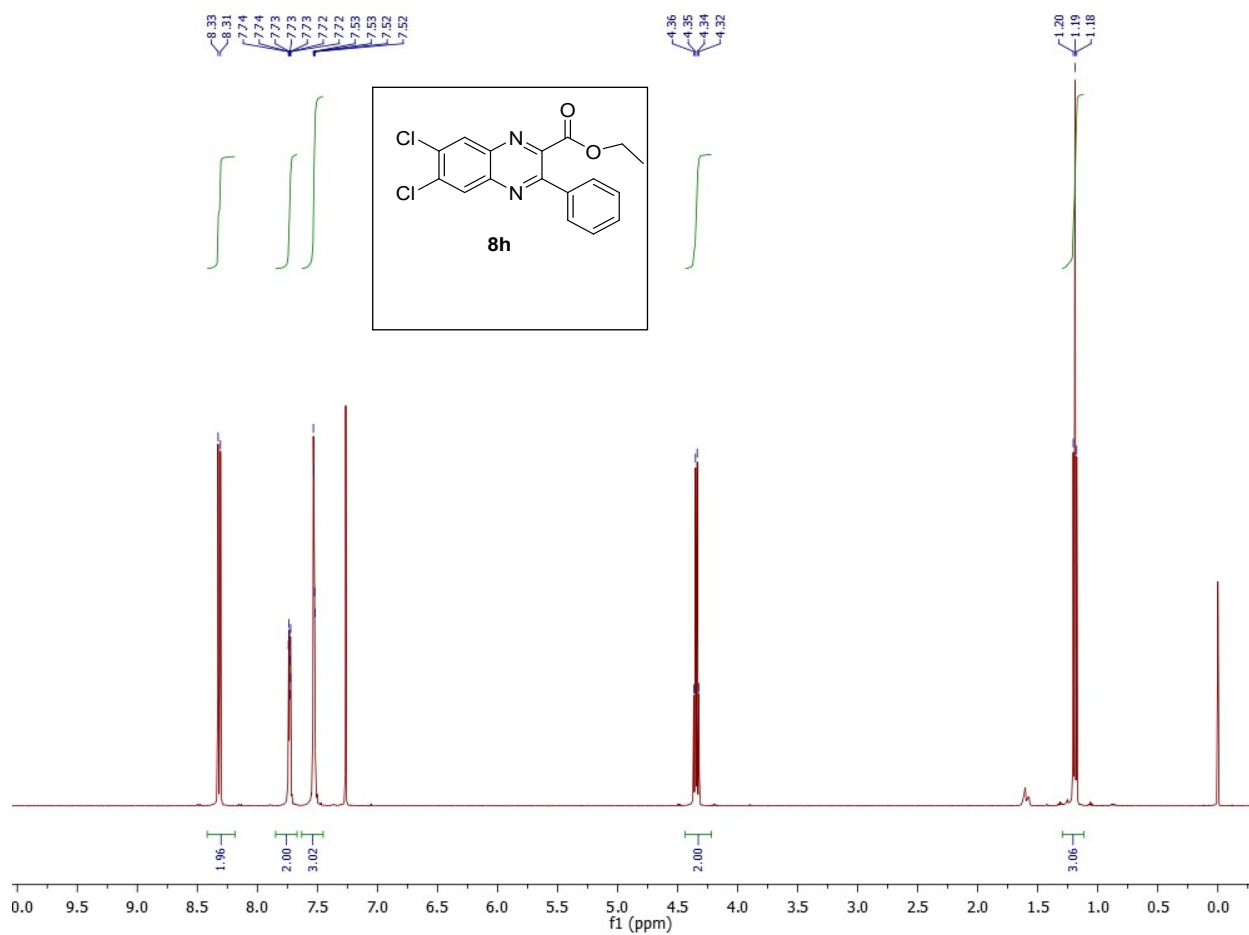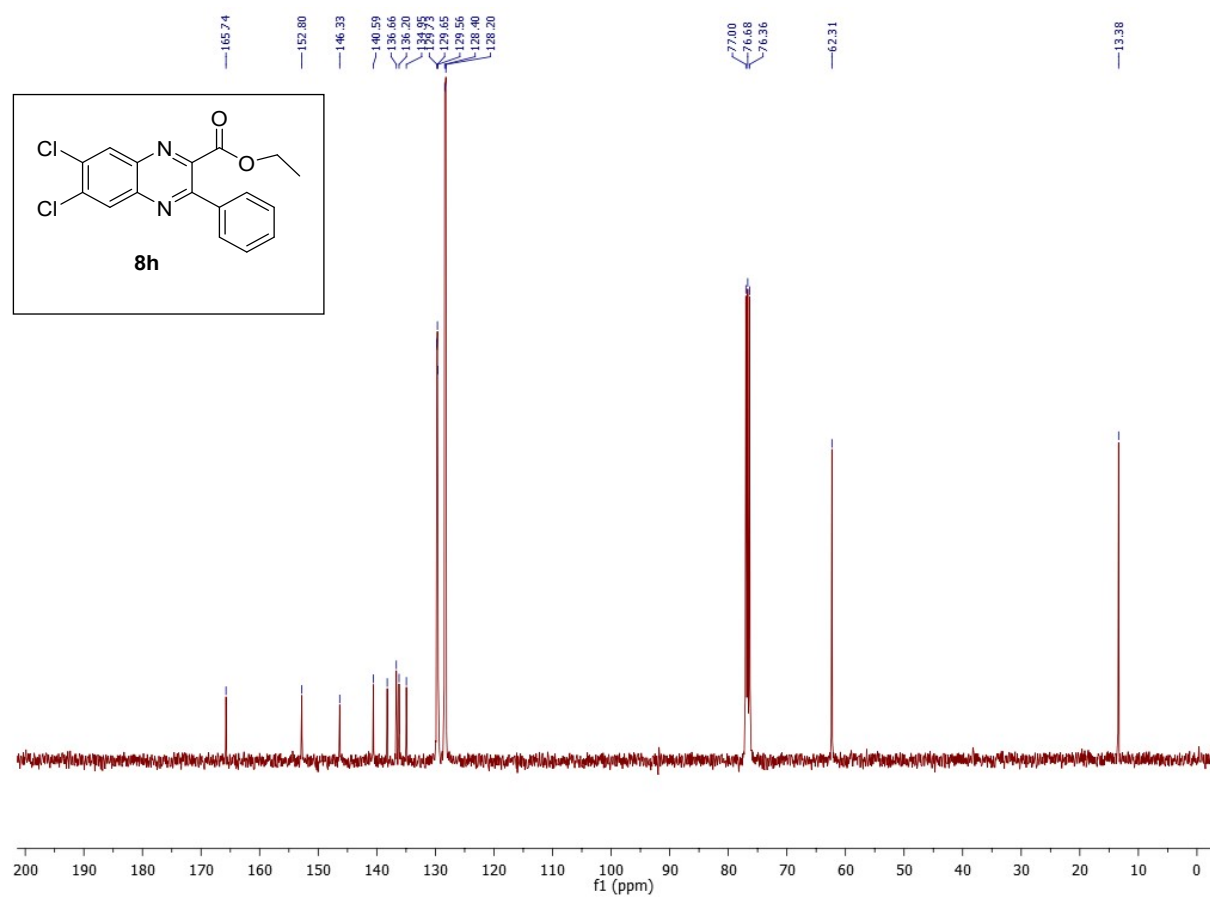

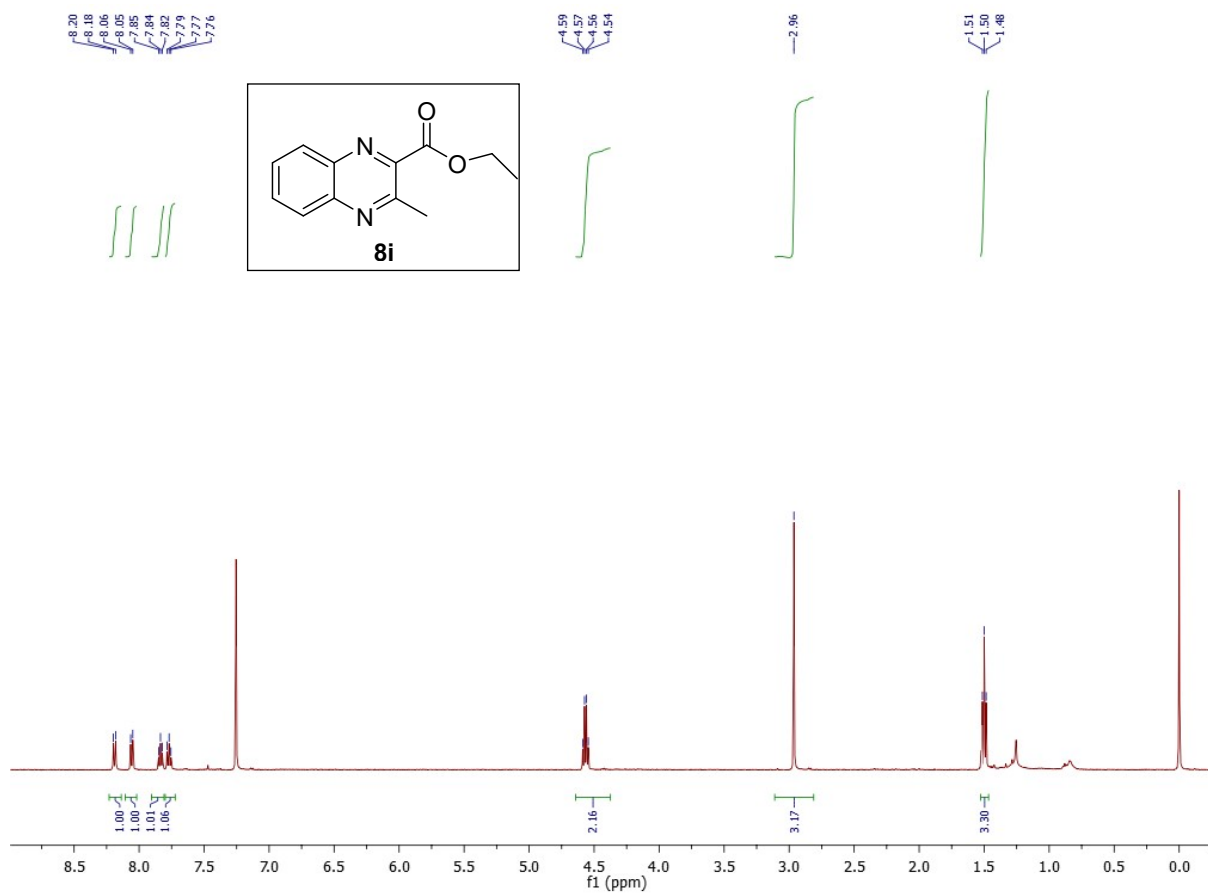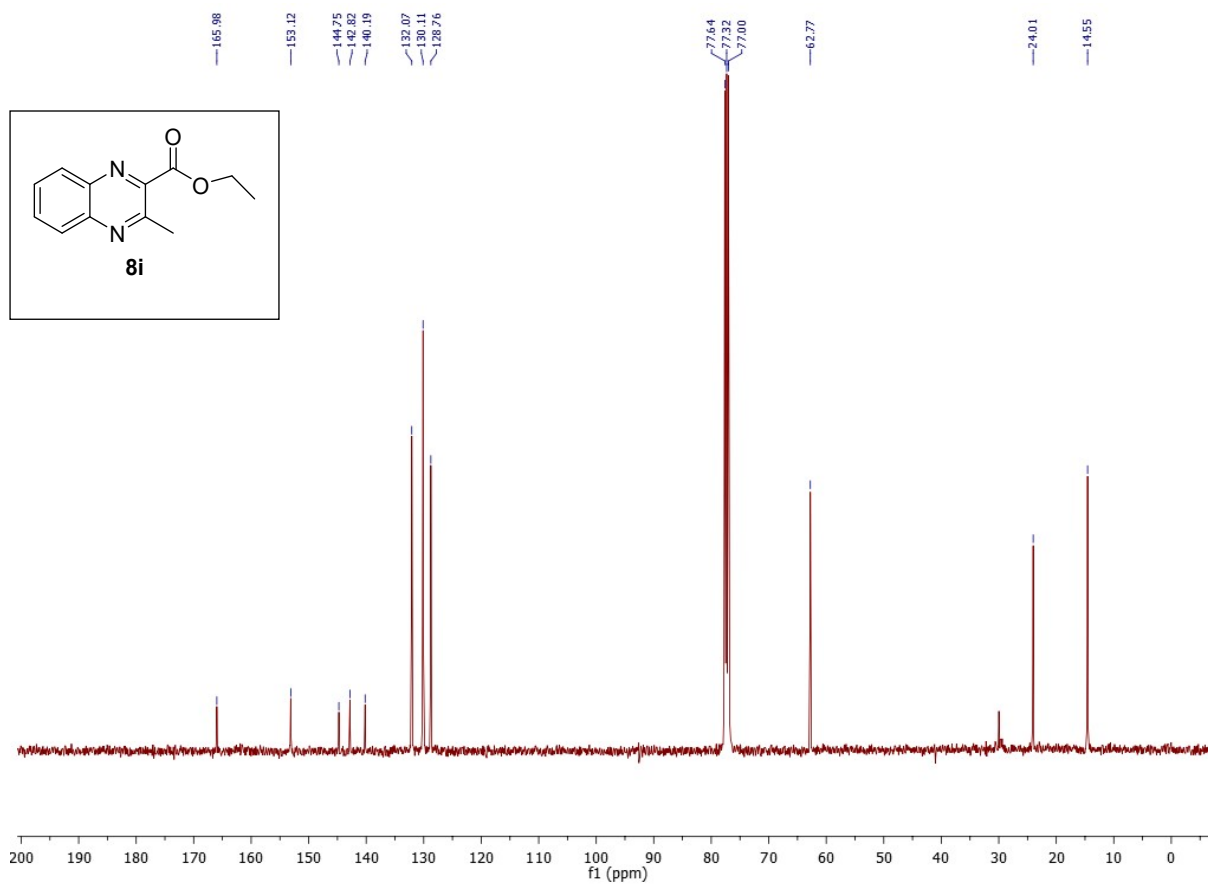



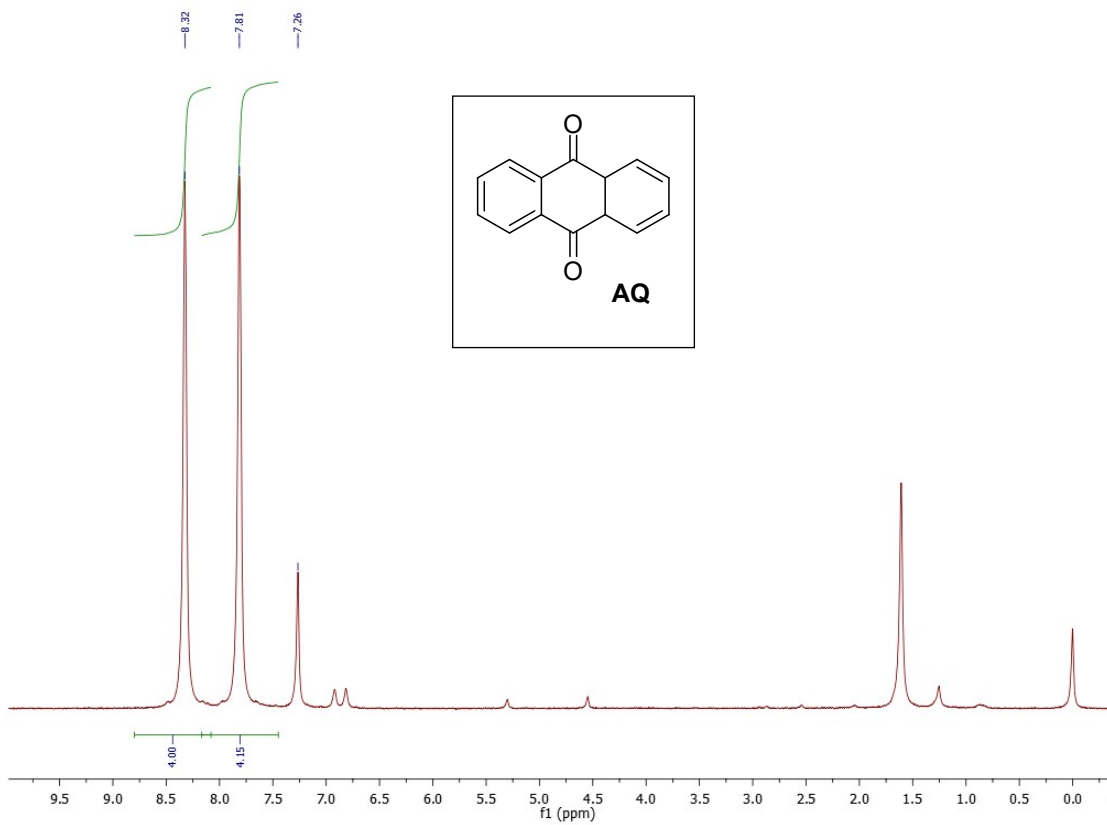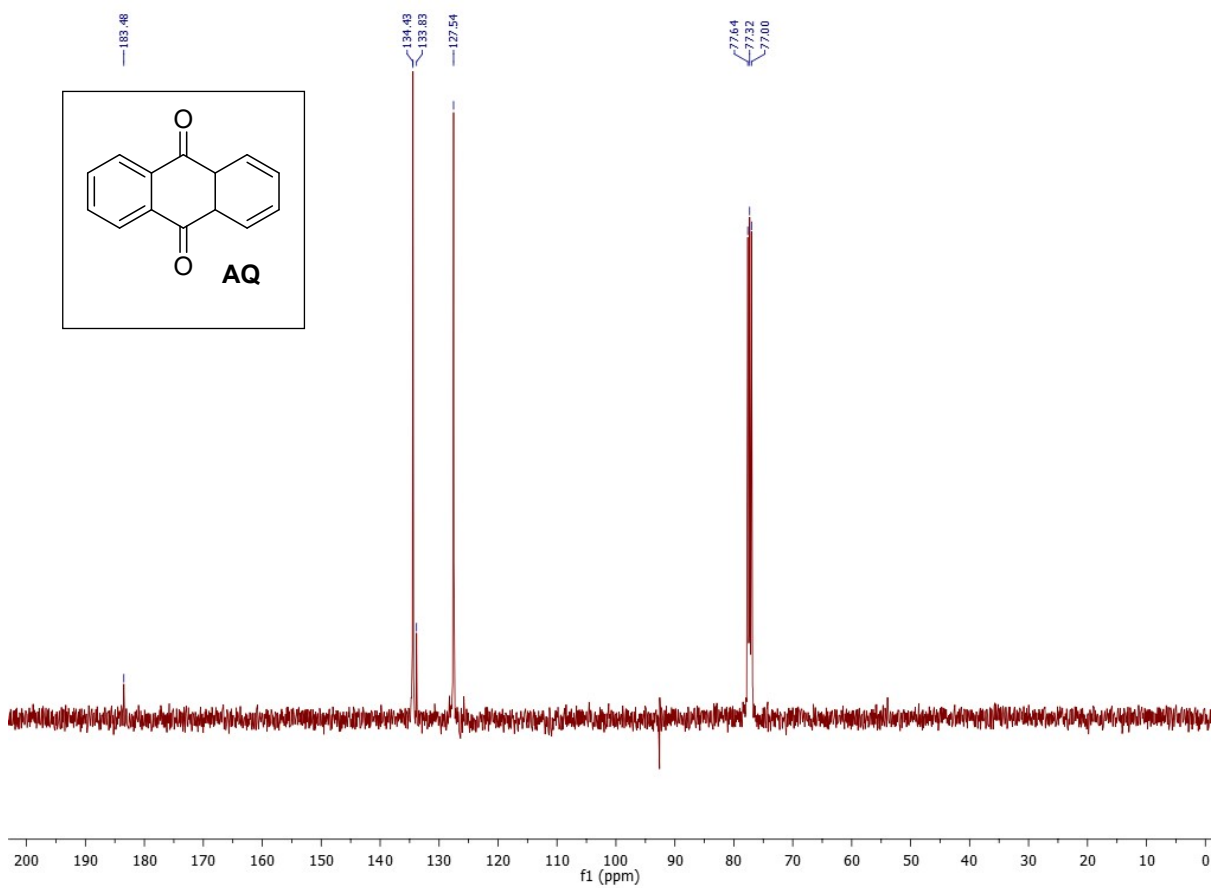

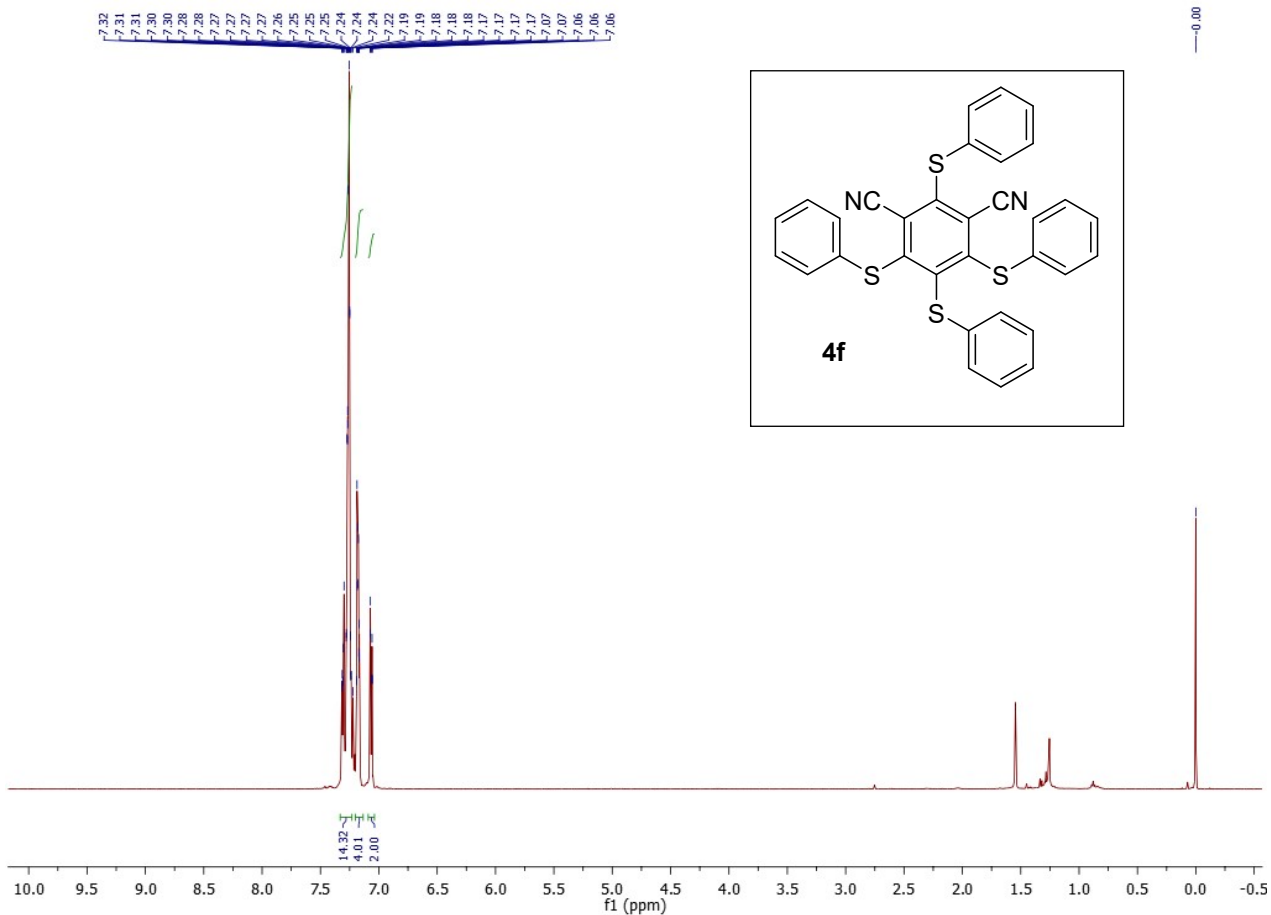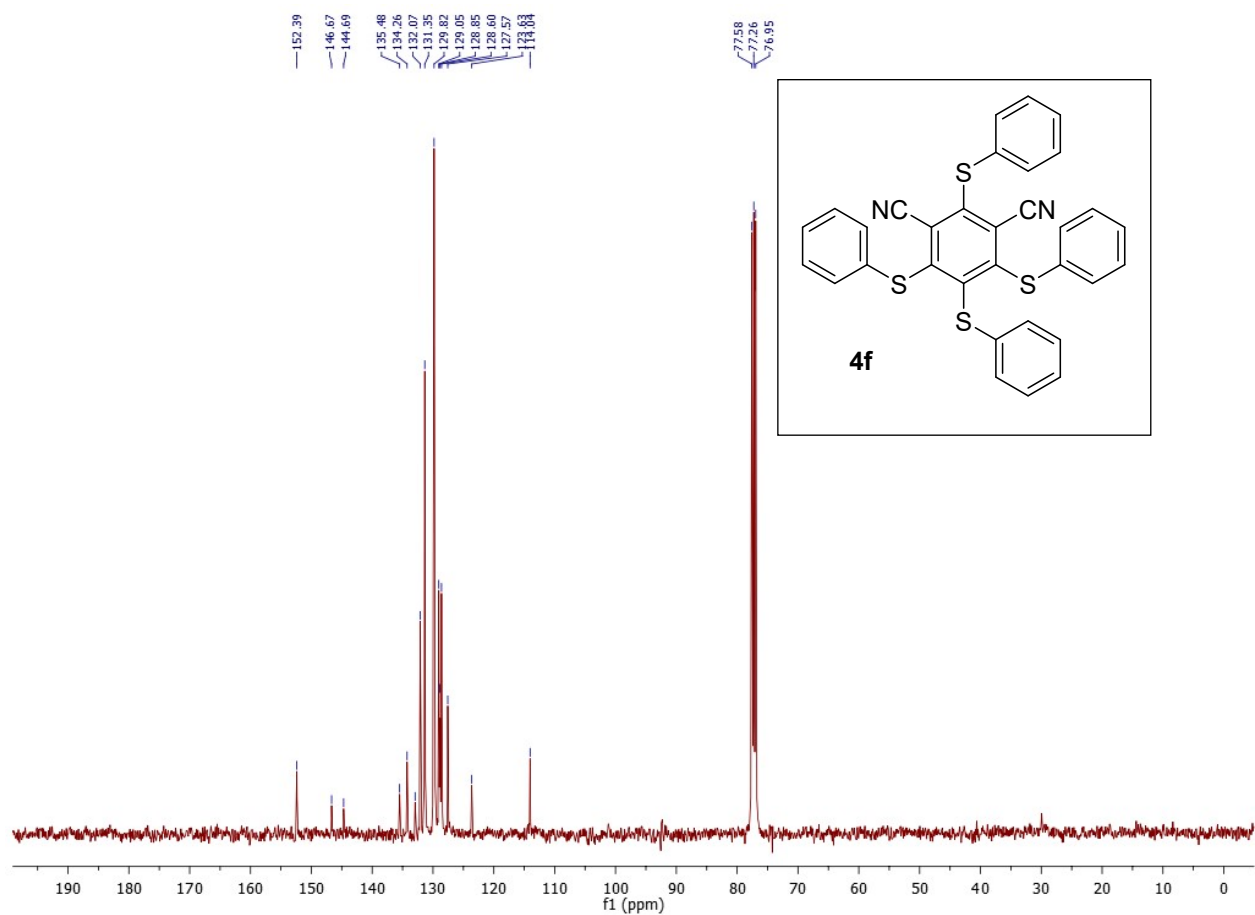

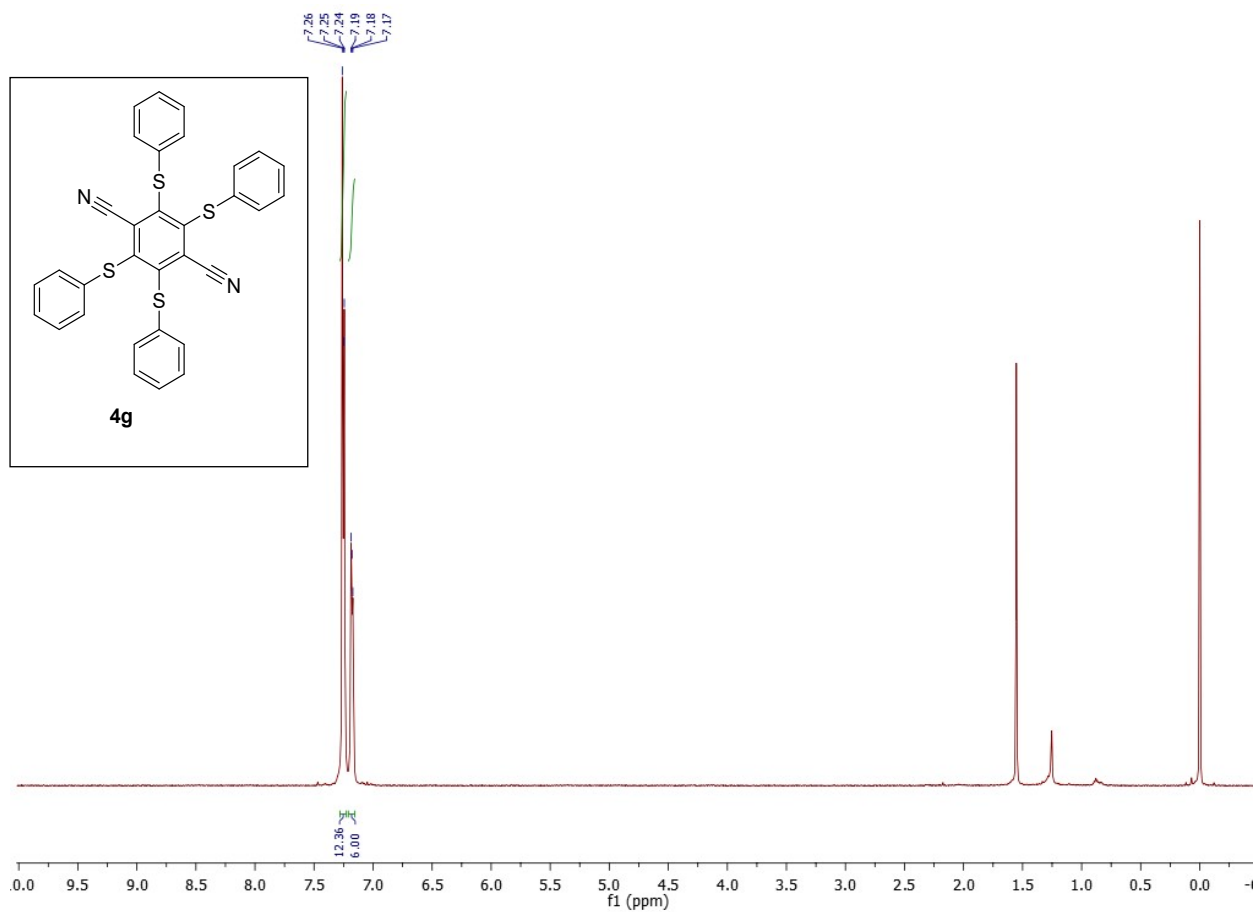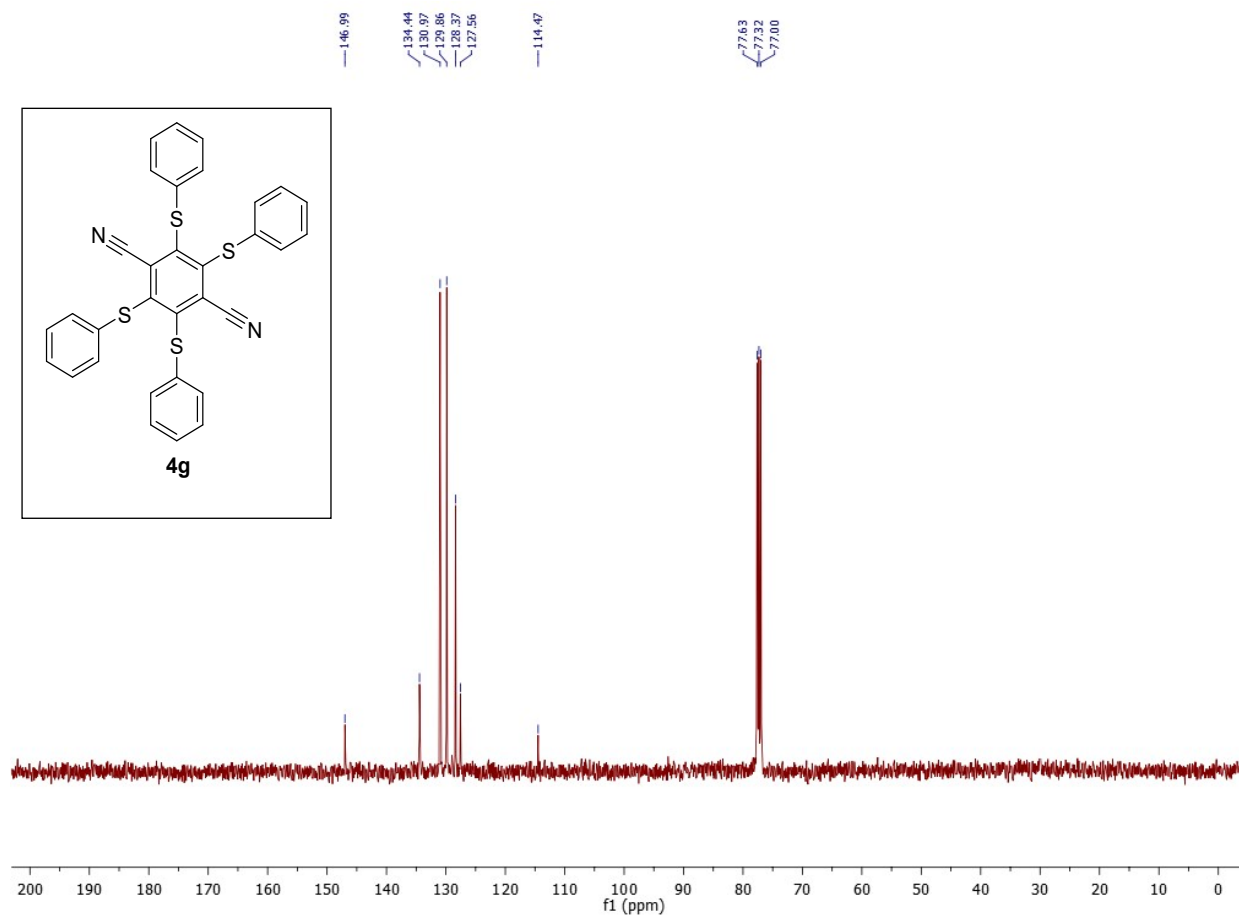

Supplement: d4ob00609g1.pdf [file d4ob00609g1.pdf]
